# Supplementary material for: Development and validation of a prediction rule for patients suspected of acute coronary syndrome in primary care: a cross-sectional study
Source: PubMed Central journal article supplement — BMJ Open. 2022 Oct 5;12(10):e064402. doi: 10.1136/bmjopen-2022-064402 (PMC9535154; doi:10.1136/bmjopen-2022-064402), 2022-10-05

## Appendices

**Appendix - Table 1. NTS urgency levels and response times**

| NTS Urgency level                             | Definition                                | Response time                      | Medical help                              |
|-----------------------------------------------|-------------------------------------------|------------------------------------|-------------------------------------------|
| U0 – Resuscitation                            | Loss of vital functions                   | Immediately                        | Ambulance                                 |
| U1 – Life threatening                         | Unstable vital functions                  | Immediately, within 15 minutes     | Ambulance                                 |
| U2 – Emergent                                 | Vital functions in danger or organ damage | As soon as possible, within 1 hour | Home visit by GP or appointment at OHS-PC |
| U3 – Urgent                                   | Possible risk of damage, human reasons    | A few hours (<3 hours)             | Home visit by GP or appointment at OHS-PC |
| U4 – Non-urgent                               | Marginal risk of damage                   | 24 hours                           | Appointment at OHS-PC or telephone advice |
| U5 – Advice                                   | No risk of damage                         | Advice, no time related            | Telephone advice                          |
| GP: general practitioner                      |                                           |                                    |                                           |
| NTS: Netherlands Triage Standard              |                                           |                                    |                                           |
| OHS-PC: out-of-hours services in primary care |                                           |                                    |                                           |

**Appendix-table 2: Combinations of NTS triage criteria that generate an U1 level within the NTS main complaints that can be used for patients with chest discomfort.**

|                                                                                                                                                                                                                                                                                                                                                                                                              |                                                                                               |                                                                                                                                                                                                                                                            |                                                      |
|--------------------------------------------------------------------------------------------------------------------------------------------------------------------------------------------------------------------------------------------------------------------------------------------------------------------------------------------------------------------------------------------------------------|-----------------------------------------------------------------------------------------------|------------------------------------------------------------------------------------------------------------------------------------------------------------------------------------------------------------------------------------------------------------|------------------------------------------------------|
| → ABCD unstable (no main complaint is selected)                                                                                                                                                                                                                                                                                                                                                              |                                                                                               |                                                                                                                                                                                                                                                            | <b>Urgency level U1: ambulance within 15 minutes</b> |
| Main complaint 'Chest pain'                                                                                                                                                                                                                                                                                                                                                                                  |                                                                                               |                                                                                                                                                                                                                                                            |                                                      |
| → ABCD stable                                                                                                                                                                                                                                                                                                                                                                                                | AND severe chest pain (Numeric Rating Scale (NRS)-score $\geq 8$ ) lasting less than 12 hours |                                                                                                                                                                                                                                                            |                                                      |
| → ABCD stable                                                                                                                                                                                                                                                                                                                                                                                                | AND mild (NRS $\leq 4$ ) to moderate (NRS 5-7) chest pain lasting for less than 12 hours      | AND one of the following:<br>- retrosternal located pain<br>- tightening or pressing<br>- radiation to jaw, arm or upper back<br>- progressive pain intensity in short time<br>- past or present autonomous nervous system-related symptoms<br>- dizziness |                                                      |
| Main complaint 'Collapse'                                                                                                                                                                                                                                                                                                                                                                                    |                                                                                               |                                                                                                                                                                                                                                                            |                                                      |
| → ABCD stable                                                                                                                                                                                                                                                                                                                                                                                                | AND collapse                                                                                  | AND chest pain of any severity                                                                                                                                                                                                                             |                                                      |
| Main complaint 'Back complaints'                                                                                                                                                                                                                                                                                                                                                                             |                                                                                               |                                                                                                                                                                                                                                                            |                                                      |
| → ABCD stable                                                                                                                                                                                                                                                                                                                                                                                                | AND severe upper back pain (NRS $\geq 8$ )                                                    | AND past or present autonomous nervous system-related symptoms                                                                                                                                                                                             |                                                      |
| <p>ABCD: acronym for Airway, Breathing, Circulation and Disability. When the triage nurse starts the telephone triage with the NTS, the system requires a mandatory 'ABCD-check'; i.e. the triage nurse has to ask questions to assess whether the patient has life-threatening problems concerning the Airway, Breathing, Circulation and Disability for which an ambulance should be sent immediately.</p> |                                                                                               |                                                                                                                                                                                                                                                            |                                                      |

**Appendix-table 3. Characteristics of patients divided among the seven OHS-PC locations.**

| Characteristics         | Location A<br>N=205<br>(9.4%) | Location B<br>N=355<br>(16.2%) | Location C<br>N=544<br>(24.8%) | Location D<br>N=262<br>(12.0%) | Location E<br>N=164<br>(7.5%) | Location F<br>N=412<br>(18.8%) | Location G<br>N=250<br>(11.4%) |
|-------------------------|-------------------------------|--------------------------------|--------------------------------|--------------------------------|-------------------------------|--------------------------------|--------------------------------|
| Prevalence of ACS (n,%) | 32 (15.4%)                    | 31 (8.7%)                      | 59 (10.8%)                     | 35 (13.4%)                     | 15 (9.1%)                     | 53 (12.9%)                     | 26 (10.4%)                     |
| Male sex (n,%)          | 77 (37.6%)                    | 154 (43.4%)                    | 256 (47.1%)                    | 108 (41.2%)                    | 84 (51.2%)                    | 188 (45.6%)                    | 112 (44.8%)                    |
| Mean age in years (SD)  | 62.3 (19.6)                   | 58.6 (19.8)                    | 58.0 (19.4)                    | 56.6 (18.9)                    | 61.8 (20.5)                   | 61.6 (19.4)                    | 56.1 (18.7)                    |

**Appendix – table 4. Overview of the percentages of missing predictors, divided into patients with and without the diagnosis ACS.**

| Characteristics<br>N=2192                      | ACS, n=251<br>(11.5%)<br>Missing (%) | No ACS, n=1941<br>(88.5%)<br>Missing (%) |
|------------------------------------------------|--------------------------------------|------------------------------------------|
| Mean in years age (SD)                         | 0                                    | 0                                        |
| Female sex                                     | 0                                    | 0                                        |
| Median call duration in min (IQR)              | 0                                    | 0                                        |
| Mean patient's introduction in min (IQR)       | 0                                    | 0                                        |
| Triage nurse consulted the GP                  | 0                                    | 0                                        |
| Someone else called on behalf of patient       | 0                                    | 0                                        |
| The person who calls expressed concerns        | 144 (57.3)                           | 943 (48.6)                               |
| Cardiovascular disease or risk factor combined | 30 (12.0)                            | 318 (16.4)                               |
| History of coronary artery disease             | 107 (42.6)                           | 933 (48.1)                               |
| Diabetes                                       | 162 (64.5)                           | 1126 (58.0)                              |
| Hypertension                                   | 172 (68.5)                           | 1126 (58.0)                              |
| Hypercholesterolemia/statin use                | 172 (68.5)                           | 1196 (61.6)                              |
| Cardiac arrhythmia                             | 176 (70.1)                           | 1110 (57.2)                              |
| Chest pain                                     | 4 (1.6)                              | 72 (3.7)                                 |

|                                                                                                                                                                                                                                                     |            |             |
|-----------------------------------------------------------------------------------------------------------------------------------------------------------------------------------------------------------------------------------------------------|------------|-------------|
| Shortness of breath                                                                                                                                                                                                                                 | 68 (27.1)  | 429 (22.1)  |
| Chest pain duration <12 hours                                                                                                                                                                                                                       | 28 (11.2)  | 242 (13.1)  |
| Pain intensity severe (NRS >7 in range 1-10)                                                                                                                                                                                                        | 149 (59.4) | 1124 (57.9) |
| Pressing heavy pain*                                                                                                                                                                                                                                | 63 (25.1)  | 502 (25.9)  |
| Stabbing chest pain*                                                                                                                                                                                                                                | 63 (25.1)  | 502 (25.9)  |
| Chest pain located retrosternal**                                                                                                                                                                                                                   | 87 (34.7)  | 538 (27.7)  |
| Chest pain located left or right on thorax**                                                                                                                                                                                                        | 87 (34.7)  | 538 (27.7)  |
| Radiation of chest pain to any location                                                                                                                                                                                                             | 38 (15.1)  | 476 (24.5)  |
| Radiation to the arm ***                                                                                                                                                                                                                            | 94 (37.5)  | 1019 (52.5) |
| Radiation to the shoulder blades ***                                                                                                                                                                                                                | 94 (37.5)  | 1019 (52.5) |
| Radiation to the jaws ***                                                                                                                                                                                                                           | 94 (37.5)  | 1019 (52.5) |
| Sweating                                                                                                                                                                                                                                            | 79 (31.5)  | 747 (38.5)  |
| Nausea or vomiting                                                                                                                                                                                                                                  | 133 (53.0) | 1071 (55.2) |
| Pallor or ashen skin                                                                                                                                                                                                                                | 158 (62.9) | 1361 (70.1) |
| (Near) fainting                                                                                                                                                                                                                                     | 33 (13.1)  | 217 (11.2)  |
| Palpitations                                                                                                                                                                                                                                        | 225 (89.6) | 1615 (83.2) |
| Patient recognizes symptoms from previous cardiac event                                                                                                                                                                                             | 139 (55.4) | 1137 (58.6) |
| *Pain described by patient. Pressing heavy pain: pressing, heavy or tightening pain vs. other types of pain (stabbing, burning, cramping, tearing) Stabbing pain: stabbing vs. other types of pain (pressing, heavy, tightening, burning, cramping) |            |             |
| ** Retrosternal location vs. other pain locations. Left or right side thorax vs. other pain locations                                                                                                                                               |            |             |
| *** Radiation location vs. no radiation and radiation other pain                                                                                                                                                                                    |            |             |

**Appendix-table 5. Patient and call characteristics of 3,204 patients with chest discomfort calling OHS-PC between 2014-2017, comparing patients with and without information on the study outcome.**

| Characteristics<br>N=3,204                             | Follow-up<br>n= 2192 (68.4%) | No follow-up<br>n= 1012 (31.6%) | P-value |
|--------------------------------------------------------|------------------------------|---------------------------------|---------|
| <b>Patient characteristics</b>                         |                              |                                 |         |
| Median age in years (IQR) (n=3,204)                    | 59.1 (19.5)                  | 57.3 (20.4)                     | 0.020   |
| Female sex (n=3,204)                                   | 1213 (55.3)                  | 565 (55.8)                      | 0.794   |
| <b>Call characteristics</b>                            |                              |                                 |         |
| Median total call duration in min (IQR) (n=3,204)      | 6:51 (4:59-9:23)             | 6:56 (5:04-9:15)                | 0.836   |
| Mean patient's introduction in min (IQR) (n=3,204)     | 0:17 (0:11-0:25)             | 0:17 (0:11-0:26)                | 0.052   |
| Triage nurse consulted the GP (n=3,204)                | 1147 (52.3)                  | 519 (51.3)                      | 0.583   |
| Someone else called on behalf of patient (n=3,204)     | 1114 (50.8)                  | 479 (47.3)                      | 0.066   |
| Person who calls expressed concerns (n=1,478)          | 988 (89.7)                   | 430 (90.1)                      | 0.804   |
| <b>Medical history and risk factors</b>                |                              |                                 |         |
| Cardiovascular disease or CV risk factor (n=2,672)     | 1192 (64.6)                  | 515 (62.3)                      | 0.254   |
| History of coronary artery disease (n=1,663)           | 389 (33.8)                   | 166 (32.4)                      | 0.573   |
| Diabetes (n=1,283)                                     | 180 (19.9)                   | 68 (18.0)                       | 0.432   |
| Hypertension (n=1,274)                                 | 323 (36.1)                   | 121 (31.9)                      | 0.150   |
| Hypercholesterolemia/statin use (n=1,176)              | 212 (25.7)                   | 88 (25.1)                       | 0.842   |
| Cardiac arrhythmia (n=1,326)                           | 230 (25.4)                   | 102 (24.3)                      | 0.684   |
| <b>Symptoms</b>                                        |                              |                                 |         |
| Chest pain (n=3,079)                                   | 1981 (93.6)                  | 894 (92.8)                      | 0.417   |
| Shortness of breath (n=2,505)                          | 1094 (64.5)                  | 520 (64.3)                      | 0.911   |
| Chest pain duration <12 hours (n=2,793)                | 1403 (73.2)                  | 610 (69.6)                      | 0.052   |
| Severe pain (NRS >7 in range 1-10) (n=1,351)           | 337 (36.6)                   | 185 (43.0)                      | 0.024   |
| Pressing, heavy pain* (n=2,347)                        | 1023 (62.9)                  | 444 (61.6)                      | 0.538   |
| Stabbing chest pain* (n=2,349)                         | 366 (22.5)                   | 177 (24.5)                      | 0.280   |
| Chest pain located retrosternal** (n=2,298)            | 641 (40.9)                   | 294 (40.2)                      | 0.736   |
| Chest pain located left or right on thorax** (n=2,299) | 627 (40.0)                   | 294 (40.2)                      | 0.945   |
| Radiation of chest pain to any location (n=2,437)      | 1077 (64.3)                  | 458 (60.1)                      | 0.047   |
| Radiation to the arm ***(n=1,521)                      | 452 (42.2)                   | 179 (39.8)                      | 0.373   |

|                                                                   |             |            |       |
|-------------------------------------------------------------------|-------------|------------|-------|
| Radiation to the shoulder blades *** (n=1,519)                    | 326 (30.5)  | 136 (30.2) | 0.924 |
| Radiation to the jaws *** (n=1,984)                               | 124 (11.6)  | 41 (9.1)   | 0.156 |
| Sweating (n=1,758)                                                | 559 (40.9)  | 259 (42.0) | 0.638 |
| Nausea or vomiting (n=1,474)                                      | 489 (49.5)  | 229 (47.1) | 0.381 |
| Pallor or ashen skin (n=1,007)                                    | 322 (47.8)  | 136 (40.8) | 0.038 |
| (Near) fainting (n=2,855)                                         | 143 (7.4)   | 72 (7.8)   | 0.678 |
| Palpitations (n=501)                                              | 284 (80.7)  | 125 (83.9) | 0.396 |
| Patient recognizes symptoms from previous cardiac event (n=1,298) | 250 (27.3)  | 102 (26.7) | 0.819 |
| <b>Urgency allocation</b>                                         |             |            |       |
| High urgency (U1 or U2) (n=3,204)                                 | 1496 (68.2) | 661 (65.3) | 0.100 |
| U1                                                                | 974 (44.5)  | 390 (38.6) |       |
| U2                                                                | 522 (23.8)  | 271 (26.8) |       |
| Low urgency (U3 or U4 or U5)                                      | 696 (31.8)  | 351 (34.7) |       |

**Appendix - Table 6. Base model with age and sex for predicting the diagnosis ACS.**

| Predictors                                                  | Regression coefficients (standard error) |
|-------------------------------------------------------------|------------------------------------------|
| Intercept                                                   | - 14.671 (3.442)                         |
| Age                                                         | 0.289 (0.079)                            |
| Age'                                                        | - 0.379 (0.123)                          |
| Age''                                                       | 1.017 (0.386)                            |
| Female sex                                                  | 2.155 (5.385)                            |
| Age * Female sex                                            | - 0.084 (0.123)                          |
| Age' * Female sex                                           | 0.175 (0.190)                            |
| Age'' * Female sex                                          | - 0.532 (0.589)                          |
| Apparent c-statistic 0.72 (95% CI 0.70-0.75)                |                                          |
| Adjusted c-statistic 0.72 (95% CI 0.68-0.75)                |                                          |
| Calibration slope 0.977 (95% CI 0.617-1.338)                |                                          |
| Calibration 0.016 (95% CI -0.702-0.734)                     |                                          |
| R <sup>2</sup> 0.065                                        |                                          |
| Knots for cubic spline functions placed at 5, 35, 65 and 95 |                                          |

**Appendix - Table 7. Full model including all candidate predictors for predicting the diagnosis ACS**

| Predictors                                                                                                                                                                                                                                                               | Regression coefficients (standard error) |
|--------------------------------------------------------------------------------------------------------------------------------------------------------------------------------------------------------------------------------------------------------------------------|------------------------------------------|
| Intercept                                                                                                                                                                                                                                                                | -15.914 (3.55)                           |
| Age                                                                                                                                                                                                                                                                      | 0.288 (0.081)                            |
| Age'                                                                                                                                                                                                                                                                     | -0.388 (0.126)                           |
| Age''                                                                                                                                                                                                                                                                    | 1.058 (0.396)                            |
| Female gender                                                                                                                                                                                                                                                            | 2.459 (5.519)                            |
| Age * Female sex                                                                                                                                                                                                                                                         | -0.094 (0.126)                           |
| Age' * Female sex                                                                                                                                                                                                                                                        | 0.187 (0.195)                            |
| Age'' * Female sex                                                                                                                                                                                                                                                       | -0.554 (0.606)                           |
| Chest pain                                                                                                                                                                                                                                                               | -0.064 (0.365)                           |
| Acute chest pain (< 12 hours)                                                                                                                                                                                                                                            | 0.258 (0.200)                            |
| Shortness of breath                                                                                                                                                                                                                                                      | -0.141 (0.200)                           |
| Sweating                                                                                                                                                                                                                                                                 | 0.459 (0.183)                            |
| Retrosternal located pain                                                                                                                                                                                                                                                | 0.178 (0.177)                            |
| Radiation of chest pain                                                                                                                                                                                                                                                  | 0.617 (0.180)                            |
| Pressing heavy feeling                                                                                                                                                                                                                                                   | 0.619 (0.272)                            |
| Stabbing pain                                                                                                                                                                                                                                                            | -0.200 (0.353)                           |
| History of cardiovascular disease*                                                                                                                                                                                                                                       | -0.039 (0.247)                           |
| History of coronary artery disease                                                                                                                                                                                                                                       | 0.108 (0.234)                            |
| Someone else calls instead of the patient                                                                                                                                                                                                                                | 0.197 (0.160)                            |
| Patient calls during the night (0am-9am)                                                                                                                                                                                                                                 | 0.495 (0.152)                            |
| Apparent c-statistic 0.79 (95% CI 0.76-0.81)<br>Adjusted c-statistic 0.77 (95% CI 0.74-0.80)<br>Calibration slope 0.818 (95% CI 0.650-0.986)<br>Calibration -0.238 (-0.621-0.145)<br>R <sup>2</sup> 0.107<br>Knots for cubic spline functions placed at 5, 35, 65 and 95 |                                          |



Appendix – Figure 1. Calibration of full model with internal external validation

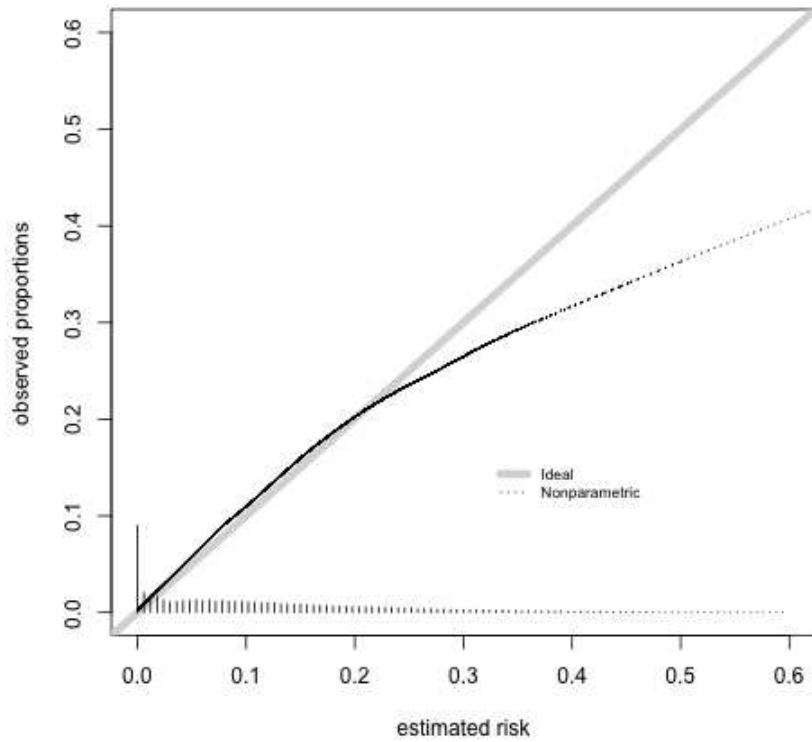

Supplement: bmjopen-2022-064402supp001.pdf [file bmjopen-2022-064402supp001.pdf]
