# Supplementary material for: Development and validation of a prediction rule for patients suspected of acute coronary syndrome in primary care: a cross-sectional study
Source: PubMed Central journal article supplement — BMJ Open. 2022 Oct 5;12(10):e064402. doi: 10.1136/bmjopen-2022-064402 (PMC9535154; doi:10.1136/bmjopen-2022-064402), 2022-10-05
Supplement: bmjopen-2022-064402.draft_revisions.pdf [file bmjopen-2022-064402.draft_revisions.pdf]

# BMJ Open

BMJ Open is committed to open peer review. As part of this commitment we make the peer review history of every article we publish publicly available.

When an article is published we post the peer reviewers' comments and the authors' responses online. We also post the versions of the paper that were used during peer review. These are the versions that the peer review comments apply to.

The versions of the paper that follow are the versions that were submitted during the peer review process. They are not the versions of record or the final published versions. They should not be cited or distributed as the published version of this manuscript.

BMJ Open is an open access journal and the full, final, typeset and author-corrected version of record of the manuscript is available on our site with no access controls, subscription charges or pay-per-view fees (<http://bmjopen.bmj.com>).

If you have any questions on BMJ Open's open peer review process please email [info.bmjopen@bmj.com](mailto:info.bmjopen@bmj.com)

# BMJ Open

## Development and validation of a prediction rule for patients suspected of acute coronary syndrome in primary care: a cross-sectional study

|                               |                                                                                                                                                                                                                                                                                                                                                                                                                                                                                                                                                                                                                                                                                                                                                                                                                                                                                                           |
|-------------------------------|-----------------------------------------------------------------------------------------------------------------------------------------------------------------------------------------------------------------------------------------------------------------------------------------------------------------------------------------------------------------------------------------------------------------------------------------------------------------------------------------------------------------------------------------------------------------------------------------------------------------------------------------------------------------------------------------------------------------------------------------------------------------------------------------------------------------------------------------------------------------------------------------------------------|
| Journal:                      | <i>BMJ Open</i>                                                                                                                                                                                                                                                                                                                                                                                                                                                                                                                                                                                                                                                                                                                                                                                                                                                                                           |
| Manuscript ID                 | bmjopen-2022-064402                                                                                                                                                                                                                                                                                                                                                                                                                                                                                                                                                                                                                                                                                                                                                                                                                                                                                       |
| Article Type:                 | Original research                                                                                                                                                                                                                                                                                                                                                                                                                                                                                                                                                                                                                                                                                                                                                                                                                                                                                         |
| Date Submitted by the Author: | 17-May-2022                                                                                                                                                                                                                                                                                                                                                                                                                                                                                                                                                                                                                                                                                                                                                                                                                                                                                               |
| Complete List of Authors:     | Wouters, Loes; Julius Center for Health Sciences and Primary Care, General Practice<br>Zwart, D.L; Julius Center for Health Sciences and Primary Care, General Practice<br>Erkelens, Daphne; Julius Center for Health Sciences and Primary Care, General practice<br>Adriaansen, Elisabeth; Julius Center for Health Sciences and Primary Care, General Practice<br>den Ruijter, Hester; Utrecht University, Experimental Cardiology<br>De Groot, Esther; Utrecht University, Julius Center for health sciences and primary care<br>Damoiseaux, Roger; Julius Center for Health Sciences and Primary Care, General practice<br>Hoes, Arno; Julius Center for Health Sciences and Primary Care, General practice<br>van Smeden, Maarten; Julius Center for Health Sciences and Primary Care, Methodology department<br>Rutten, Frans; Julius Center for Health Sciences and Primary Care, General Practice |
| Keywords:                     | PRIMARY CARE, Myocardial infarction < CARDIOLOGY, Telemedicine < BIOTECHNOLOGY & BIOINFORMATICS                                                                                                                                                                                                                                                                                                                                                                                                                                                                                                                                                                                                                                                                                                                                                                                                           |
|                               |                                                                                                                                                                                                                                                                                                                                                                                                                                                                                                                                                                                                                                                                                                                                                                                                                                                                                                           |

SCHOLARONE™  
Manuscripts

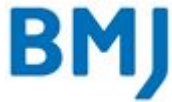

I, the Submitting Author has the right to grant and does grant on behalf of all authors of the Work (as defined in the below author licence), an exclusive licence and/or a non-exclusive licence for contributions from authors who are: i) UK Crown employees; ii) where BMJ has agreed a CC-BY licence shall apply, and/or iii) in accordance with the terms applicable for US Federal Government officers or employees acting as part of their official duties; on a worldwide, perpetual, irrevocable, royalty-free basis to BMJ Publishing Group Ltd ("BMJ") its licensees and where the relevant Journal is co-owned by BMJ to the co-owners of the Journal, to publish the Work in this journal and any other BMJ products and to exploit all rights, as set out in our [licence](#).

The Submitting Author accepts and understands that any supply made under these terms is made by BMJ to the Submitting Author unless you are acting as an employee on behalf of your employer or a postgraduate student of an affiliated institution which is paying any applicable article publishing charge ("APC") for Open Access articles. Where the Submitting Author wishes to make the Work available on an Open Access basis (and intends to pay the relevant APC), the terms of reuse of such Open Access shall be governed by a Creative Commons licence – details of these licences and which [Creative Commons](#) licence will apply to this Work are set out in our licence referred to above.

Other than as permitted in any relevant BMJ Author's Self Archiving Policies, I confirm this Work has not been accepted for publication elsewhere, is not being considered for publication elsewhere and does not duplicate material already published. I confirm all authors consent to publication of this Work and authorise the granting of this licence.

1  
2  
3 **Development and validation of a prediction rule for patients suspected of acute coronary syndrome in**  
4 **primary care: a cross-sectional study**  
5  
6  
7

8 **Wouters LTCM<sup>1</sup>, Zwart DLM<sup>1</sup>, Erkelens DCA<sup>1</sup>, Adriaansen EJM<sup>1</sup>, Den Ruijter HM<sup>2</sup>, de Groot E<sup>1</sup>,**  
9 **Damoiseaux RAMJ<sup>1</sup>, Hoes AW<sup>1,3</sup>, van Smeden M<sup>3</sup>, Rutten FH<sup>1</sup>**  
10  
11  
12

- 13 1. Dept. General Practice, Julius Centre for Health Sciences and Primary Care, University Medical  
14 Centre Utrecht, Utrecht University, Utrecht, the Netherlands  
15  
16 2. Laboratory of Exp. Cardiology, University Medical Centre Utrecht, Utrecht University, Utrecht, the  
17 Netherlands  
18  
19 3. Dept. Epidemiology, Julius Centre for Health Sciences and Primary Care, University Medical Centre,  
20 Utrecht University, Utrecht, the Netherlands  
21  
22  
23  
24  
25  
26

27 **Corresponding author:** L.T. Wouters, MD, PhD

28 Dept. General Practice, Julius Centre for Health Sciences and Primary Care, University Medical Centre  
29 Utrecht, Utrecht University, STR 6.131, PO Box 85500, 3508 GA Utrecht, The Netherlands

30  
31 Phone number: +31 (0)88 75 51470

32  
33 Email: [L.T.C.Wouters-2@umcutrecht.nl](mailto:L.T.C.Wouters-2@umcutrecht.nl)  
34  
35  
36

37 **Word count: 3697**

38 **Abstract count: 249**  
39  
40  
41  
42  
43  
44  
45  
46  
47  
48  
49  
50  
51  
52  
53  
54  
55  
56  
57  
58  
59  
60

## Abstract

**Objective** To develop and validate a symptom-based prediction rule for early recognition of acute coronary syndrome (ACS) in patients with acute chest discomfort who call out-of-hours services for primary care (OHS-PC).

**Design** Cross-sectional study. A diagnostic prediction rule was developed with multivariable regression analyses. All models were validated with internal-external cross validation within seven OHS-PC locations. Both age and sex were analysed as statistical interaction terms, applying for age non-linear effects.

**Setting** Seven OHS-PC in the Netherlands.

**Participants** 2,192 patients who called OHS-PC for acute chest discomfort (pain, pressure, tightness, or discomfort) between 2014 and 2017. Backed up recordings of telephone triage conversations were analysed.

**Primary and secondary outcomes measures** Diagnosis of ACS retrieved from the patient's medical records in general practice, including hospital specialists discharge letters. Performance of the prediction rules was calculated with the c-statistic and the final model was chosen based on net benefit analyses.

**Results** Among the 2,192 patients who called the OHS-PC with acute chest discomfort, 8.3% females and 15.3% males had an ACS. The final diagnostic model included seven predictors (sex, age, acute onset of chest pain lasting less than 12 hours, a pressing/heavy character of the pain, radiation of the pain, sweating, and calling at night). It had an adjusted c-statistic of 0.77 (95% CI 0.74-0.79) with good calibration.

**Conclusion** The final prediction model for ACS has good discrimination and calibration, and shows promise for replacing the existing telephone triage rules for patients with acute chest discomfort in general practice and OHS-PC.

**Trial registration** NTR7331

**Key words:** prediction rules, acute coronary syndrome, sex, symptoms, general practice, out-of-hours primary care

### Strengths and limitations of this study

- We could analyse the original and very first telephone conversation of patients with acute chest discomfort.
- The developed prediction model is well generalizable to other OHS-PCs in the Netherlands, but also to similar OHS-PC settings in other countries or even emergency medical service settings.
- A limitation is that fully external validation of the model in another OHS-PC was impossible because no other cohort similar to ours was available.
- Another limitation is that the effects of the predictors were assumed to be similar for males and females while this is not exactly the case, but by incorporating a differential non-linear effect of age and interaction with sex in the analyses this effect is minimized.

## Introduction

Chest discomfort is among the top five reasons for telephone contact in out-of-hours services for primary care (OHS-PC) and concerns 5% of all cases at the emergency department (ED) in the USA.<sup>1</sup> In the Netherlands, around 80% of patients with chest discomfort first call the general practitioner (GP) or OHS-PC, while 20% directly calls the emergency medical service (EMS, or ambulance dispatch centre) or are self-referrals to the ED.<sup>2</sup> Adequate triage and early diagnosis in these patients is vital, because in case of an underlying acute coronary syndrome (ACS) early effective therapeutic interventions ('time is muscle') improve the patient's outcome and prognosis.<sup>3</sup> For the diagnosis of ACS, a 12-lead electrocardiogram (ECG) and troponin testing is needed.<sup>3</sup> However, before the patient is referred to an ED where these diagnostic tests can be done, patient selection is necessary based on symptom presentation retrieved by telephone triage.<sup>4,5</sup> Symptom-based differentiation of ACS from other causes of chest discomfort is notoriously difficult.<sup>6</sup> Symptom-based prediction rules for diagnosing ACS in general practice and other prehospital settings are -although highly needed- scarce.<sup>7-9</sup> The efficiency and safety of telephone triage in OHS-PC was poor in a population with a prior chance of ACS of 8.3% in females and 15.3% in males; almost 50% of the males and females with chest discomfort received a high priority ambulance, while 11% diagnosed with an ACS did not received a high urgency (i.e., was seen within one hour).<sup>10</sup>

Most prediction rules for diagnosing ACS were developed in the ED setting, and include results from ECG and troponin testing.<sup>11</sup> Such prediction rules cannot be straightforward implemented for telephone triage in general practice because (i) in the latter setting these diagnostic tests are not available, (ii) the prior chance of ACS is rather low, and (iii) on average disease severity is less than in those seen in the ED.<sup>12,13</sup> The prevalence of ACS among patients with chest discomfort who call OHS-PC or EMS is about 10-15%, and among those seen at the ED between 10 to 30%.<sup>10,11,13,14</sup> Only one prediction rule was developed in primary care for diagnosing ACS; the modified Grijseels prediction rule, which had moderate discriminative ability (c-statistic of 0.66) after external validation.<sup>7,8</sup> Five other primary care prediction rules were developed to predict CAD; e.g. the Marburg Heart Score (MHS) and INTERCHEST prediction rule (International Working Group on Chest Pain in Primary Care).<sup>9</sup> In these studies both patients with acute and non-acute chest discomfort were included and the prevalence of stable CAD showed to be 10.9% to 12.6%, while that of ACS was only 1.5% to 2.5%.<sup>9</sup> Thus, these prediction rules have limited applicability for specifically diagnosing ACS.

1  
2  
3 In most OHS-PC and about half of the EMS in the Netherlands, triage nurses use the semi-automatic  
4 'Netherlands Triage Standard' (NTS) as a decision support tool to classify the urgency of the patient's  
5 condition. Triage nurses have to choose one out of 56 'main complaints' and based on answers linked to  
6 the triage criteria, the NTS automatically proposes one out of six levels of urgency, that is, a certain time  
7 frame in which patients should be seen (U0-U5, appendix- table 1). The NTS is a modified and shortened  
8 version of the Manchester Triage Standard which was developed in the ED setting.<sup>15</sup> Although the NTS  
9 was explicitly developed for telephone triage, it has not yet been validated against clinical outcomes  
10 even though it is already implemented on large scale. Recent research showed that the NTS had a poor  
11 sensitivity of 0.73 (95% CI 0.68-0.78) for telephone triage of patients with acute chest discomfort. The  
12 NTS recommended a low urgency (U3, U4 or U5) to 27% of patients who eventually showed to have an  
13 ACS or other life threatening event (LTE).<sup>10</sup> The NTS' specificity was also poor with 0.43 (95% CI 0.40-  
14 0.45); the NTS recommended a high urgency to 57% of the patients who eventually showed not to have  
15 an ACS or LTE. Given this poor safety and efficiency of the NTS, there is an urgent need for a better  
16 prediction model for patients with acute chest discomfort calling OHS-PC. In addition, there is a need for  
17 exploring sex-specificity of such prediction rule as there is an ongoing debate on whether females differ  
18 from males in reporting symptoms of ACS.<sup>16 17</sup>

19  
20  
21  
22  
23  
24  
25  
26  
27  
28  
29  
30  
31  
32 The aim of this study was to develop, and internal-external cross validate a symptom-based prediction  
33 rule for diagnosing ACS which is considerate to sex categories in male and female patients who call the  
34 OHS-PC for acute chest discomfort.

### 35 36 37 38 **Methods**

39  
40 We performed a cross-sectional study among 2,192 patients who called one out of seven participating  
41 OHS-PC in the Netherlands because of acute chest discomfort (pain, pressure, tightness, or discomfort)  
42 during the period 2014 to 2017.<sup>18</sup> These OHS-PC serve a total population of 1.5 million people and cover  
43 around 300,000 calls a year. We first selected calls based on of the International Code for Primary Care  
44 (ICPC; a WHO world-wide code system for primary care) with ICPC-codes K01, K02, K03, K24, K74, K75,  
45 K76, K77, K93, L04, P74, R02, R98 and calls with keywords thoracic pain, chest pain, myocardial  
46 infarction, heart attack and their common abbreviations (Figure 1). We included a broad variety of  
47 symptoms to capture the entire domain of patients that could be suspected of ACS. We listed all  
48 available calls of these patients and assigned random numbers with the Random Number Generator  
49 (RAND) function in Microsoft Excel to retrieve a random sample. Calls were excluded before re-listening



1  
2  
3 when the patients' age was below 18 years or when the patient did not live in the surrounding area of  
4 the OHS-PC (in which case we could not retrieve the final diagnosis from the patient's own general  
5 practitioner). Calls were excluded during re-listening when it did not concern a triage call (e.g. inter-  
6 collegial consultation) or when the recording was of poor quality (Figure 1).  
7  
8  
9

### 10 11 *Candidate predictors*

12 Research team members (LW, DE) and medical students listened to the call recordings, blinded for the  
13 outcome, to collect data about symptoms, medical history and urgency allocation. Patient (age, sex) and  
14 call characteristics (call time, call duration) were collected from the OHS-PC electronic medical files of  
15 the patients. As candidate predictors we included age and sex, the NTS triage criteria (see appendix-  
16 table 2), the ACS predictors from the modified Grijseels prediction model (male sex, radiation, nausea,  
17 sweating and history of CAD), the 'CAD predictors' from MHS and INTERCHEST prediction models (age,  
18 pain feels like pressure, CAD history or CV risk factors, patient assumes cardiac origin of pain), and -  
19 based on a recent own study in OHS-PC- the predictor 'calling at night between 0am and 9am'.<sup>7-9 19</sup>  
20  
21  
22  
23  
24  
25  
26  
27

### 28 *Outcome*

29 The primary outcome was the diagnosis ACS. The final diagnoses were retrieved from the patient's GP,  
30 and based on the GP's electronic medical files which include ED and cardiologist discharge letters and  
31 notes from the OHS-PC contact. The diagnosis ACS was nearly always made by a cardiologist (96.0%) and  
32 included information on levels of (high-sensitivity) troponin and electrocardiographic results. We used  
33 medical information up to 30-days following the contact with the OHS-PC to allow us to include  
34 diagnoses of ACS that were initially missed because the patient was not referred to the cardiologist the  
35 same day of the OHS-PC contact. However, in none of the patients in the study we had evidence of a  
36 missed diagnosis of ACS.  
37  
38  
39  
40  
41  
42  
43  
44

### 45 *Sample size calculation*

46 We relied on the minimal sample size criteria for prediction model development proposed by Riley et al,  
47 using the 'pmsampsize' package in R.<sup>20</sup> Based on an ACS prevalence of overall 11% and an Cox-Snell R-  
48 squared of 0.075 (a conservative value based on a model with age and sex) and a total number of 2,192  
49 observations we were allowed to assess 19 candidate predictors.<sup>21</sup> Based on sample size calculations we  
50 concluded that development of separate models for males and females would require a significantly  
51 larger sample, therefore we analysed sex as a statistical interaction term.<sup>20</sup>  
52  
53  
54  
55  
56  
57  
58  
59  
60

### *Statistical analyses*

We developed three diagnostic models using multivariable logistic regression analysis. First, we developed a base model with only age and sex as predictors, where age was modelled using a restricted cubic spline function (4 knots) and an interaction with sex. This resulted in a base model with 7 predictor parameters (excluding the intercept). Second, we fitted a full model with an additional 12 pre-selected binary predictors (having chest pain, acute chest pain shorter than 12 hours, shortness of breath, sweating, retrosternal located chest pain, radiation, pressing heavy pain, stabbing pain, history of CVD, history of CAD, someone else calling, calling at night). Thirdly, we applied backward elimination, with a cut-off p-value  $< 0.20$  for including predictors (a higher cut-off value to lower the chances of overfitting).

<sup>21</sup>

We applied internal-external cross validation (IECV) for model validation using the seven different OHS-PC locations (Appendix-Table 3 for patient characteristics of different OHS-PC locations).<sup>22</sup> We evaluated the IECV performance in terms of the area under the ROC curve (c-statistic), the calibration slope and calibration in the large. The IECV estimates of performance were combined by using random-effect model (DerSimonian-Laird estimator). Based on the IECV we also constructed flexible calibration curves and decision curves. In the decision curve analyses we compared the final model with the currently used NTS triage model in OHS-PC in the Netherlands.<sup>23</sup> Finally, we created an illustrative table of diagnostic test accuracy for various model-based risk thresholds of the final model, following the example in Wynants et al.<sup>23</sup> IECV estimates for risk threshold specific sensitivity and specificity, and we applied a bivariate model commonly used for diagnostic test accuracy meta-analysis.<sup>24</sup>

### *Missing data*

For missing data we carried out multiple imputation using the Multivariate Imputation via Chained Equation (MICE) package in R, with 30 imputation rounds and 30 iterations.<sup>25</sup> We pooled the results following Rubin's rules.<sup>26</sup> Predictors with over 50% missing were excluded from consideration in the models (Appendix-table 4 for details about the missing data). Characteristics were compared between patients with and without information on the medical outcome - because some GPs refused diagnosis retrieval from their files - to allow for assessment of differences in characteristics between these patient groups (Appendix-table 5). There were no clinically meaningful differences in symptoms and patient or call characteristics between the 2,192 patients with information on the outcome, and the 1,012 patients

about whom knowledge of the medical outcome related to the OHS-PC contact because of acute chest discomfort was missing.

All analyses were done in R version 4.0.3. (2020-10-10) with the Regression Modelling Strategies ('rms') package in R.<sup>27</sup> We reported our study in accordance to the Transparent Reporting of a multivariable prediction rules for Individual Prognosis Or Diagnosis (TRIPOD) criteria (Supplementary file).<sup>28</sup>

### *Patient and Public Involvement*

No patients were involved in defining the research question or the outcome measures. Neither they were involved in developing plans for design. However, they participated in the discussion on implications and the implementation strategy. In addition, they were asked to advise on interpretation and writing up of the results. Results will be shared and discussed in more detail with representatives of the Dutch national patient community of cardiovascular diseases ('Harteraad').

### **Results**

Among the 2,192 callers with acute chest discomfort (mean age 59.1 (SD 19.5) years and 55.3% females) 251 (11.5%) had a final diagnosis of ACS; 101 (8.3%) females and 150 (15.3%) males (Table 1). Patients with ACS were older than those without (mean age 69.7 (SD 13.4) vs. 57.7 (SD 19.8) years) and females with ACS were on average older than men with ACS (73.8 (SD 13.5) years vs. 67.0 (SD 12.6) years).

**Table 1. Characteristics of 2,192 patients who called OHS PC with acute chest discomfort between 2014-2017, divided between females and males with and without ACS.**

| Characteristics                     | 1,213 females (55.3%) |                        | 979 males (44.7%) |                       |
|-------------------------------------|-----------------------|------------------------|-------------------|-----------------------|
|                                     | ACS n=101 (8.3%)      | No ACS n=1,112 (91.7%) | ACS n=150 (15.3%) | No ACS n= 829 (84.7%) |
| <b>Patient characteristics</b>      |                       |                        |                   |                       |
| Mean age in years (SD)              | 73.8 (13.5)           | 58.0 (20.2)            | 67.0 (12.6)       | 57.2 (19.2)           |
| <b>Call characteristics</b>         |                       |                        |                   |                       |
| Median call duration in min (IQR)   | 5:27 (3:57-8:24)      | 6:59 (5:06-9:47)       | 6:04 (4:03-8:17)  | 6:56 (5:10-9:23)      |
| Mean introduction time in min (IQR) | 0:13 (0:09-0:18)      | 0:17 (0:11-0:26)       | 0:14 (0:09-0:21)  | 0:17 (0:11-0:25)      |
| Call during the night (0am-9am)     | 34 (33.7)             | 304 (27.3)             | 62 (41.3)         | 188 (22.7)            |

1

2

3

4

5

6

7

8

9

10

11

12

13

14

15

16

17

18

19

20

21

22

23

24

25

26

27

28

29

30

31

32

33

34

35

36

37

38

39

40

41

42

43

44

45

46

47

48

49

50

51

52

53

54

55

56

57

58

59

60

|                                                         |            |             |            |            |
|---------------------------------------------------------|------------|-------------|------------|------------|
| Triage nurse consulted the GP                           | 43 (42.6)  | 580 (52.2)  | 75 (50.0)  | 449 (54.2) |
| Someone else called on behalf of patient                | 69 (68.3)  | 515 (46.3)  | 98 (65.3)  | 432 (52.1) |
| The person who calls expressed concerns                 | 42 (95.5)  | 507 (90.5)  | 61 (96.8)  | 378 (87.1) |
| <b>Medical history and risk factors</b>                 |            |             |            |            |
| Cardiovascular disease or CV risk factors               | 70 (81.4)  | 552 (61.1)  | 106 (78.5) | 464 (64.4) |
| History of coronary artery disease                      | 23 (47.9)  | 131 (24.2)  | 54 (56.3)  | 181 (38.8) |
| Diabetes                                                | 14 (42.4)  | 66 (14.3)   | 22 (39.3)  | 78 (22.0)  |
| Hypertension                                            | 26 (72.2)  | 162 (34.0)  | 22 (51.2)  | 113 (33.3) |
| Hypercholesterolemia/statin use                         | 10 (40.0)  | 96 (22.6)   | 27 (50.0)  | 79 (24.5)  |
| Cardiac arrhythmia                                      | 4 (14.8)   | 125 (26.2)  | 12 (25.0)  | 89 (25.2)  |
| <b>Symptoms</b>                                         |            |             |            |            |
| Chest pain                                              | 95 (96.9)  | 1007 (94.1) | 139 (93.3) | 758 (94.9) |
| Shortness of breath                                     | 57 (71.3)  | 559 (65.4)  | 63 (61.2)  | 415 (63.1) |
| Chest pain duration <12 hours                           | 74 (86.0)  | 703 (72.3)  | 113 (82.5) | 510 (71.3) |
| Severe pain intensity severe (NRS >7, range 1-10)       | 19 (61.3)  | 184 (39.6)  | 18 (25.4)  | 116 (33.0) |
| Pressing/heavy chest pain*                              | 58 (81.7)  | 525 (62.5)  | 95 (81.2)  | 345 (57.7) |
| Stabbing chest pain*                                    | 8 (11.3)   | 190 (22.6)  | 9 (7.7)    | 159 (26.6) |
| Chest pain located retrosternal**                       | 36 (54.5)  | 326 (40.0)  | 52 (53.1)  | 227 (38.7) |
| Chest pain located on left or right of the thorax**     | 19 (28.8)  | 318 (39.0)  | 28 (28.6)  | 262 (44.6) |
| Radiation of chest pain to any location                 | 74 (86.0)  | 575 (67.8)  | 83 (65.4)  | 347 (56.2) |
| Radiation to the arm ***                                | 37 (43.0)  | 218 (25.7)  | 54 (42.5)  | 143 (23.2) |
| Radiation to the shoulder blades ***                    | 14 (16.3)  | 190 (22.4)  | 19 (15.0)  | 103 (16.7) |
| Radiation to the jaws ***                               | 10 (11.6)  | 77 (9.1)    | 4 (3.1)    | 33 (5.3)   |
| Sweating                                                | 36 (52.9)  | 279 (42.0)  | 54 (51.9)  | 190 (35.8) |
| Nausea or vomiting                                      | 24 (52.2)  | 295 (56.6)  | 31 (43.1)  | 139 (39.9) |
| Pallor or ashen skin                                    | 22 (59.5)  | 139 (44.3)  | 36 (64.3)  | 125 (46.8) |
| (Near) fainting                                         | 8 (9.5)    | 76 (7.7)    | 9 (6.7)    | 50 (6.7)   |
| Palpitations                                            | 10 (100.0) | 183 (84.7)  | 8 (50.0)   | 83 (75.5)  |
| Patient recognizes symptoms from previous cardiac event | 17 (35.4)  | 100 (22.0)  | 30 (46.9)  | 103 (29.5) |
| <b>Urgency allocation</b>                               |            |             |            |            |

1  
2  
3  
4  
5  
6  
7  
8  
9

|                              |           |            |            |            |
|------------------------------|-----------|------------|------------|------------|
| High urgency (U1 or U2)      | 89 (88.1) | 740 (66.5) | 133 (88.7) | 534 (64.4) |
| U1                           | 75 (74.3) | 443 (39.8) | 106 (70.7) | 350 (42.2) |
| U2                           | 14 (13.9) | 297 (26.7) | 27 (18.0)  | 184 (22.2) |
| Low urgency (U3 or U4 or U5) | 12 (11.9) | 372 (33.5) | 17 (11.3)  | 295 (35.6) |

10 \*Pain described by patient. Pressing heavy pain: pressing, heavy or tightening pain vs. other types of pain (stabbing, burning, cramping,  
 11 tearing) Stabbing pain: stabbing vs. other types of pain (pressing, heavy, tightening, burning, cramping)  
 12  
 13 \*\* Retrosternal location vs. other pain locations. Left or right side of the thorax vs. other pain locations  
 14 \*\*\* Radiation location vs. no radiation and radiation other pain  
 15

16  
17  
18  
19  
20  
21  
22  
23

Over two thirds of all callers (68.3%) received a high urgency allocation (seen within one hour; U1 or U2) and among the 251 patients who showed to have an ACS, 88.4% received a high urgency allocation. Calls of patients who had an ACS were shorter than calls in those without ACS (median call duration 6:34 (SD 3:38) vs. 7:42 (SD 3:48) minutes).

24  
25

#### *Medical history and symptoms*

26  
27  
28  
29  
30  
31  
32  
33  
34  
35  
36  
37  
38  
39  
40  
41  
42

Females and males with ACS had more often a history with CVD or CV risk factors than those without (females with ACS 81.4% vs. females without ACS 61.1%, males with ACS 78.5% vs. males without ACS 64.4%) (Table 2). The majority of both females and males had chest pain (94.5%) and this was similar among those with and without ACS. Overall, presented symptoms among males and females calling the OHS-PC for chest discomfort were quite similar. Symptoms associated with ACS in both sexes were pressing/heavy chest pain (females with ACS 81.7% vs. females without ACS 62.5%, males 81.2% vs. 57.7% respectively), retrosternal located chest pain (females 54.5% vs. 40.0%, males 53.1% vs. 38.7%), radiation of pain (females 86.0% vs 67.8%, males 65.4% vs 56.2%), and sweating (females 52.9% vs. 42.0%, males 51.9% vs. 35.8%).

43  
44

#### *Diagnoses*

45  
46  
47  
48  
49  
50  
51  
52

Of the 101 females with ACS, 22.8% had a ST-segment elevation myocardial infarction (STEMI), 46.5% a non ST-segment elevation myocardial infarction (NSTEMI), 19.8% unstable angina pectoris (UAP), and 10.9% non-classified ACS. In 150 males with ACS, 33.3% had a STEMI, 36.7% a NSTEMI, 26.0% UAP, and 4.0% non-classified ACS (Table 2).

53  
54  
55  
56  
57  
58  
59  
60

**Table 2. Diagnoses of 2,192 males and females who contacted the OHS-PC for acute chest discomfort between 2014-2017, by sex.**

| Diagnosis, n (%)                                                                                                                                                                                                                                                                                                                                                                                                                                                                                                                                                                                                                                                                                                                                                                                                                                                                                       | Females<br>n= 1213 | Males<br>n= 979 | p-value |
|--------------------------------------------------------------------------------------------------------------------------------------------------------------------------------------------------------------------------------------------------------------------------------------------------------------------------------------------------------------------------------------------------------------------------------------------------------------------------------------------------------------------------------------------------------------------------------------------------------------------------------------------------------------------------------------------------------------------------------------------------------------------------------------------------------------------------------------------------------------------------------------------------------|--------------------|-----------------|---------|
| <b>Acute coronary syndrome*</b>                                                                                                                                                                                                                                                                                                                                                                                                                                                                                                                                                                                                                                                                                                                                                                                                                                                                        | 101 (8.3)          | 150 (15.3)      | <0.001  |
| <b>STEMI</b>                                                                                                                                                                                                                                                                                                                                                                                                                                                                                                                                                                                                                                                                                                                                                                                                                                                                                           | 23 (22.8)          | 50 (33.3)       | 0.071   |
| <b>NSTEMI</b>                                                                                                                                                                                                                                                                                                                                                                                                                                                                                                                                                                                                                                                                                                                                                                                                                                                                                          | 47 (46.5)          | 55 (36.7)       | 0.119   |
| <b>UAP</b>                                                                                                                                                                                                                                                                                                                                                                                                                                                                                                                                                                                                                                                                                                                                                                                                                                                                                             | 20 (19.8)          | 39 (26.0)       | 0.256   |
| <b>Non-classified ACS</b>                                                                                                                                                                                                                                                                                                                                                                                                                                                                                                                                                                                                                                                                                                                                                                                                                                                                              | 11 (10.9)          | 6 (4.0)         | 0.033   |
| <b>Life threatening events (LTEs)</b>                                                                                                                                                                                                                                                                                                                                                                                                                                                                                                                                                                                                                                                                                                                                                                                                                                                                  | 28 (2.3)           | 37 (3.8)        | 0.043   |
| <b>Pulmonary embolism</b>                                                                                                                                                                                                                                                                                                                                                                                                                                                                                                                                                                                                                                                                                                                                                                                                                                                                              | 8 (28.6)           | 10 (27.0)       | 0.890   |
| <b>Acute abdominal aneurysm</b>                                                                                                                                                                                                                                                                                                                                                                                                                                                                                                                                                                                                                                                                                                                                                                                                                                                                        | 2 (7.1)            | 3 (8.1)         | 0.885   |
| <b>Thoracic aortic dissection</b>                                                                                                                                                                                                                                                                                                                                                                                                                                                                                                                                                                                                                                                                                                                                                                                                                                                                      | 1 (3.6)            | 4 (10.8)        | 0.278   |
| <b>Other**</b>                                                                                                                                                                                                                                                                                                                                                                                                                                                                                                                                                                                                                                                                                                                                                                                                                                                                                         | 17 (60.7)          | 20 (54.1)       | 0.591   |
| <b>Non-urgent cardiovascular diseases***</b>                                                                                                                                                                                                                                                                                                                                                                                                                                                                                                                                                                                                                                                                                                                                                                                                                                                           | 223 (18.4)         | 191 (19.5)      | 0.069   |
| <b>Musculoskeletal pain</b>                                                                                                                                                                                                                                                                                                                                                                                                                                                                                                                                                                                                                                                                                                                                                                                                                                                                            | 245 (20.2)         | 148 (15.2)      | 0.039   |
| <b>Non-cardiac chest pain, not further specified ****</b>                                                                                                                                                                                                                                                                                                                                                                                                                                                                                                                                                                                                                                                                                                                                                                                                                                              | 191 (15.7)         | 179 (18.3)      | 0.012   |
| <b>Psychogenic disorders</b>                                                                                                                                                                                                                                                                                                                                                                                                                                                                                                                                                                                                                                                                                                                                                                                                                                                                           | 165 (13.6)         | 85 (8.7)        | 0.005   |
| <b>Gastrointestinal tract disorders</b>                                                                                                                                                                                                                                                                                                                                                                                                                                                                                                                                                                                                                                                                                                                                                                                                                                                                | 89 (7.3)           | 68 (6.9)        | 0.776   |
| <b>Respiratory tract disorders</b>                                                                                                                                                                                                                                                                                                                                                                                                                                                                                                                                                                                                                                                                                                                                                                                                                                                                     | 61 (5.2)           | 56 (5.7)        | 0.203   |
| <b>Other non-urgent diagnoses*****</b>                                                                                                                                                                                                                                                                                                                                                                                                                                                                                                                                                                                                                                                                                                                                                                                                                                                                 | 110 (9.1)          | 65 (6.6)        | 0.152   |
| <p>* Almost all patients (96.0%) were diagnosed by a cardiologist. Ten (4.0%) ACS patients were not diagnosed by a cardiologist; four died before arrival of the ambulance, one patient died after resuscitation at the ED (all these five were classified as acute cardiac death due to ACS), and in five patients the ACS diagnosis was solely based on the GP's interpretation in patients who were not referred to the hospital after shared decision because of a short life expectancy due to cancer in a palliative stage.</p> <p>** Stroke, severe COPD exacerbation, acute severe heart failure, sepsis, coronary spasm caused by hypokalaemia, diabetic ketoacidosis, epileptic insult, bleeding from oesophageal varices, ovarian torsion, ventricular fibrillation.</p> <p>*** Stable angina pectoris (including atypical chest pain), stable heart failure, arrhythmias, hypertension</p> |                    |                 |         |

\*\*\*\* Cardiac pathology unlikely after cardiologist's or GP's diagnostic work-up, but without differential diagnosis

\*\*\*\*\* Amongst others: anaemia, carcinoma, vasovagal collapse, side effects medication, dermatological diseases (e.g. herpes Zoster infection)

Twenty-eight (2.3%) females and 37 males (3.8%) had another life-threatening event than ACS (e.g. pulmonary embolism, thoracic aortic dissection, acute abdominal aneurysm). All other patients (85.6%) had non-urgent medical conditions such as non-urgent cardiovascular disease (18.9%), musculoskeletal pain (17.9%), non-cardiac chest pain (not further specified) (16.9%), psychogenic disorder (11.4%), gastrointestinal disorders (7.2%), respiratory disorders (5.3%), and other non-urgent diagnoses (8.0%).

#### *Model development, performance and validation*

The base model with sex and age had an apparent c-statistic of 0.72 (95% CI 0.70-0.75), and an internal-external validation based c-statistic of 0.72 (95% 0.68-0.75) (Appendix- Table 6, Figure 2). The full model including all candidate predictors had an apparent c-statistic of 0.79 (95% CI 0.76-0.81) and an internal-external validation based c-statistic of 0.77 (95% CI 0.74-0.80) (Appendix - Table 7). The full model had optimal calibration (flexible line close to the 45-degree reference line) up to a predicted probability of ACS of approximately 0.2 (Appendix-Figure 1). Risks higher than 0.2 tended to be overestimated by the model, however since any plausible risk threshold will be lower than 0.2 in the primary care setting, we find the calibration in the relevant range to be satisfactory. After backward elimination, the backward model had an apparent c-statistic of 0.79 (95% CI 0.76-0.81), and the internal-external validation c-statistic was 0.77 (95% CI 0.74-0.79). It had very similar calibration to the full model (Table 3, Figure 3).

**Table 3. Final model for predicting the diagnosis ACS.**

| Predictors          | Regression coefficients (standard error) |
|---------------------|------------------------------------------|
| Intercept           | -16.246 (3.527)                          |
| Age                 | 0.293 (0.081)                            |
| Age'                | -0.391 (0.125)                           |
| Age''               | 1.063 (0.395)                            |
| Female gender       | 2.504 (5.512)                            |
| Age * female gender | -0.096 (0.126)                           |

|                                                             |                |
|-------------------------------------------------------------|----------------|
| Age' * female gender                                        | 0.189 (0.195)  |
| Age'' * female gender                                       | -0.556 (0.605) |
| Acute chest pain shorter than 12 hours                      | 0.290 (0.198)  |
| Sweating                                                    | 0.457 (0.178)  |
| Radiation of chest pain                                     | 0.609 (0.176)  |
| Pressing heavy pain                                         | 0.747 (0.200)  |
| Call during the night (0am-9am)                             | 0.504 (0.151)  |
| Apparent c-statistic 0.79 (95% CI 0.76-0.81)                |                |
| Adjusted c-statistic 0.77 (95% CI 0.74-0.79)                |                |
| Calibration slope 0.826 (95% CI 0.658-0.994)                |                |
| Calibration -0.224 (95% CI -0.604-0.157)                    |                |
| R <sup>2</sup> 0.106                                        |                |
| Knots for cubic spline functions placed at 5, 35, 65 and 95 |                |

### *Decision curve analyses and risk thresholds*

Both the full and backward model showed a high net benefit as compared to the currently used NTS model for telephone triage in OHS-PC (Appendix - Figure 2). There was no difference in net benefit between the full model and backward model across plausible risk thresholds. Based on this analysis we decided to choose the backward as the final triage tool model because; 1) with fewer predictors the prediction of ACS remained similar accurate and 2) no valuable time is lost during telephone triage by asking the patient about symptoms that do not contribute to a better prediction. The final model included besides age and sex, the five following predictors; (i) acute onset of chest pain lasting <12 hours, (ii) a pressing/heavy character, (iii) radiation of pain, (iv) sweating, (v) calling at night between 0.00 and 9.00am. Finally, we evaluated the diagnostic performance of the final prediction model across risk thresholds that may be chosen to apply in clinical practice (Appendix- Table 8, Appendix – Figure 3).

### **Discussion**

This is the first study that developed and internal-external validated a symptom-based prediction rule for telephone triage of ACS in male and female patients who contact OHS-PC for acute chest discomfort (pain, pressure, tightness, or discomfort). ACS was present in 8.3% of the females and 15.3% of the males. The prediction rule is applicable for triage in the OHS-PC setting and consists of sex and age as



1  
2  
3 statistical interaction terms, and five other symptom-based predictors. It had a good discriminative  
4 ability (adjusted c-statistic 0.77 (95% CI 0.74-0.79)) and was well calibrated up to an ACS risk of 0.2.  
5  
6  
7

### 8 *Strengths and limitations*

9  
10 The major strength of this study is that we analysed the original and very first conversations of patients  
11 with acute chest discomfort with primary health care providers and assessed these talks without  
12 knowledge of the diagnosis; the assessment of symptoms was therefore not affected by hindsight bias  
13 caused by knowledge of the final diagnosis.<sup>29</sup> Furthermore, we could analyse a large sample (N=2,192)  
14 of patients which allowed us to evaluate up to nineteen candidate predictors. We assessed the risk of  
15 selection due to missing outcome data, and our data suggest that this missingness was unlikely to bias  
16 our findings. Because we used data from seven different OHS-PC our results will be well generalizable to  
17 other OHS-PC in the Netherlands, but we anticipate the model might be applicable to similar OHS-PC  
18 setting in for example the UK and Scandinavian countries. Our results may also be generalizable to some  
19 EMS settings, because the prior chance of having an ACS among those calling for acute chest discomfort  
20 is rather similar in the EMS setting as in the OHS-PC setting.<sup>14 30</sup>  
21  
22  
23  
24  
25  
26  
27  
28  
29

30 A limitation of the study is that the final model is not yet fully externally validated. However, at the time  
31 of executing the study hardly any primary care research data were available to perform such validation.  
32 Importantly, the internal-external validation showed very good calibration up to an ACS risk of 0.2.  
33 Another limitation is that the effects of the predictors were assumed to be similar for male and female  
34 patients while that might not be optimal for the predictions. However, development of separate models  
35 for males and females would require a significantly larger sample size than was available. Importantly, a  
36 differential non-linear effect of age was incorporated using a spline function and interaction with sex  
37 was incorporated, and the final internal-external validated model did have good overall performance.  
38  
39  
40  
41  
42  
43  
44

### 45 *Comparison with other studies*

46 Our prediction model had a higher discriminating ability for ACS than the NTS (c-statistic of 0.58) and  
47 modified Grijseels prediction rule (c-statistic of 0.66).<sup>7</sup> This may largely be explained by the addition of  
48 age, the strongest predictor of ACS. This is in line with the notion that the prevalence of ACS increases  
49 with age.<sup>7 9 31</sup> Importantly, in our study among people aged below 40, only one (0.4%) male patient had  
50 an ACS (UAP). Similar to the modified Grijseels prediction rule our prediction model includes sweating  
51 and radiation of pain, however, the modified Grijseels rule combined nausea and sweating to a single  
52  
53  
54  
55  
56  
57  
58  
59  
60

1  
2  
3 predictor (i.e., nausea or sweating).<sup>7 8</sup> Age and sex were predictors in our model, but also in the MHS  
4 and INTERCHEST prediction models.<sup>32 33</sup> Also the INTERCHEST rule included pressing heavy chest pain as  
5 predictor.<sup>32</sup> A new predictor is calling at night (between 0.00-9.00am).<sup>19</sup> Previous studies in the ED  
6 setting also showed circadian variability with an early morning peak for ACS patients.<sup>34</sup> Finally,  
7 symptoms associated with ACS were rather similar between females and males, which is in line with  
8 recent sex-stratified studies of patients with chest discomfort who called the OHS-PC, but is in contrast  
9 with the prevailing opinion.<sup>16 17 35</sup>

10  
11  
12  
13  
14  
15  
16 We performed decision curve analyses to investigate what would be the optimal threshold of ACS  
17 predicted probability to initiate treatment, where 'treatment' in pre-hospital setting refers to urgent  
18 referral for hospital admission (U1, ambulance within 15 minutes). Context is needed to determine an  
19 optimal threshold, which concerns what percentage of missing ACS is considered as acceptable by  
20 health care providers, patients and policymakers. This percentage is expected to be very low because a  
21 missed ACS can result in permanent cardiac impairment, heart failure, life-threatening arrhythmias in  
22 the early phase, and death.<sup>36</sup> Furthermore missing an ACS is the most common reason for malpractice  
23 claims worldwide.<sup>37</sup> A survey performed among 1,029 ED doctors in the US, New Zealand and Australia  
24 showed that they considered an average missing rate between 0.1-1% (range 0-10%) as acceptable.<sup>38</sup>  
25 When we apply a maximum of 1% missing with our prediction rules, the threshold has to be set at a  
26 predicted risk of ACS of 0.05 (negative predictive value of 0.99, Table 6), which means based on our data  
27 that the majority of patients needs urgent referral. This would result in over-crowded EMS and EDs, and  
28 with the available resources being limited, this may result in exceeding target triage times, which could  
29 compromise patient safety in another way.<sup>39</sup> A possible alternative to consider may be applying  
30 different 'treatments' per thresholds, i.e. dispatching an ambulance (U1) for the high predicted risk  
31 patients, and GP visit within one hour (U2) for the low predicted risk patients. During GP visit more  
32 clinical parameters (blood pressure, heart rate, overall clinical impression) can be gathered to improve  
33 ACS risk prediction, and in the future, there might be room for applying point-of-care high-sensitivity  
34 troponin testing, as these are nowadays only available in the ED setting.<sup>40</sup> In order to determine the  
35 ideal threshold, external validation will be needed combined with clinical and management  
36 considerations.

37  
38  
39  
40  
41  
42  
43  
44  
45  
46  
47  
48  
49  
50  
51  
52  
53 *Implications for clinical practice and future research*  
54  
55  
56  
57  
58  
59  
60

1  
2  
3 This symptom-based prediction model for ACS has good discrimination and calibration and could readily  
4 be applied for telephone triage of patients with acute chest discomfort in primary care, notably the  
5 OHS-PC setting. The results of the decision curve analysis showed a large net benefit over a range of  
6 plausible risk threshold as compared to the currently used NTS model in the OHS-PC in the Netherlands.  
7  
8 For future research, full external validation in other OHS-PC or EMS populations could further optimize  
9 and update the model. Furthermore, sex-specific prediction models could be developed for ACS, but  
10 given the overlap in symptoms between men and women, this would not result in major changes in  
11 predictors.  
12  
13  
14  
15  
16  
17

### 18 **Conclusion**

19  
20 The final prediction model for ACS has good discrimination and calibration, and shows promise for  
21 replacing the existing telephone triage rules for patients with acute chest discomfort in general practice  
22 and OHS-PC. However, full external validation should be considered.  
23  
24  
25  
26  
27  
28  
29  
30  
31  
32  
33  
34  
35  
36  
37  
38  
39  
40  
41  
42  
43  
44  
45  
46  
47  
48  
49  
50  
51  
52  
53  
54  
55  
56  
57  
58  
59  
60

### **Ethical approval**

The study (National Trial Register identification number: NTR7331) was approved by the Medical Ethics Committee Utrecht, the Netherlands (reference number WAG/mb/16/003208) and complied with the Declaration of Helsinki. A waiver of informed consent was given because our study had minimal risk to subjects and could otherwise not be carried out logistically. Personal and research data were handled and stored according to the European General Data Protection Regulation.

**Acknowledgements** The authors would like to thank the OHS-PC foundation 'Primair Huisartsenposten' and all employees of the participating locations for or their cooperation in this study, notably for providing data and technical support.

**Funding** This study was funded by an unrestricted grant from (i) the department of general practice of the University Medical Centre Utrecht, (ii) a personal promotion grant of D.L. Zwart, MD, PhD, (iii) the foundation 'The Netherlands Triage Standard', and (iv) the foundation 'Stoffels-Hornstra'. This study contributes to the 2020B004 IMPRESS study which is funded by the Dutch Heart Foundation/Dutch Cardiovascular Alliance (DHF/DCVA).

**Competing interest statement** All authors declare they have no conflict of interest. All authors have seen and agree with the contents of the manuscript and there is no financial interest to report. We certify that the submission is original work and is not under review at any other publication.

**Data sharing statement** Data can be made available for researchers whose proposed use of the data has been approved at request of the corresponding author, with a signed data access agreement.

**Author contribution** FR and DZ are the lead investigators who conceived the research idea and methodology. Funding acquisition was done by FR, DZ and RD. LW and DC conducted data acquisition. LW performed the analyses and wrote the first draft of the manuscript. She was supervised by FR and DZ, who critically revised the manuscript, and by MvS who was involved with the analyses. DC, EdG, LA, SP, HdR, AH and RD contributed to and approved of the final version of the manuscript.

## References

1. Rui P, Kang K. National Hospital Ambulatory Medical Care Survey: 2017 Emergency Department Summary Tables. In: Statistics NCfH, ed., 2017.
2. Mol KA, Smoczynska A, Rahel BM, et al. Non-cardiac chest pain: prognosis and secondary healthcare utilisation. *Open Heart* 2018;5(2):e000859. doi: 10.1136/openhrt-2018-000859
3. Collet JP, Thiele H, Barbato E, et al. 2020 ESC Guidelines for the management of acute coronary syndromes in patients presenting without persistent ST-segment elevation. *Rev Esp Cardiol (Engl Ed)* 2021;74(6):544. doi: 10.1016/j.rec.2021.05.002
4. Burman RA, Zakariassen E, Hunskaar S. Management of chest pain: a prospective study from Norwegian out-of-hours primary care. *BMC family practice* 2014;15:51. doi: 10.1186/1471-2296-15-51
5. Deakin CD, Sherwood DM, Smith A, et al. Does telephone triage of emergency (999) calls using Advanced Medical Priority Dispatch (AMPDS) with Department of Health (DH) call prioritisation effectively identify patients with an acute coronary syndrome? An audit of 42,657 emergency calls to Hampshire Ambulance Service NHS Trust. *Emergency medicine journal : EMJ* 2006;23(3):232-5. doi: 10.1136/emj.2004.022962
6. Bruyninckx R, Aertgeerts B, Bruyninckx P, et al. Signs and symptoms in diagnosing acute myocardial infarction and acute coronary syndrome: a diagnostic meta-analysis. *The British journal of general practice : the journal of the Royal College of General Practitioners* 2008;58(547):105-11. doi: 10.3399/bjgp08X277014
7. Bruins Slot MH, Rutten FH, van der Heijden GJ, et al. Diagnosing acute coronary syndrome in primary care: comparison of the physicians' risk estimation and a clinical decision rule. *Family practice* 2011;28(3):323-8. doi: 10.1093/fampra/cmq116
8. Grijseels EW, Deckers JW, Hoes AW, et al. Implementation of a pre-hospital decision rule in general practice. Triage of patients with suspected myocardial infarction. *European heart journal* 1996;17(1):89-95.
9. Harskamp RE, Laeven SC, Himmelreich JC, et al. Chest pain in general practice: a systematic review of prediction rules. *BMJ open* 2019;9(2):e027081. doi: 10.1136/bmjopen-2018-027081
10. Wouters LT, Rutten FH, Erkelens DC, et al. Accuracy of telephone triage in primary care patients with chest discomfort: a cross-sectional study. *Open Heart* 2020;7(2) doi: 10.1136/openhrt-2020-001376

- 1  
2  
3 11. Leite L, Baptista R, Leitaó J, et al. Chest pain in the emergency department: risk stratification with  
4 Manchester triage system and HEART score. *BMC cardiovascular disorders* 2015;15:48. doi:  
5 10.1186/s12872-015-0049-6  
6  
7
- 8 12. Leeflang MM, Rutjes AW, Reitsma JB, et al. Variation of a test's sensitivity and specificity with  
9 disease prevalence. *CMAJ : Canadian Medical Association journal = journal de l'Association  
10 medicale canadienne* 2013;185(11):E537-44. doi: 10.1503/cmaj.121286  
11  
12
- 13 13. Buntinx F, Knockaert D, Bruyninckx R, et al. Chest pain in general practice or in the hospital  
14 emergency department: is it the same? *Family practice* 2001;18(6):586-9.  
15
- 16 14. Rawshani A, Larsson A, Gelang C, et al. Characteristics and outcome among patients who dial for the  
17 EMS due to chest pain. *International journal of cardiology* 2014;176(3):859-65. doi:  
18 10.1016/j.ijcard.2014.08.004  
19  
20
- 21 15. Kuriyama A, Urushidani S, Nakayama T. Five-level emergency triage systems: variation in assessment  
22 of validity. *Emergency medicine journal : EMJ* 2017;34(11):703-10. doi: 10.1136/emered-2016-  
23 206295  
24  
25
- 26 16. van der Meer MG, Appelman Y, Rutten KHG, et al. Are there gender disparities in symptom  
27 presentation or triage of patients with chest discomfort at primary care out-of-hours services?  
28 An observational study. *BMJ open* 2019;9(11):e031613. doi: 10.1136/bmjopen-2019-031613  
29  
30
- 31 17. Wouters LTCM, Zwart DLM, Erkelens DCA, et al. Gender-stratified analyses of symptoms associated  
32 with acute coronary syndrome in telephone triage: a cross-sectional study. *BMJ open* 2021;11  
33 doi: 10.1136/bmjopen-2020-042406  
34  
35
- 36 18. Erkelens DC, Wouters LT, Zwart DL, et al. Optimisation of telephone triage of callers with symptoms  
37 suggestive of acute cardiovascular disease in out-of-hours primary care: observational design of  
38 the Safety First study. *BMJ open* 2019;9(7):e027477. doi: 10.1136/bmjopen-2018-027477  
39  
40
- 41 19. Wouters LT, Zwart DL, Erkelens DC, et al. Chest discomfort at night and risk of acute coronary  
42 syndrome: cross-sectional study of telephone conversations. *Family practice* 2020 doi:  
43 10.1093/fampra/cmaa005  
44  
45
- 46 20. Riley RD, Ensor J, Snell KIE, et al. Calculating the sample size required for developing a clinical  
47 prediction model. *BMJ* 2020;368:m441. doi: 10.1136/bmj.m441  
48  
49
- 50 21. van Smeden M, Moons KG, de Groot JA, et al. Sample size for binary logistic prediction models:  
51 Beyond events per variable criteria. *Stat Methods Med Res* 2019;28(8):2455-74. doi:  
52 10.1177/0962280218784726  
53  
54  
55  
56  
57  
58  
59  
60

- 1  
2  
3 22. Steyerberg EW, Harrell FE, Jr. Prediction models need appropriate internal, internal-external, and  
4 external validation. *Journal of clinical epidemiology* 2016;69:245-7. doi:  
5 10.1016/j.jclinepi.2015.04.005  
6  
7
- 8 23. Wynants L, van Smeden M, McLernon DJ, et al. Three myths about risk thresholds for prediction  
9 models. *BMC medicine* 2019;17(1):192. doi: 10.1186/s12916-019-1425-3  
10
- 11 24. Reitsma JB, Glas AS, Rutjes AW, et al. Bivariate analysis of sensitivity and specificity produces  
12 informative summary measures in diagnostic reviews. *Journal of clinical epidemiology*  
13 2005;58(10):982-90. doi: 10.1016/j.jclinepi.2005.02.022  
14  
15
- 16 25. Jolani S, Debray TP, Koffijberg H, et al. Imputation of systematically missing predictors in an  
17 individual participant data meta-analysis: a generalized approach using MICE. *Stat Med*  
18 2015;34(11):1841-63. doi: 10.1002/sim.6451  
19  
20
- 21 26. Rubin DB. Multiple imputation for non response in surveys. *John Wiley & Sons, Hoboken, NJ* 1987  
22
- 23 27. Harrell FE, Jr. Regression Modeling Strategies: With Applications to Linear Models, Logistic and  
24 Ordinal Regression, and Survival Analysis. . Second edition ed. Cham, Switzerland: Springer  
25 International 2015.  
26  
27
- 28 28. Moons KG, Altman DG, Reitsma JB, et al. Transparent Reporting of a multivariable prediction model  
29 for Individual Prognosis or Diagnosis (TRIPOD): explanation and elaboration. *Annals of internal*  
30 *medicine* 2015;162(1):W1-73. doi: 10.7326/M14-0698  
31  
32
- 33 29. Zwaan L, Monteiro S, Sherbino J, et al. Is bias in the eye of the beholder? A vignette study to assess  
34 recognition of cognitive biases in clinical case workups. *BMJ Qual Saf* 2017;26(2):104-10. doi:  
35 10.1136/bmjqs-2015-005014  
36  
37
- 38 30. Scott G, Clawson JJ, Gardett I, et al. 9-1-1 Triage of Non-Traumatic Chest Pain: Association with  
39 Hospital Diagnosis. *Prehosp Emerg Care* 2017;21(4):525-34. doi:  
40 10.1080/10903127.2017.1302530  
41  
42
- 43 31. Canto JG, Rogers WJ, Goldberg RJ, et al. Association of age and sex with myocardial infarction  
44 symptom presentation and in-hospital mortality. *Jama* 2012;307(8):813-22. doi:  
45 10.1001/jama.2012.199  
46  
47
- 48 32. International Working Group on Chest Pain in Primary C, Aerts M, Minalu G, et al. Pooled individual  
49 patient data from five countries were used to derive a clinical prediction rule for coronary artery  
50 disease in primary care. *Journal of clinical epidemiology* 2017;81:120-28. doi:  
51 10.1016/j.jclinepi.2016.09.011  
52  
53  
54  
55  
56  
57  
58  
59  
60

- 1  
2  
3 33. Haasenritter J, Donner-Banzhoff N, Bosner S. Chest pain for coronary heart disease in general  
4 practice: clinical judgement and a clinical decision rule. *The British journal of general practice :  
5 the journal of the Royal College of General Practitioners* 2015;65(640):e748-53. doi:  
6 10.3399/bjgp15X687385  
7  
8  
9  
10 34. Ekelund U, Akbarzadeh M, Khoshnood A, et al. Likelihood of acute coronary syndrome in emergency  
11 department chest pain patients varies with time of presentation. *BMC Res Notes* 2012;5:420.  
12 doi: 10.1186/1756-0500-5-420  
13  
14  
15 35. van Oosterhout REM, de Boer AR, Maas A, et al. Sex Differences in Symptom Presentation in Acute  
16 Coronary Syndromes: A Systematic Review and Meta-analysis. *J Am Heart Assoc*  
17 2020;9(9):e014733. doi: 10.1161/JAHA.119.014733  
18  
19  
20 36. Bugiardini R, Ricci B, Cenko E, et al. Delayed Care and Mortality Among Women and Men With  
21 Myocardial Infarction. *J Am Heart Assoc* 2017;6(8) doi: 10.1161/JAHA.117.005968 [published  
22 Online First: 2017/09/02]  
23  
24  
25 37. Ernesater A, Winblad U, Engstrom M, et al. Malpractice claims regarding calls to Swedish telephone  
26 advice nursing: what went wrong and why? *J Telemed Telecare* 2012;18(7):379-83. doi:  
27 10.1258/jtt.2012.120416  
28  
29  
30 38. Than M, Herbert M, Flaws D, et al. What is an acceptable risk of major adverse cardiac event in chest  
31 pain patients soon after discharge from the Emergency Department?: a clinical survey.  
32 *International journal of cardiology* 2013;166(3):752-4. doi: 10.1016/j.ijcard.2012.09.171  
33  
34  
35 39. van der Linden MC, Meester BE, van der Linden N. Emergency department crowding affects triage  
36 processes. *Int Emerg Nurs* 2016;29:27-31. doi: 10.1016/j.ienj.2016.02.003  
37  
38  
39 40. Pickering JW, Young JM, George PM, et al. Validity of a Novel Point-of-Care Troponin Assay for  
40 Single-Test Rule-Out of Acute Myocardial Infarction. *JAMA Cardiol* 2018;3(11):1108-12. doi:  
41 10.1001/jamacardio.2018.3368  
42  
43  
44  
45  
46  
47  
48  
49  
50  
51  
52  
53  
54  
55  
56  
57  
58  
59  
60



1  
2  
3 **Figure legends**

4 **Figure 1. Flowchart of study population.**

5  
6  
7 **Figure 2. Base model with age and sex for predicting diagnosis acute coronary syndrome.**

8  
9 **Figure 3. Calibration of final model with internal external validation.**

10  
11  
12  
13  
14  
15  
16  
17  
18  
19  
20  
21  
22  
23  
24  
25  
26  
27  
28  
29  
30  
31  
32  
33  
34  
35  
36  
37  
38  
39  
40  
41  
42  
43  
44  
45  
46  
47  
48  
49  
50  
51  
52  
53  
54  
55  
56  
57  
58  
59  
60

For peer review only

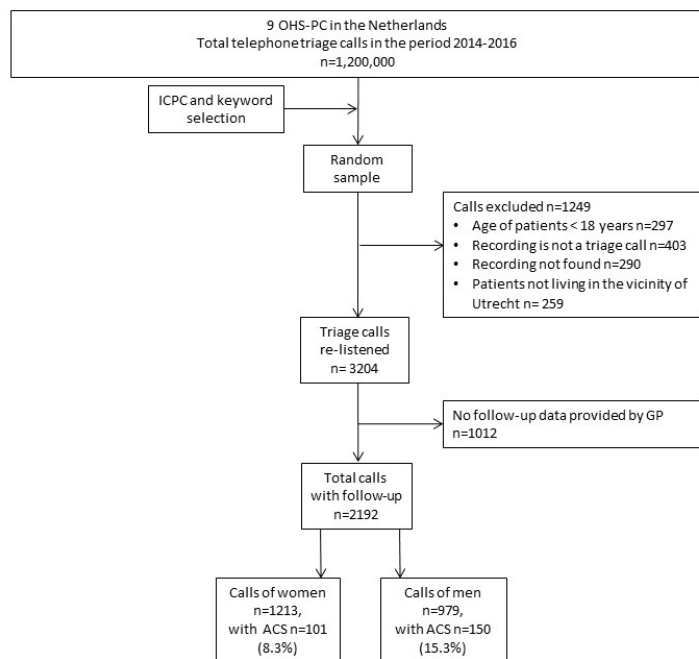

Figure 1

254x190mm (96 x 96 DPI)

1  
2  
3  
4  
5  
6  
7  
8  
9  
10  
11  
12  
13  
14  
15  
16  
17  
18  
19  
20  
21  
22  
23  
24  
25  
26  
27  
28  
29  
30  
31  
32  
33  
34  
35  
36  
37  
38  
39  
40  
41  
42  
43  
44  
45  
46  
47  
48  
49  
50  
51  
52  
53  
54  
55  
56  
57  
58  
59  
60

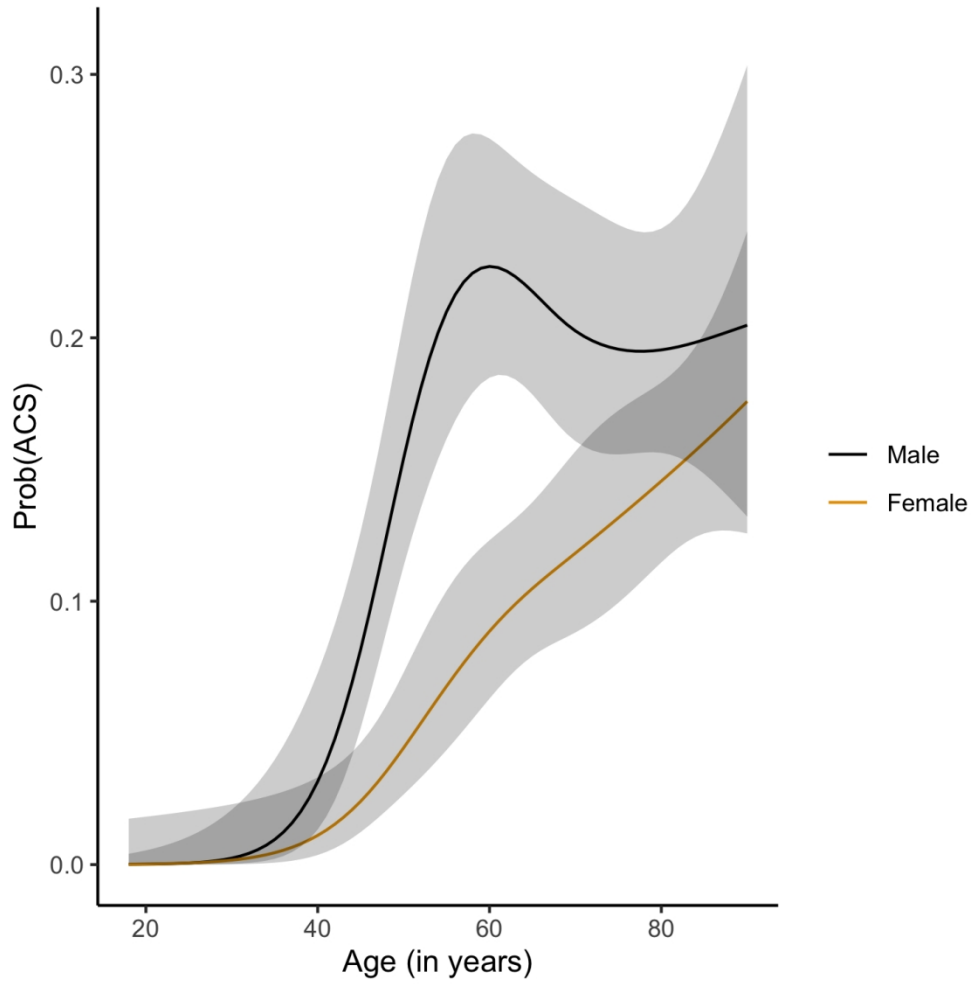

Figure 2

1360x1360mm (28 x 28 DPI)

1  
2  
3  
4  
5  
6  
7  
8  
9  
10  
11  
12  
13  
14  
15  
16  
17  
18  
19  
20  
21  
22  
23  
24  
25  
26  
27  
28  
29  
30  
31  
32  
33  
34  
35  
36  
37  
38  
39  
40  
41  
42  
43  
44  
45  
46  
47  
48  
49  
50  
51  
52  
53  
54  
55  
56  
57  
58  
59  
60

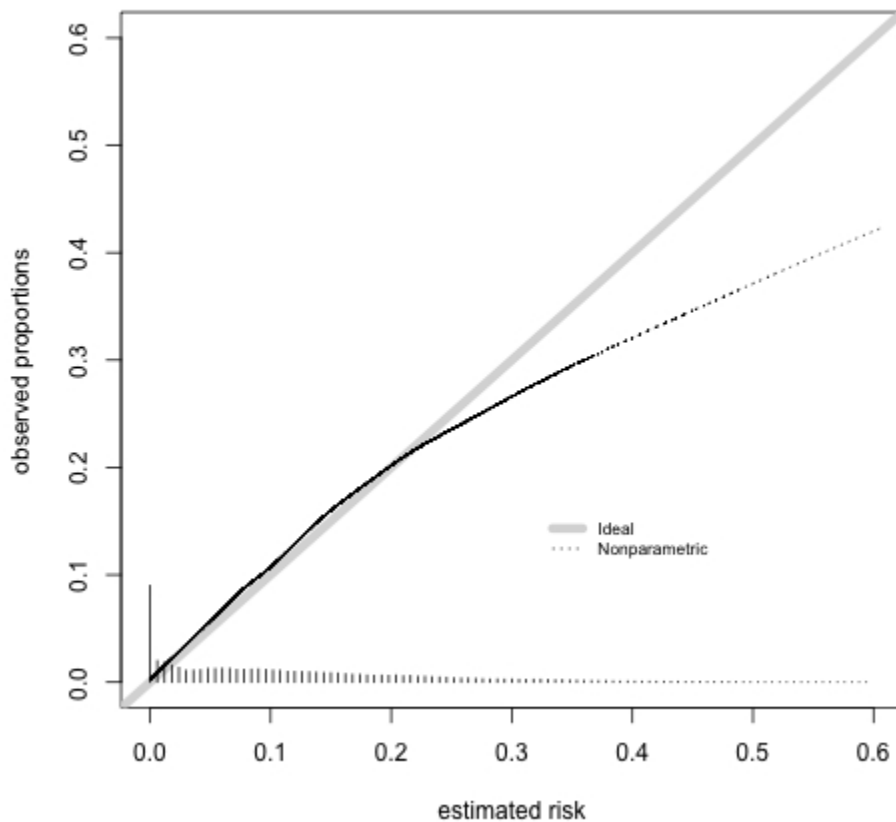

169x169mm (72 x 72 DPI)

## Appendices

**Appendix - Table 1. NTS urgency levels and response times**

| NTS Urgency level                             | Definition                                | Response time                      | Medical help                              |
|-----------------------------------------------|-------------------------------------------|------------------------------------|-------------------------------------------|
| U0 – Resuscitation                            | Loss of vital functions                   | Immediately                        | Ambulance                                 |
| U1 – Life threatening                         | Unstable vital functions                  | Immediately, within 15 minutes     | Ambulance                                 |
| U2 – Emergent                                 | Vital functions in danger or organ damage | As soon as possible, within 1 hour | Home visit by GP or appointment at OHS-PC |
| U3 – Urgent                                   | Possible risk of damage, human reasons    | A few hours (<3 hours)             | Home visit by GP or appointment at OHS-PC |
| U4 – Non-urgent                               | Marginal risk of damage                   | 24 hours                           | Appointment at OHS-PC or telephone advice |
| U5 – Advice                                   | No risk of damage                         | Advice, no time related            | Telephone advice                          |
| GP: general practitioner                      |                                           |                                    |                                           |
| NTS: Netherlands Triage Standard              |                                           |                                    |                                           |
| OHS-PC: out-of-hours services in primary care |                                           |                                    |                                           |

**Appendix-table 2: Combinations of NTS triage criteria that generate an U1 level within the NTS main complaints that can be used for patients with chest discomfort.**

|                                                                                                                                                                                                                                                                                                                                                                                                              |                                                                                               |                                                                                                                                                                                                                                                            |                                                      |
|--------------------------------------------------------------------------------------------------------------------------------------------------------------------------------------------------------------------------------------------------------------------------------------------------------------------------------------------------------------------------------------------------------------|-----------------------------------------------------------------------------------------------|------------------------------------------------------------------------------------------------------------------------------------------------------------------------------------------------------------------------------------------------------------|------------------------------------------------------|
| → ABCD unstable (no main complaint is selected)                                                                                                                                                                                                                                                                                                                                                              |                                                                                               |                                                                                                                                                                                                                                                            | <b>Urgency level U1: ambulance within 15 minutes</b> |
| Main complaint 'Chest pain'                                                                                                                                                                                                                                                                                                                                                                                  |                                                                                               |                                                                                                                                                                                                                                                            |                                                      |
| → ABCD stable                                                                                                                                                                                                                                                                                                                                                                                                | AND severe chest pain (Numeric Rating Scale (NRS)-score $\geq 8$ ) lasting less than 12 hours |                                                                                                                                                                                                                                                            |                                                      |
| → ABCD stable                                                                                                                                                                                                                                                                                                                                                                                                | AND mild (NRS $\leq 4$ ) to moderate (NRS 5-7) chest pain lasting for less than 12 hours      | AND one of the following:<br>- retrosternal located pain<br>- tightening or pressing<br>- radiation to jaw, arm or upper back<br>- progressive pain intensity in short time<br>- past or present autonomous nervous system-related symptoms<br>- dizziness |                                                      |
| Main complaint 'Collapse'                                                                                                                                                                                                                                                                                                                                                                                    |                                                                                               |                                                                                                                                                                                                                                                            |                                                      |
| → ABCD stable                                                                                                                                                                                                                                                                                                                                                                                                | AND collapse                                                                                  | AND chest pain of any severity                                                                                                                                                                                                                             |                                                      |
| Main complaint 'Back complaints'                                                                                                                                                                                                                                                                                                                                                                             |                                                                                               |                                                                                                                                                                                                                                                            |                                                      |
| → ABCD stable                                                                                                                                                                                                                                                                                                                                                                                                | AND severe upper back pain (NRS $\geq 8$ )                                                    | AND past or present autonomous nervous system-related symptoms                                                                                                                                                                                             |                                                      |
| <p>ABCD: acronym for Airway, Breathing, Circulation and Disability. When the triage nurse starts the telephone triage with the NTS, the system requires a mandatory 'ABCD-check'; i.e. the triage nurse has to ask questions to assess whether the patient has life-threatening problems concerning the Airway, Breathing, Circulation and Disability for which an ambulance should be sent immediately.</p> |                                                                                               |                                                                                                                                                                                                                                                            |                                                      |

**Appendix-table 3. Characteristics of patients divided among the seven OHS-PC locations.**

| Characteristics         | Location A                    | Location B                     | Location C                     | Location D                     | Location E                    | Location F                     | Location G                     |
|-------------------------|-------------------------------|--------------------------------|--------------------------------|--------------------------------|-------------------------------|--------------------------------|--------------------------------|
|                         | <b>N=205</b><br><b>(9.4%)</b> | <b>N=355</b><br><b>(16.2%)</b> | <b>N=544</b><br><b>(24.8%)</b> | <b>N=262</b><br><b>(12.0%)</b> | <b>N=164</b><br><b>(7.5%)</b> | <b>N=412</b><br><b>(18.8%)</b> | <b>N=250</b><br><b>(11.4%)</b> |
| Prevalence of ACS (n,%) | 32 (15.4%)                    | 31 (8.7%)                      | 59 (10.8%)                     | 35 (13.4%)                     | 15 (9.1%)                     | 53 (12.9%)                     | 26 (10.4%)                     |
| Male sex (n,%)          | 77 (37.6%)                    | 154 (43.4%)                    | 256 (47.1%)                    | 108 (41.2%)                    | 84 (51.2%)                    | 188 (45.6%)                    | 112 (44.8%)                    |
| Mean age in years (SD)  | 62.3 (19.6)                   | 58.6 (19.8)                    | 58.0 (19.4)                    | 56.6 (18.9)                    | 61.8 (20.5)                   | 61.6 (19.4)                    | 56.1 (18.7)                    |

**Appendix – table 4. Overview of the percentages of missing predictors, divided into patients with and without the diagnosis ACS.**

| Characteristics<br>N=2192                      | ACS, n=251<br>(11.5%)<br>Missing (%) | No ACS, n=1941<br>(88.5%)<br>Missing (%) |
|------------------------------------------------|--------------------------------------|------------------------------------------|
| Mean in years age (SD)                         | 0                                    | 0                                        |
| Female sex                                     | 0                                    | 0                                        |
| Median call duration in min (IQR)              | 0                                    | 0                                        |
| Mean patient's introduction in min (IQR)       | 0                                    | 0                                        |
| Triage nurse consulted the GP                  | 0                                    | 0                                        |
| Someone else called on behalf of patient       | 0                                    | 0                                        |
| The person who calls expressed concerns        | 57.3                                 | 48.6                                     |
| Cardiovascular disease or risk factor combined | 12.0                                 | 16.4                                     |
| History of coronary artery disease             | 42.6                                 | 48.1                                     |
| Diabetes                                       | 64.5                                 | 58.0                                     |
| Hypertension                                   | 68.5                                 | 58.0                                     |
| Hypercholesterolemia/statin use                | 68.5                                 | 61.6                                     |
| Cardiac arrhythmia                             | 70.1                                 | 57.2                                     |
| Chest pain                                     | 1.6                                  | 3.7                                      |

|                                                                                                                                                                                                                                                     |      |      |
|-----------------------------------------------------------------------------------------------------------------------------------------------------------------------------------------------------------------------------------------------------|------|------|
| Shortness of breath                                                                                                                                                                                                                                 | 27.1 | 22.1 |
| Chest pain duration <12 hours                                                                                                                                                                                                                       | 11.2 | 13.1 |
| Pain intensity severe (NRS >7 in range 1-10)                                                                                                                                                                                                        | 59.4 | 57.9 |
| Pressing heavy pain*                                                                                                                                                                                                                                | 25.1 | 25.9 |
| Stabbing chest pain*                                                                                                                                                                                                                                | 25.1 | 25.9 |
| Chest pain located retrosternal**                                                                                                                                                                                                                   | 34.7 | 27.7 |
| Chest pain located left or right on thorax**                                                                                                                                                                                                        | 34.7 | 27.7 |
| Radiation of chest pain to any location                                                                                                                                                                                                             | 15.1 | 24.5 |
| Radiation to the arm ***                                                                                                                                                                                                                            | 37.5 | 52.5 |
| Radiation to the shoulder blades ***                                                                                                                                                                                                                | 37.5 | 52.5 |
| Radiation to the jaws ***                                                                                                                                                                                                                           | 37.5 | 52.5 |
| Sweating                                                                                                                                                                                                                                            | 31.5 | 38.5 |
| Nausea or vomiting                                                                                                                                                                                                                                  | 53.0 | 55.2 |
| Pallor or ashen skin                                                                                                                                                                                                                                | 62.9 | 70.1 |
| (Near) fainting                                                                                                                                                                                                                                     | 13.1 | 11.2 |
| Palpitations                                                                                                                                                                                                                                        | 89.6 | 83.2 |
| Patient recognizes symptoms from previous cardiac event                                                                                                                                                                                             | 55.4 | 58.6 |
| *Pain described by patient. Pressing heavy pain: pressing, heavy or tightening pain vs. other types of pain (stabbing, burning, cramping, tearing) Stabbing pain: stabbing vs. other types of pain (pressing, heavy, tightening, burning, cramping) |      |      |
| ** Retrosternal location vs. other pain locations. Left or right side thorax vs. other pain locations                                                                                                                                               |      |      |
| *** Radiation location vs. no radiation and radiation other pain                                                                                                                                                                                    |      |      |



**Appendix-table 5. Patient and call characteristics of 3,204 patients with chest discomfort calling OHS-PC between 2014-2017, comparing patients with and without information on the study outcome.**

| Characteristics<br>N=3204                      | Follow-up<br>n= 2192 (68.4%) | No follow-up<br>n= 1012 (31.6%) | P-value |
|------------------------------------------------|------------------------------|---------------------------------|---------|
| <b>Patient characteristics</b>                 |                              |                                 |         |
| Median age in years (IQR)                      | 59.1 (19.5)                  | 57.3 (20.4)                     | 0.020   |
| Female sex                                     | 1213 (55.3)                  | 565 (55.8)                      | 0.794   |
| <b>Call characteristics</b>                    |                              |                                 |         |
| Median total call duration in min (IQR)        | 6:51 (4:59-9:23)             | 6:56 (5:04-9:15)                | 0.836   |
| Mean patient's introduction in min (IQR)       | 0:17 (0:11-0:25)             | 0:17 (0:11-0:26)                | 0.052   |
| Triage nurse consulted the GP                  | 1147 (52.3)                  | 519 (51.3)                      | 0.583   |
| Someone else called on behalf of patient       | 1114 (50.8)                  | 479 (47.3)                      | 0.066   |
| The person who calls expressed concerns        | 988 (89.7)                   | 430 (90.1)                      | 0.804   |
| <b>Medical history and risk factors</b>        |                              |                                 |         |
| Cardiovascular disease or risk factor combined | 1192 (64.6)                  | 515 (62.3)                      | 0.254   |
| History of coronary artery disease             | 389 (33.8)                   | 166 (32.4)                      | 0.573   |
| Diabetes                                       | 180 (19.9)                   | 68 (18.0)                       | 0.432   |
| Hypertension                                   | 323 (36.1)                   | 121 (31.9)                      | 0.150   |
| Hypercholesterolemia/statin use                | 212 (25.7)                   | 88 (25.1)                       | 0.842   |
| Cardiac arrhythmia                             | 230 (25.4)                   | 102 (24.3)                      | 0.684   |
| <b>Symptoms</b>                                |                              |                                 |         |
| Chest pain                                     | 1981 (93.6)                  | 894 (92.8)                      | 0.417   |
| Shortness of breath                            | 1094 (64.5)                  | 520 (64.3)                      | 0.911   |
| Chest pain duration <12 hours                  | 1403 (73.2)                  | 610 (69.6)                      | 0.052   |
| Pain intensity severe (NRS >7 in range 1-10)   | 337 (36.6)                   | 185 (43.0)                      | 0.024   |
| Pressing heavy pain*                           | 1023 (62.9)                  | 444 (61.6)                      | 0.538   |
| Stabbing chest pain*                           | 366 (22.5)                   | 177 (24.5)                      | 0.280   |
| Chest pain located retrosternal**              | 641 (40.9)                   | 294 (40.2)                      | 0.736   |
| Chest pain located left or right on thorax**   | 627 (40.0)                   | 294 (40.2)                      | 0.945   |
| Radiation of chest pain to any location        | 1077 (64.3)                  | 458 (60.1)                      | 0.047   |
| Radiation to the arm ***                       | 452 (42.2)                   | 179 (39.8)                      | 0.373   |

|                                                         |             |            |       |
|---------------------------------------------------------|-------------|------------|-------|
| Radiation to the shoulder blades ***                    | 326 (30.5)  | 136 (30.2) | 0.924 |
| Radiation to the jaws ***                               | 124 (11.6)  | 41 (9.1)   | 0.156 |
| Sweating                                                | 559 (40.9)  | 259 (42.0) | 0.638 |
| Nausea or vomiting                                      | 489 (49.5)  | 229 (47.1) | 0.381 |
| Pallor or ashen skin                                    | 322 (47.8)  | 136 (40.8) | 0.038 |
| (Near) fainting                                         | 143 (7.4)   | 72 (7.8)   | 0.678 |
| Palpitations                                            | 284 (80.7)  | 125 (83.9) | 0.396 |
| Patient recognizes symptoms from previous cardiac event | 250 (27.3)  | 102 (26.7) | 0.819 |
| <b>Urgency allocation</b>                               |             |            |       |
| High urgency (U1 or U2)                                 | 1496 (68.2) | 661 (65.3) | 0.100 |
| U1                                                      | 974 (44.5)  | 390 (38.6) |       |
| U2                                                      | 522 (23.8)  | 271 (26.8) |       |
| U3,U4,U5                                                | 696 (31.8)  | 351 (34.7) |       |

**Appendix - Table 6. Base model with age and sex for predicting the diagnosis ACS.**

| Predictors                                                  | Regression coefficients (standard error) |
|-------------------------------------------------------------|------------------------------------------|
| Intercept                                                   | - 14.671 (3.442)                         |
| Age                                                         | 0.289 (0.079)                            |
| Age'                                                        | - 0.379 (0.123)                          |
| Age''                                                       | 1.017 (0.386)                            |
| Female sex                                                  | 2.155 (5.385)                            |
| Age * Female sex                                            | - 0.084 (0.123)                          |
| Age' * Female sex                                           | 0.175 (0.190)                            |
| Age'' * Female sex                                          | - 0.532 (0.589)                          |
| Apparent c-statistic 0.72 (95% CI 0.70-0.75)                |                                          |
| Adjusted c-statistic 0.72 (95% CI 0.68-0.75)                |                                          |
| Calibration slope 0.977 (95% CI 0.617-1.338)                |                                          |
| Calibration 0.016 (95% CI -0.702-0.734)                     |                                          |
| R <sup>2</sup> 0.065                                        |                                          |
| Knots for cubic spline functions placed at 5, 35, 65 and 95 |                                          |

**Appendix - Table 7. Full model including all candidate predictors for predicting the diagnosis ACS**

| Predictors                                                  | Regression coefficients (standard error) |
|-------------------------------------------------------------|------------------------------------------|
| Intercept                                                   | -15.914 (3.55)                           |
| Age                                                         | 0.288 (0.081)                            |
| Age'                                                        | -0.388 (0.126)                           |
| Age''                                                       | 1.058 (0.396)                            |
| Female gender                                               | 2.459 (5.519)                            |
| Age * Female sex                                            | -0.094 (0.126)                           |
| Age' * Female sex                                           | 0.187 (0.195)                            |
| Age'' * Female sex                                          | -0.554 (0.606)                           |
| Chest pain                                                  | -0.064 (0.365)                           |
| Acute chest pain (< 12 hours)                               | 0.258 (0.200)                            |
| Shortness of breath                                         | -0.141 (0.200)                           |
| Sweating                                                    | 0.459 (0.183)                            |
| Retrosternal located pain                                   | 0.178 (0.177)                            |
| Radiation of chest pain                                     | 0.617 (0.180)                            |
| Pressing heavy feeling                                      | 0.619 (0.272)                            |
| Stabbing pain                                               | -0.200 (0.353)                           |
| History of cardiovascular disease*                          | -0.039 (0.247)                           |
| History of coronary artery disease                          | 0.108 (0.234)                            |
| Someone else calls instead of the patient                   | 0.197 (0.160)                            |
| Patient calls during the night (0am-9am)                    | 0.495 (0.152)                            |
| Apparent c-statistic 0.79 (95% CI 0.76-0.81)                |                                          |
| Adjusted c-statistic 0.77 (95% CI 0.74-0.80)                |                                          |
| Calibration slope 0.818 (95% CI 0.650-0.986)                |                                          |
| Calibration -0.238 (-0.621-0.145)                           |                                          |
| R <sup>2</sup> 0.107                                        |                                          |
| Knots for cubic spline functions placed at 5, 35, 65 and 95 |                                          |

**Appendix - Table 8. Diagnostic accuracy for a range of risk thresholds of the final model**

| Risk threshold            | Sensitivity (95% CI) | Specificity (95% CI) | Positive predictive value | Negative predictive value |
|---------------------------|----------------------|----------------------|---------------------------|---------------------------|
| <b>0.001</b>              | 0.98 (0.95-0.99)     | 0.21 (0.18-0.24)     | 0.14                      | 0.99                      |
| <b>0.010</b>              | 0.98 (0.95-0.99)     | 0.42 (0.40-0.45)     | 0.18                      | 0.99                      |
| <b>0.020</b>              | 0.97 (0.94-0.99)     | 0.50 (0.47-0.54)     | 0.20                      | 0.99                      |
| <b>0.050</b>              | 0.93 (0.87-0.96)     | 0.63 (0.59-0.67)     | 0.25                      | 0.99                      |
| <b>0.075</b>              | 0.88 (0.81-0.92)     | 0.72 (0.68-0.76)     | 0.29                      | 0.98                      |
| <b>0.100</b>              | 0.81 (0.7-0.87)      | 0.79 (0.76-0.82)     | 0.33                      | 0.97                      |
| <b>0.115 (prevalence)</b> | 0.76 (0.67-0.83)     | 0.82 (0.79-0.85)     | 0.36                      | 0.96                      |
| <b>0.150</b>              | 0.64 (0.56-0.73)     | 0.88 (0.85-0.90)     | 0.41                      | 0.95                      |
| <b>0.200</b>              | 0.46 (0.38-0.55)     | 0.93 (0.91-0.94)     | 0.46                      | 0.93                      |

Appendix – Figure 1. Calibration of full model with internal external validation

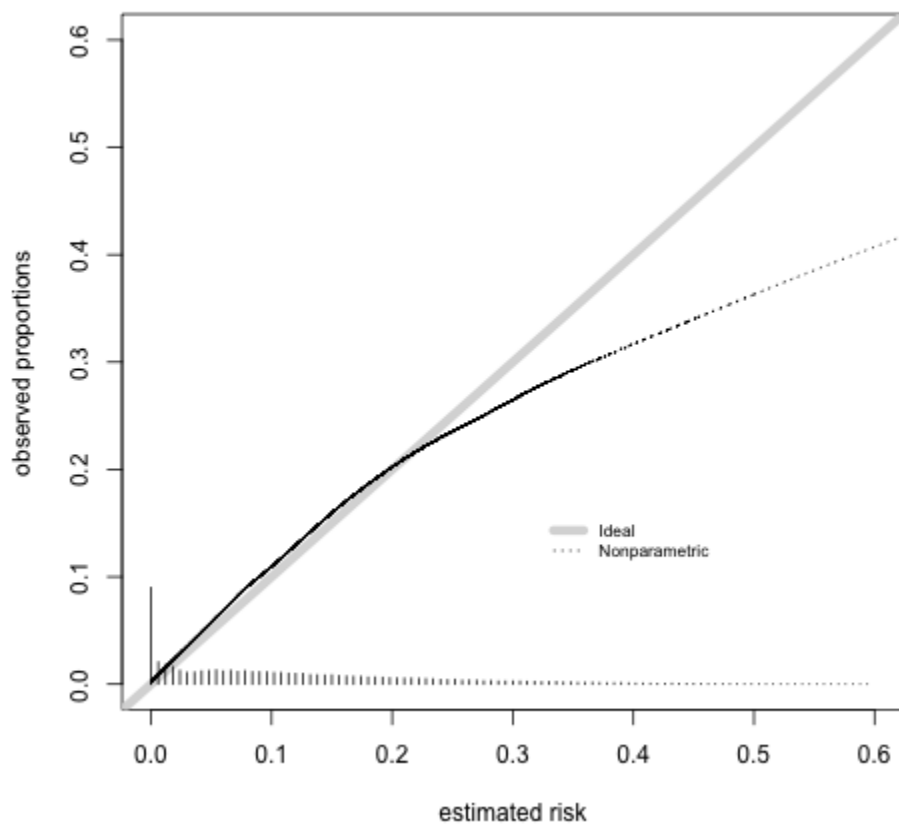

www only

Appendix – Figure 2. Decision curve analyses comparing the full and final models versus the currently used model and versus treat all patients.

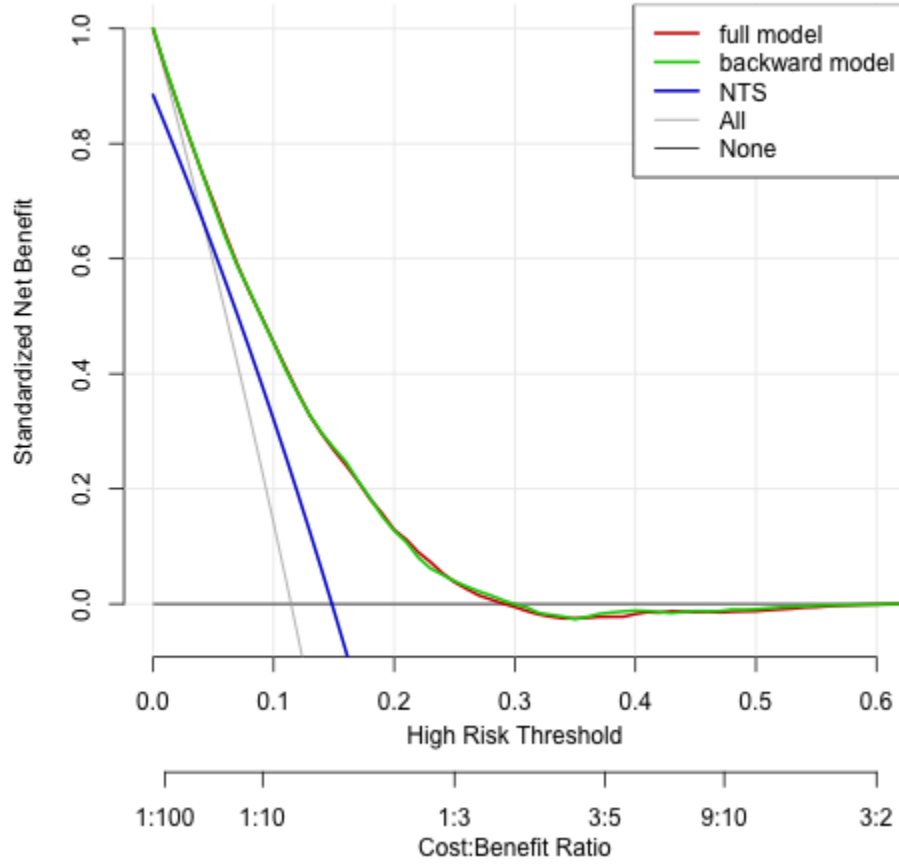

Appendix – Figure 3. Runway plot of diagnostic accuracy measures of the final model.

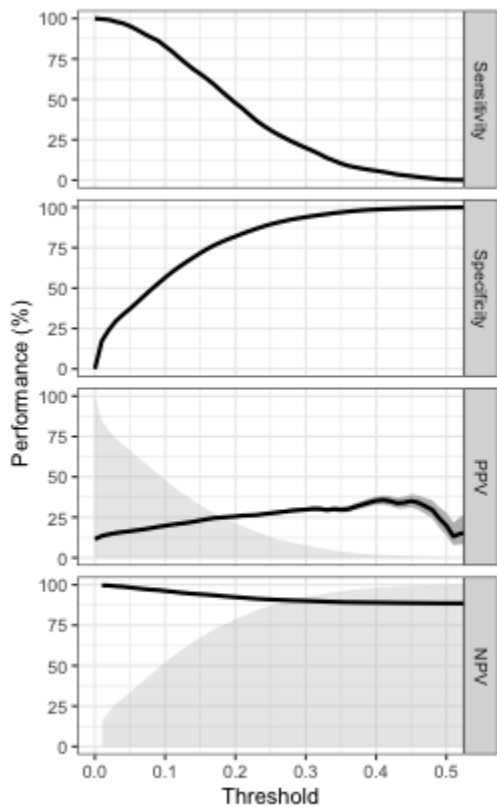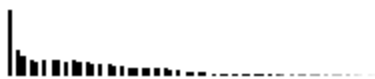

view only



## TRIPOD Checklist: Prediction Model Development and Validation

| Section/Topic                | Item | Checklist Item | Page                                                                                                                                                                                                  |           |
|------------------------------|------|----------------|-------------------------------------------------------------------------------------------------------------------------------------------------------------------------------------------------------|-----------|
| <b>Title and abstract</b>    |      |                |                                                                                                                                                                                                       |           |
| Title                        | 1    | D;V            | Identify the study as developing and/or validating a multivariable prediction model, the target population, and the outcome to be predicted.                                                          | 1         |
| Abstract                     | 2    | D;V            | Provide a summary of objectives, study design, setting, participants, sample size, predictors, outcome, statistical analysis, results, and conclusions.                                               | 2         |
| <b>Introduction</b>          |      |                |                                                                                                                                                                                                       |           |
| Background and objectives    | 3a   | D;V            | Explain the medical context (including whether diagnostic or prognostic) and rationale for developing or validating the multivariable prediction model, including references to existing models.      | 4,5       |
|                              | 3b   | D;V            | Specify the objectives, including whether the study describes the development or validation of the model or both.                                                                                     | 5         |
| <b>Methods</b>               |      |                |                                                                                                                                                                                                       |           |
| Source of data               | 4a   | D;V            | Describe the study design or source of data (e.g., randomized trial, cohort, or registry data), separately for the development and validation data sets, if applicable.                               | 5         |
|                              | 4b   | D;V            | Specify the key study dates, including start of accrual; end of accrual; and, if applicable, end of follow-up.                                                                                        | 5         |
| Participants                 | 5a   | D;V            | Specify key elements of the study setting (e.g., primary care, secondary care, general population) including number and location of centres.                                                          | 5         |
|                              | 5b   | D;V            | Describe eligibility criteria for participants.                                                                                                                                                       | 5,6       |
|                              | 5c   | D;V            | Give details of treatments received, if relevant.                                                                                                                                                     | n.a.      |
| Outcome                      | 6a   | D;V            | Clearly define the outcome that is predicted by the prediction model, including how and when assessed.                                                                                                | 6         |
|                              | 6b   | D;V            | Report any actions to blind assessment of the outcome to be predicted.                                                                                                                                | 6         |
| Predictors                   | 7a   | D;V            | Clearly define all predictors used in developing or validating the multivariable prediction model, including how and when they were measured.                                                         | 6         |
|                              | 7b   | D;V            | Report any actions to blind assessment of predictors for the outcome and other predictors.                                                                                                            | 6         |
| Sample size                  | 8    | D;V            | Explain how the study size was arrived at.                                                                                                                                                            | 6         |
| Missing data                 | 9    | D;V            | Describe how missing data were handled (e.g., complete-case analysis, single imputation, multiple imputation) with details of any imputation method.                                                  | 7         |
| Statistical analysis methods | 10a  | D              | Describe how predictors were handled in the analyses.                                                                                                                                                 | 7         |
|                              | 10b  | D              | Specify type of model, all model-building procedures (including any predictor selection), and method for internal validation.                                                                         | 7         |
|                              | 10c  | V              | For validation, describe how the predictions were calculated.                                                                                                                                         | 7         |
|                              | 10d  | D;V            | Specify all measures used to assess model performance and, if relevant, to compare multiple models.                                                                                                   | 7         |
|                              | 10e  | V              | Describe any model updating (e.g., recalibration) arising from the validation, if done.                                                                                                               | n.a.      |
| Risk groups                  | 11   | D;V            | Provide details on how risk groups were created, if done.                                                                                                                                             | n.a.      |
| Development vs. validation   | 12   | V              | For validation, identify any differences from the development data in setting, eligibility criteria, outcome, and predictors.                                                                         | 7, suppl  |
| <b>Results</b>               |      |                |                                                                                                                                                                                                       |           |
| Participants                 | 13a  | D;V            | Describe the flow of participants through the study, including the number of participants with and without the outcome and, if applicable, a summary of the follow-up time. A diagram may be helpful. | 5         |
|                              | 13b  | D;V            | Describe the characteristics of the participants (basic demographics, clinical features, available predictors), including the number of participants with missing data for predictors and outcome.    | 8,9,10    |
|                              | 13c  | V              | For validation, show a comparison with the development data of the distribution of important variables (demographics, predictors and outcome).                                                        | suppl     |
| Model development            | 14a  | D              | Specify the number of participants and outcome events in each analysis.                                                                                                                               | 8         |
|                              | 14b  | D              | If done, report the unadjusted association between each candidate predictor and outcome.                                                                                                              | 11,12     |
| Model specification          | 15a  | D              | Present the full prediction model to allow predictions for individuals (i.e., all regression coefficients, and model intercept or baseline survival at a given time point).                           | 12, suppl |
|                              | 15b  | D              | Explain how to use the prediction model.                                                                                                                                                              | 13        |
| Model performance            | 16   | D;V            | Report performance measures (with CIs) for the prediction model.                                                                                                                                      | 12, 13    |
| Model-updating               | 17   | V              | If done, report the results from any model updating (i.e., model specification, model performance).                                                                                                   | 12,13     |
| <b>Discussion</b>            |      |                |                                                                                                                                                                                                       |           |
| Limitations                  | 18   | D;V            | Discuss any limitations of the study (such as nonrepresentative sample, few events per predictor, missing data).                                                                                      | 14        |
| Interpretation               | 19a  | V              | For validation, discuss the results with reference to performance in the development data, and any other validation data.                                                                             | 14, 15    |
|                              | 19b  | D;V            | Give an overall interpretation of the results, considering objectives, limitations, results from similar studies, and other relevant evidence.                                                        | 15        |
| Implications                 | 20   | D;V            | Discuss the potential clinical use of the model and implications for future research.                                                                                                                 | 16        |
| <b>Other information</b>     |      |                |                                                                                                                                                                                                       |           |
| Supplementary information    | 21   | D;V            | Provide information about the availability of supplementary resources, such as study protocol, Web calculator, and data sets.                                                                         | 17        |
| Funding                      | 22   | D;V            | Give the source of funding and the role of the funders for the present study.                                                                                                                         | 17        |

\*Items relevant only to the development of a prediction model are denoted by D, items relating solely to a validation of a prediction model are denoted by V, and items relating to both are denoted D;V. We recommend using the TRIPOD Checklist in conjunction with the TRIPOD Explanation and Elaboration document.

# BMJ Open

## Development and validation of a prediction rule for patients suspected of acute coronary syndrome in primary care: a cross-sectional study

|                                 |                                                                                                                                                                                                                                                                                                                                                                                                                                                                                                                                                                                                                                                                                                                                                                                                                                                                                                           |
|---------------------------------|-----------------------------------------------------------------------------------------------------------------------------------------------------------------------------------------------------------------------------------------------------------------------------------------------------------------------------------------------------------------------------------------------------------------------------------------------------------------------------------------------------------------------------------------------------------------------------------------------------------------------------------------------------------------------------------------------------------------------------------------------------------------------------------------------------------------------------------------------------------------------------------------------------------|
| Journal:                        | <i>BMJ Open</i>                                                                                                                                                                                                                                                                                                                                                                                                                                                                                                                                                                                                                                                                                                                                                                                                                                                                                           |
| Manuscript ID                   | bmjopen-2022-064402.R1                                                                                                                                                                                                                                                                                                                                                                                                                                                                                                                                                                                                                                                                                                                                                                                                                                                                                    |
| Article Type:                   | Original research                                                                                                                                                                                                                                                                                                                                                                                                                                                                                                                                                                                                                                                                                                                                                                                                                                                                                         |
| Date Submitted by the Author:   | 02-Aug-2022                                                                                                                                                                                                                                                                                                                                                                                                                                                                                                                                                                                                                                                                                                                                                                                                                                                                                               |
| Complete List of Authors:       | Wouters, Loes; Julius Center for Health Sciences and Primary Care, General Practice<br>Zwart, D.L; Julius Center for Health Sciences and Primary Care, General Practice<br>Erkelens, Daphne; Julius Center for Health Sciences and Primary Care, General practice<br>Adriaansen, Elisabeth; Julius Center for Health Sciences and Primary Care, General Practice<br>den Ruijter, Hester; Utrecht University, Experimental Cardiology<br>De Groot, Esther; Utrecht University, Julius Center for health sciences and primary care<br>Damoiseaux, Roger; Julius Center for Health Sciences and Primary Care, General practice<br>Hoes, Arno; Julius Center for Health Sciences and Primary Care, General practice<br>van Smeden, Maarten; Julius Center for Health Sciences and Primary Care, Methodology department<br>Rutten, Frans; Julius Center for Health Sciences and Primary Care, General Practice |
| <b>Primary Subject Heading</b>: | General practice / Family practice                                                                                                                                                                                                                                                                                                                                                                                                                                                                                                                                                                                                                                                                                                                                                                                                                                                                        |
| Secondary Subject Heading:      | Emergency medicine, Cardiovascular medicine                                                                                                                                                                                                                                                                                                                                                                                                                                                                                                                                                                                                                                                                                                                                                                                                                                                               |
| Keywords:                       | PRIMARY CARE, Myocardial infarction < CARDIOLOGY, Telemedicine < BIOTECHNOLOGY & BIOINFORMATICS                                                                                                                                                                                                                                                                                                                                                                                                                                                                                                                                                                                                                                                                                                                                                                                                           |
|                                 |                                                                                                                                                                                                                                                                                                                                                                                                                                                                                                                                                                                                                                                                                                                                                                                                                                                                                                           |

SCHOLARONE™  
Manuscripts



I, the Submitting Author has the right to grant and does grant on behalf of all authors of the Work (as defined in the below author licence), an exclusive licence and/or a non-exclusive licence for contributions from authors who are: i) UK Crown employees; ii) where BMJ has agreed a CC-BY licence shall apply, and/or iii) in accordance with the terms applicable for US Federal Government officers or employees acting as part of their official duties; on a worldwide, perpetual, irrevocable, royalty-free basis to BMJ Publishing Group Ltd ("BMJ") its licensees and where the relevant Journal is co-owned by BMJ to the co-owners of the Journal, to publish the Work in this journal and any other BMJ products and to exploit all rights, as set out in our [licence](#).

The Submitting Author accepts and understands that any supply made under these terms is made by BMJ to the Submitting Author unless you are acting as an employee on behalf of your employer or a postgraduate student of an affiliated institution which is paying any applicable article publishing charge ("APC") for Open Access articles. Where the Submitting Author wishes to make the Work available on an Open Access basis (and intends to pay the relevant APC), the terms of reuse of such Open Access shall be governed by a Creative Commons licence – details of these licences and which [Creative Commons](#) licence will apply to this Work are set out in our licence referred to above.

Other than as permitted in any relevant BMJ Author's Self Archiving Policies, I confirm this Work has not been accepted for publication elsewhere, is not being considered for publication elsewhere and does not duplicate material already published. I confirm all authors consent to publication of this Work and authorise the granting of this licence.

1  
2  
3 **Development and validation of a prediction rule for patients suspected of acute coronary syndrome in**  
4 **primary care: a cross-sectional study**  
5  
6  
7

8 **Wouters LTCM<sup>1</sup>, Zwart DLM<sup>1</sup>, Erkelens DCA<sup>1</sup>, Adriaansen EJM<sup>1</sup>, Den Ruijter HM<sup>2</sup>, de Groot E<sup>1</sup>,**  
9 **Damoiseaux RAMJ<sup>1</sup>, Hoes AW<sup>1,3</sup>, van Smeden M<sup>3</sup>, Rutten FH<sup>1</sup>**  
10  
11  
12

- 13 1. Dept. General Practice, Julius Centre for Health Sciences and Primary Care, University Medical  
14 Centre Utrecht, Utrecht University, Utrecht, the Netherlands  
15  
16 2. Laboratory of Exp. Cardiology, University Medical Centre Utrecht, Utrecht University, Utrecht, the  
17 Netherlands  
18  
19 3. Dept. Epidemiology, Julius Centre for Health Sciences and Primary Care, University Medical Centre,  
20 Utrecht University, Utrecht, the Netherlands  
21  
22  
23  
24  
25  
26

27 **Corresponding author:** L.T. Wouters, MD, PhD

28 Dept. General Practice, Julius Centre for Health Sciences and Primary Care, University Medical Centre  
29 Utrecht, Utrecht University, STR 6.131, PO Box 85500, 3508 GA Utrecht, The Netherlands

30  
31 Phone number: +31 (0)88 75 51470

32  
33 Email: [L.T.C.Wouters-2@umcutrecht.nl](mailto:L.T.C.Wouters-2@umcutrecht.nl)  
34  
35  
36

37 **Word count: 4018**

38 **Abstract count: 249**  
39  
40  
41  
42  
43  
44  
45  
46  
47  
48  
49  
50  
51  
52  
53  
54  
55  
56  
57  
58  
59  
60

**Abstract**

**Objective** To develop and validate a symptom-based prediction rule for early recognition of acute coronary syndrome (ACS) in patients with acute chest discomfort who call out-of-hours services for primary care (OHS-PC).

**Design** Cross-sectional study. A diagnostic prediction rule was developed with multivariable regression analyses. All models were validated with internal-external cross validation within seven OHS-PC locations. Both age and sex were analysed as statistical interaction terms, applying for age non-linear effects.

**Setting** Seven OHS-PC in the Netherlands.

**Participants** 2,192 patients who called OHS-PC for acute chest discomfort (pain, pressure, tightness, or discomfort) between 2014 and 2017. Backed up recordings of telephone triage conversations were analysed.

**Primary and secondary outcomes measures** Diagnosis of ACS retrieved from the patient's medical records in general practice, including hospital specialists discharge letters. Performance of the prediction rules was calculated with the c-statistic and the final model was chosen based on net benefit analyses.

**Results** Among the 2,192 patients who called the OHS-PC with acute chest discomfort, 8.3% females and 15.3% males had an ACS. The final diagnostic model included seven predictors (sex, age, acute onset of chest pain lasting less than 12 hours, a pressing/heavy character of the pain, radiation of the pain, sweating, and calling at night). It had an adjusted c-statistic of 0.77 (95% CI 0.74-0.79) with good calibration.

**Conclusion** The final prediction model for ACS has good discrimination and calibration, and shows promise for replacing the existing telephone triage rules for patients with acute chest discomfort in general practice and OHS-PC.

**Trial registration** NTR7331

**Key words:** prediction rules, acute coronary syndrome, sex, symptoms, general practice, out-of-hours primary care

### Strengths and limitations of this study

- We could analyse the original and very first telephone conversation of patients with acute chest discomfort.
- The developed prediction model is well generalizable to other OHS-PCs in the Netherlands, but also to similar OHS-PC settings in other countries or even emergency medical service settings.
- A limitation is that fully external validation of the model in another OHS-PC was impossible because no other cohort similar to ours was available.
- Another limitation is that the effects of the predictors were assumed to be similar for males and females while this is not exactly the case, but by incorporating a differential non-linear effect of age and interaction with sex in the analyses this effect is minimized.

## Introduction

Chest discomfort is among the top five reasons for telephone contact in out-of-hours services for primary care (OHS-PC) and concerns 5% of all cases at the emergency department (ED) in the USA.<sup>1</sup> In the Netherlands, around 80% of patients with chest discomfort first call the general practitioner (GP) or OHS-PC, while 20% directly calls the emergency medical service (EMS, or ambulance dispatch centre) or are self-referrals to the ED.<sup>2</sup> Adequate triage and early diagnosis in these patients is vital, because in case of an underlying acute coronary syndrome (ACS) early effective therapeutic interventions ('time is muscle') improve the patient's outcome and prognosis.<sup>3</sup> For the diagnosis of ACS, a 12-lead electrocardiogram (ECG) and troponin testing is needed.<sup>3</sup> However, before the patient is referred to an ED where these diagnostic tests can be done, patient selection is necessary based on symptom presentation retrieved by telephone triage.<sup>4,5</sup> Symptom-based differentiation of ACS from other causes of chest discomfort is notoriously difficult.<sup>6</sup> Symptom-based prediction rules for diagnosing ACS in general practice and other prehospital settings are -although highly needed- scarce.<sup>7-9</sup> The efficiency and safety of telephone triage in OHS-PC was poor in a population with a prior chance of ACS of 8.3% in females and 15.3% in males; almost 50% of the males and females with chest discomfort received a high priority ambulance, while 11% diagnosed with an ACS did not received a high urgency (i.e., was seen within one hour).<sup>10</sup>

Most prediction rules for diagnosing ACS were developed in the ED setting, and include results from ECG and troponin testing.<sup>11</sup> Such prediction rules cannot be straightforward implemented for telephone triage in general practice because (i) in the latter setting these diagnostic tests are not available, (ii) the prior chance of ACS is rather low, and (iii) on average disease severity is less than in those seen in the ED.<sup>12,13</sup> The prevalence of ACS among patients with chest discomfort who call OHS-PC or EMS is about 10-15%, and among those seen at the ED between 10 to 30%.<sup>10,11,13,14</sup> Only one prediction rule was developed in primary care for diagnosing ACS; the modified Grijseels prediction rule, which had moderate discriminative ability (c-statistic of 0.66) after external validation.<sup>7,8</sup> Five other primary care prediction rules were developed to predict CAD; e.g. the Marburg Heart Score (MHS) and INTERCHEST prediction rule (International Working Group on Chest Pain in Primary Care).<sup>9</sup> In these studies both patients with acute and non-acute chest discomfort were included and the prevalence of stable CAD showed to be 10.9% to 12.6%, while that of ACS was only 1.5% to 2.5%.<sup>9</sup> Thus, these prediction rules have limited applicability for specifically diagnosing ACS.

1  
2  
3 In most OHS-PC and about half of the EMS in the Netherlands, triage nurses use the semi-automatic  
4 'Netherlands Triage Standard' (NTS) as a decision support tool to classify the urgency of the patient's  
5 condition. Triage nurses have to choose one out of 56 'main complaints' and based on answers linked to  
6 the triage criteria, the NTS automatically proposes one out of six levels of urgency, that is, a certain time  
7 frame in which patients should be seen (U0-U5, appendix- table 1). The NTS is a modified and shortened  
8 version of the Manchester Triage Standard which was developed in the ED setting.<sup>15</sup> Although the NTS  
9 was explicitly developed for telephone triage, it has not yet been validated against clinical outcomes  
10 even though it is already implemented on large scale. Recent research showed that the NTS had a poor  
11 sensitivity of 0.73 (95% CI 0.68-0.78) for telephone triage of patients with acute chest discomfort. The  
12 NTS recommended a low urgency (U3, U4 or U5) to 27% of patients who eventually showed to have an  
13 ACS or other life threatening event (LTE).<sup>10</sup> The NTS' specificity was also poor with 0.43 (95% CI 0.40-  
14 0.45); the NTS recommended a high urgency to 57% of the patients who eventually showed not to have  
15 an ACS or LTE. Given this poor safety and efficiency of the NTS, there is an urgent need for a better  
16 prediction model for patients with acute chest discomfort calling OHS-PC. In addition, there is a need for  
17 exploring sex-specificity of such prediction rule as there is an ongoing debate on whether females differ  
18 from males in reporting symptoms of ACS.<sup>16 17</sup>

19  
20  
21  
22  
23  
24  
25  
26  
27  
28  
29  
30  
31  
32 The aim of this study was to develop, and internal-external cross validate a symptom-based prediction  
33 rule for diagnosing ACS which is considerate to sex categories in male and female patients who call the  
34 OHS-PC for acute chest discomfort.

### 35 36 37 38 **Methods**

39  
40 We performed a cross-sectional study among 2,192 patients who called one out of seven participating  
41 OHS-PC in the Netherlands because of acute chest discomfort (pain, pressure, tightness, or discomfort)  
42 during the period 2014 to 2017.<sup>18</sup> These OHS-PC serve a total population of 1.5 million people and cover  
43 around 300,000 calls a year. We first selected calls based on of the International Code for Primary Care  
44 (ICPC; a WHO world-wide code system for primary care) with ICPC-codes K01, K02, K03, K24, K74, K75,  
45 K76, K77, K93, L04, P74, R02, R98 and calls with keywords thoracic pain, chest pain, myocardial  
46 infarction, heart attack and their common abbreviations (Figure 1). We included a broad variety of  
47 symptoms to capture the entire domain of patients that could be suspected of ACS. We listed all  
48 available calls of these patients and assigned random numbers with the Random Number Generator  
49 (RAND) function in Microsoft Excel to retrieve a random sample. Calls were excluded before re-listening



1  
2  
3 when the patients' age was below 18 years or when the patient did not live in the surrounding area of  
4 the OHS-PC (in which case we could not retrieve the final diagnosis from the patient's own general  
5 practitioner). Calls were excluded during re-listening when it did not concern a triage call (e.g. inter-  
6 collegial consultation) or when the recording was of poor quality (Figure 1).  
7  
8  
9

### 10 11 *Candidate predictors*

12 Research team members (LW, DE) and medical students listened to the call recordings, blinded for the  
13 outcome, to collect data about symptoms, medical history and urgency allocation. Patient (age, sex) and  
14 call characteristics (call time, call duration) were collected from the OHS-PC electronic medical files of  
15 the patients. As candidate predictors we included age and sex, the NTS triage criteria (see appendix-  
16 table 2), the ACS predictors from the modified Grijseels prediction model (male sex, radiation, nausea,  
17 sweating and history of CAD), the 'CAD predictors' from MHS and INTERCHEST prediction models (age,  
18 pain feels like pressure, CAD history or CV risk factors, patient assumes cardiac origin of pain), and -  
19 based on a recent own study in OHS-PC- the predictor 'calling at night between 0am and 9am'.<sup>7-9 19</sup>  
20  
21  
22  
23  
24  
25  
26  
27

### 28 *Outcome*

29 The primary outcome was the diagnosis ACS. The final diagnoses were retrieved from the patient's GP,  
30 and based on the GP's electronic medical files which include ED and cardiologist discharge letters and  
31 notes from the OHS-PC contact. The diagnosis ACS was nearly always made by a cardiologist (96.0%) and  
32 included information on levels of (high-sensitivity) troponin and electrocardiographic results. We used  
33 medical information up to 30-days following the contact with the OHS-PC to allow us to include  
34 diagnoses of ACS that were initially missed because the patient was not referred to the cardiologist the  
35 same day of the OHS-PC contact. However, in none of the patients in the study we had evidence of a  
36 missed diagnosis of ACS.  
37  
38  
39  
40  
41  
42  
43  
44

### 45 *Sample size calculation*

46 We relied on the minimal sample size criteria for prediction model development proposed by Riley et al,  
47 using the 'pmsampsize' package in R.<sup>20</sup> Based on an ACS prevalence of overall 11% and an Cox-Snell R-  
48 squared of 0.075 (a conservative value based on a model with age and sex) and a total number of 2,192  
49 observations we were allowed to assess 19 candidate predictors.<sup>21</sup> Based on sample size calculations we  
50 concluded that development of separate models for males and females would require a significantly  
51 larger sample, therefore we analysed sex as a statistical interaction term.<sup>20</sup>  
52  
53  
54  
55  
56  
57  
58  
59  
60

### *Statistical analyses*

We developed three diagnostic models using multivariable logistic regression analysis. First, we developed a base model with only age and sex as predictors, where age was modelled using a restricted cubic spline function (4 knots) and an interaction with sex. This resulted in a base model with 7 predictor parameters (excluding the intercept). Second, we fitted a full model with an additional 12 pre-selected binary predictors (having chest pain, acute chest pain shorter than 12 hours, shortness of breath, sweating, retrosternal located chest pain, radiation, pressing heavy pain, stabbing pain, history of CVD, history of CAD, someone else calling, calling at night). Thirdly, we applied backward elimination, with a cut-off p-value  $< 0.20$  for including predictors (a higher cut-off value to lower the chances of overfitting).

21

We applied internal-external cross validation (IECV) for model validation using the seven different OHS-PC locations (Appendix-Table 3 for patient characteristics of different OHS-PC locations).<sup>22</sup> We evaluated the IECV performance in terms of the area under the ROC curve (c-statistic), the calibration slope and calibration in the large. The IECV estimates of performance were combined by using random-effect model (DerSimonian-Laird estimator). Based on the IECV we also constructed flexible calibration curves and decision curves. In the decision curve analyses we compared the final model with the currently used NTS triage model in OHS-PC in the Netherlands.<sup>23</sup> Finally, we created an illustrative table of diagnostic test accuracy for various model-based risk thresholds of the final model, following the example in Wynants et al.<sup>23</sup> IECV estimates for risk threshold specific sensitivity and specificity, and we applied a bivariate model commonly used for diagnostic test accuracy meta-analysis.<sup>24</sup>

### *Missing data*

For missing data we carried out multiple imputation using the Multivariate Imputation via Chained Equation (MICE) package in R, with 30 imputation rounds and 30 iterations.<sup>25</sup> We pooled the results following Rubin's rules.<sup>26</sup> Predictors with over 50% missing were excluded from consideration in the models (Appendix-table 4 for details about the missing data). Characteristics were compared between patients with and without information on the medical outcome - because some GPs refused diagnosis retrieval from their files - to allow for assessment of differences in characteristics between these patient groups (Appendix-table 5). There were no clinically meaningful differences in symptoms and patient or call characteristics between the 2,192 patients with information on the outcome, and the 1,012 patients

about whom knowledge of the medical outcome related to the OHS-PC contact because of acute chest discomfort was missing.

All analyses were done in R version 4.0.3. (2020-10-10) with the Regression Modelling Strategies ('rms') package in R.<sup>27</sup> We reported our study in accordance to the Transparent Reporting of a multivariable prediction rules for Individual Prognosis Or Diagnosis (TRIPOD) criteria (Supplementary file).<sup>28</sup>

### *Patient and Public Involvement*

No patients were involved in defining the research question or the outcome measures. Neither they were involved in developing plans for design. However, they participated in the discussion on implications and the implementation strategy. In addition, they were asked to advise on interpretation and writing up of the results. Results will be shared and discussed in more detail with representatives of the Dutch national patient community of cardiovascular diseases ('Harteraad').

### **Results**

Among the 2,192 callers with acute chest discomfort (mean age 59.1 (SD 19.5) years and 55.3% females) 251 (11.5%) had a final diagnosis of ACS; 101 (8.3%) females and 150 (15.3%) males (Table 1). Patients with ACS were older than those without (mean age 69.7 (SD 13.4) vs. 57.7 (SD 19.8) years) and females with ACS were on average older than men with ACS (73.8 (SD 13.5) years vs. 67.0 (SD 12.6) years).

**Table 1. Characteristics of 2,192 patients who called OHS PC with acute chest discomfort between 2014-2017, divided between females and males with and without ACS.**

| Characteristics                               | 1,213 females (55.3%) |                        | 979 males (44.7%) |                       |
|-----------------------------------------------|-----------------------|------------------------|-------------------|-----------------------|
|                                               | ACS n=101 (8.3%)      | No ACS n=1,112 (91.7%) | ACS n=150 (15.3%) | No ACS n= 829 (84.7%) |
| <b>Patient characteristics</b>                |                       |                        |                   |                       |
| Mean age in years (SD) (n=2,192)              | 73.8 (13.5)           | 58.0 (20.2)            | 67.0 (12.6)       | 57.2 (19.2)           |
| <b>Call characteristics</b>                   |                       |                        |                   |                       |
| Median call duration in min (IQR) (n=2,192)   | 5:27 (3:57-8:24)      | 6:59 (5:06-9:47)       | 6:04 (4:03-8:17)  | 6:56 (5:10-9:23)      |
| Mean introduction time in min (IQR) (n=2,192) | 0:13 (0:09-0:18)      | 0:17 (0:11-0:26)       | 0:14 (0:09-0:21)  | 0:17 (0:11-0:25)      |
| Call during the night (0am-9am) (n=2,192)     | 34 (33.7)             | 304 (27.3)             | 62 (41.3)         | 188 (22.7)            |

1  
2  
3  
4  
5  
6  
7  
8  
9  
10  
11  
12  
13  
14  
15  
16  
17  
18  
19  
20  
21  
22  
23  
24  
25  
26  
27  
28  
29  
30  
31  
32  
33  
34  
35  
36  
37  
38  
39  
40  
41  
42  
43  
44  
45  
46  
47  
48  
49  
50  
51  
52  
53  
54  
55  
56  
57  
58  
59  
60

|                                                                 |            |             |            |            |
|-----------------------------------------------------------------|------------|-------------|------------|------------|
| Triage nurse consulted the GP (n=2,192)                         | 43 (42.6)  | 580 (52.2)  | 75 (50.0)  | 449 (54.2) |
| Someone else called on behalf of patient (n=2,192)              | 69 (68.3)  | 515 (46.3)  | 98 (65.3)  | 432 (52.1) |
| The person who calls expressed concerns (n=988)                 | 42 (95.5)  | 507 (90.5)  | 61 (96.8)  | 378 (87.1) |
| <b>Medical history and risk factors</b>                         |            |             |            |            |
| Cardiovascular disease or CV risk factors (n=1,844)             | 70 (81.4)  | 552 (61.1)  | 106 (78.5) | 464 (64.4) |
| History of coronary artery disease (n=1,151)                    | 23 (47.9)  | 131 (24.2)  | 54 (56.3)  | 181 (38.8) |
| Diabetes (n=893)                                                | 14 (42.4)  | 66 (14.3)   | 22 (39.3)  | 78 (22.0)  |
| Hypertension (n=894)                                            | 26 (72.2)  | 162 (34.0)  | 22 (51.2)  | 113 (33.3) |
| Hypercholesterolemia/statin use (n=826)                         | 10 (40.0)  | 96 (22.6)   | 27 (50.0)  | 79 (24.5)  |
| Cardiac arrhythmia (n=905)                                      | 4 (14.8)   | 125 (26.2)  | 12 (25.0)  | 89 (25.2)  |
| <b>Symptoms</b>                                                 |            |             |            |            |
| Chest pain (n=2,116)                                            | 95 (96.9)  | 1007 (94.1) | 139 (93.3) | 758 (94.9) |
| Shortness of breath (n=1,696)                                   | 57 (71.3)  | 559 (65.4)  | 63 (61.2)  | 415 (63.1) |
| Chest pain duration <12 hours (n=1,910)                         | 74 (86.0)  | 703 (72.3)  | 113 (82.5) | 510 (71.3) |
| Severe pain (NRS >7, range 1-10) (n=917)                        | 19 (61.3)  | 184 (39.6)  | 18 (25.4)  | 116 (33.0) |
| Pressing/heavy chest pain* (n=1,625)                            | 58 (81.7)  | 525 (62.5)  | 95 (81.2)  | 345 (57.7) |
| Stabbing chest pain* (n=1,625)                                  | 8 (11.3)   | 190 (22.6)  | 9 (7.7)    | 159 (26.6) |
| Retrosternal chest pain ** (n=1,565)                            | 36 (54.5)  | 326 (40.0)  | 52 (53.1)  | 227 (38.7) |
| Chest pain left or right of thorax** (n=1,566)                  | 19 (28.8)  | 318 (39.0)  | 28 (28.6)  | 262 (44.6) |
| Radiation of chest pain to any location (n=1,678)               | 74 (86.0)  | 575 (67.8)  | 83 (65.4)  | 347 (56.2) |
| Radiation to the arm *** (n=1,677)                              | 37 (43.0)  | 218 (25.7)  | 54 (42.5)  | 143 (23.2) |
| Radiation to the shoulder blades *** (n=1,678)                  | 14 (16.3)  | 190 (22.4)  | 19 (15.0)  | 103 (16.7) |
| Radiation to the jaws *** (n=1,678)                             | 10 (11.6)  | 77 (9.1)    | 4 (3.1)    | 33 (5.3)   |
| Sweating (n=1,366)                                              | 36 (52.9)  | 279 (42.0)  | 54 (51.9)  | 190 (35.8) |
| Nausea or vomiting (n=987)                                      | 24 (52.2)  | 295 (56.6)  | 31 (43.1)  | 139 (39.9) |
| Pallor or ashen skin (n=673)                                    | 22 (59.5)  | 139 (44.3)  | 36 (64.3)  | 125 (46.8) |
| (Near) fainting (n=1,951)                                       | 8 (9.5)    | 76 (7.7)    | 9 (6.7)    | 50 (6.7)   |
| Palpitations (n=162)                                            | 10 (100.0) | 183 (84.7)  | 8 (50.0)   | 83 (75.5)  |
| Patient recognizes symptoms from previous cardiac event (n=915) | 17 (35.4)  | 100 (22.0)  | 30 (46.9)  | 103 (29.5) |
| <b>Urgency allocation</b>                                       |            |             |            |            |

1  
2  
3  
4  
5  
6  
7  
8  
9

|                                   |           |            |            |            |
|-----------------------------------|-----------|------------|------------|------------|
| High urgency (U1 or U2) (n=2,192) | 89 (88.1) | 740 (66.5) | 133 (88.7) | 534 (64.4) |
| U1                                | 75 (74.3) | 443 (39.8) | 106 (70.7) | 350 (42.2) |
| U2                                | 14 (13.9) | 297 (26.7) | 27 (18.0)  | 184 (22.2) |
| Low urgency (U3 or U4 or U5)      | 12 (11.9) | 372 (33.5) | 17 (11.3)  | 295 (35.6) |

10 \*Pain described by patient. Pressing heavy pain: pressing, heavy or tightening pain vs. other types of pain (stabbing, burning, cramping,  
 11 tearing) Stabbing pain: stabbing vs. other types of pain (pressing, heavy, tightening, burning, cramping)  
 12  
 13 \*\* Retrosternal location vs. other pain locations. Left or right side of the thorax vs. other pain locations  
 14 \*\*\* Radiation location vs. no radiation and radiation other pain  
 15

16  
17  
18  
19  
20  
21  
22  
23  
24  
25

Over two thirds of all callers (68.3%) received a high urgency allocation (seen within one hour; U1 or U2) and among the 251 patients who showed to have an ACS, 88.4% received a high urgency allocation. Calls of patients who had an ACS were shorter than calls in those without ACS (median call duration 6:34 (SD 3:38) vs. 7:42 (SD 3:48) minutes).

26  
27  
28  
29  
30  
31  
32  
33  
34  
35  
36  
37  
38  
39  
40  
41  
42  
43  
44

#### *Medical history and symptoms*

Females and males with ACS had more often a history with CVD or CV risk factors than those without (females with ACS 81.4% vs. females without ACS 61.1%, males with ACS 78.5% vs. males without ACS 64.4%) (Table 1). The majority of both females and males had chest pain (94.5%) and this was similar among those with and without ACS. Overall, presented symptoms among males and females calling the OHS-PC for chest discomfort were quite similar. Symptoms associated with ACS in both sexes were pressing/heavy chest pain (females with ACS 81.7% vs. females without ACS 62.5%, males 81.2% vs. 57.7% respectively), retrosternal located chest pain (females 54.5% vs. 40.0%, males 53.1% vs. 38.7%), radiation of pain (females 86.0% vs 67.8%, males 65.4% vs 56.2%), and sweating (females 52.9% vs. 42.0%, males 51.9% vs. 35.8%).

45  
46  
47  
48  
49  
50  
51  
52  
53  
54  
55  
56

#### *Diagnoses*

In total 251 patients were diagnosed with ACS and 65 with other LTEs, and of clinical relevance is that both critical events occurred significantly more in males than females (15.3% vs. 8.3%,  $p < 0.001$  for ACS, and 3.8% vs. 2.3%,  $p = 0.04$  for other LTEs, respectively). Of the 101 females with ACS, 22.8% had a ST-segment elevation myocardial infarction (STEMI), 46.5% a non ST-segment elevation myocardial infarction (NSTEMI), 19.8% unstable angina pectoris (UAP), and 10.9% non-classified ACS. In 150 males with ACS, 33.3% had a STEMI, 36.7% a NSTEMI, 26.0% UAP, and 4.0% non-classified ACS (Table 2). **Table 2. Diagnoses of 2,192 males and females who contacted the OHS-PC for acute chest discomfort between 2014-2017, by sex.**

57  
58  
59  
60

| Diagnosis, n (%)                                                                                                                                                                                                                                                                                                                                                                                                                                                                                                                                                                                                                                                                                                                                                                                                                                                                                                                                                                                                                                                                                                                                              | Females<br>n= 1213 | Males<br>n= 979 | p-value |
|---------------------------------------------------------------------------------------------------------------------------------------------------------------------------------------------------------------------------------------------------------------------------------------------------------------------------------------------------------------------------------------------------------------------------------------------------------------------------------------------------------------------------------------------------------------------------------------------------------------------------------------------------------------------------------------------------------------------------------------------------------------------------------------------------------------------------------------------------------------------------------------------------------------------------------------------------------------------------------------------------------------------------------------------------------------------------------------------------------------------------------------------------------------|--------------------|-----------------|---------|
| <b>Acute coronary syndrome*</b>                                                                                                                                                                                                                                                                                                                                                                                                                                                                                                                                                                                                                                                                                                                                                                                                                                                                                                                                                                                                                                                                                                                               | 101 (8.3)          | 150 (15.3)      | <0.001  |
| <b>STEMI</b>                                                                                                                                                                                                                                                                                                                                                                                                                                                                                                                                                                                                                                                                                                                                                                                                                                                                                                                                                                                                                                                                                                                                                  | 23 (22.8)          | 50 (33.3)       | 0.071   |
| <b>NSTEMI</b>                                                                                                                                                                                                                                                                                                                                                                                                                                                                                                                                                                                                                                                                                                                                                                                                                                                                                                                                                                                                                                                                                                                                                 | 47 (46.5)          | 55 (36.7)       | 0.119   |
| <b>UAP</b>                                                                                                                                                                                                                                                                                                                                                                                                                                                                                                                                                                                                                                                                                                                                                                                                                                                                                                                                                                                                                                                                                                                                                    | 20 (19.8)          | 39 (26.0)       | 0.256   |
| <b>Non-classified ACS</b>                                                                                                                                                                                                                                                                                                                                                                                                                                                                                                                                                                                                                                                                                                                                                                                                                                                                                                                                                                                                                                                                                                                                     | 11 (10.9)          | 6 (4.0)         | 0.033   |
| <b>Life threatening events (LTEs)</b>                                                                                                                                                                                                                                                                                                                                                                                                                                                                                                                                                                                                                                                                                                                                                                                                                                                                                                                                                                                                                                                                                                                         | 28 (2.3)           | 37 (3.8)        | 0.043   |
| <b>Pulmonary embolism</b>                                                                                                                                                                                                                                                                                                                                                                                                                                                                                                                                                                                                                                                                                                                                                                                                                                                                                                                                                                                                                                                                                                                                     | 8 (28.6)           | 10 (27.0)       | 0.890   |
| <b>Acute abdominal aneurysm</b>                                                                                                                                                                                                                                                                                                                                                                                                                                                                                                                                                                                                                                                                                                                                                                                                                                                                                                                                                                                                                                                                                                                               | 2 (7.1)            | 3 (8.1)         | 0.885   |
| <b>Thoracic aortic dissection</b>                                                                                                                                                                                                                                                                                                                                                                                                                                                                                                                                                                                                                                                                                                                                                                                                                                                                                                                                                                                                                                                                                                                             | 1 (3.6)            | 4 (10.8)        | 0.278   |
| <b>Other**</b>                                                                                                                                                                                                                                                                                                                                                                                                                                                                                                                                                                                                                                                                                                                                                                                                                                                                                                                                                                                                                                                                                                                                                | 17 (60.7)          | 20 (54.1)       | 0.591   |
| <b>Non-urgent cardiovascular diseases***</b>                                                                                                                                                                                                                                                                                                                                                                                                                                                                                                                                                                                                                                                                                                                                                                                                                                                                                                                                                                                                                                                                                                                  | 223 (18.4)         | 191 (19.5)      | 0.069   |
| <b>Musculoskeletal pain</b>                                                                                                                                                                                                                                                                                                                                                                                                                                                                                                                                                                                                                                                                                                                                                                                                                                                                                                                                                                                                                                                                                                                                   | 245 (20.2)         | 148 (15.2)      | 0.039   |
| <b>Non-cardiac chest pain, not further specified ****</b>                                                                                                                                                                                                                                                                                                                                                                                                                                                                                                                                                                                                                                                                                                                                                                                                                                                                                                                                                                                                                                                                                                     | 191 (15.7)         | 179 (18.3)      | 0.012   |
| <b>Psychogenic disorders</b>                                                                                                                                                                                                                                                                                                                                                                                                                                                                                                                                                                                                                                                                                                                                                                                                                                                                                                                                                                                                                                                                                                                                  | 165 (13.6)         | 85 (8.7)        | 0.005   |
| <b>Gastrointestinal tract disorders</b>                                                                                                                                                                                                                                                                                                                                                                                                                                                                                                                                                                                                                                                                                                                                                                                                                                                                                                                                                                                                                                                                                                                       | 89 (7.3)           | 68 (6.9)        | 0.776   |
| <b>Respiratory tract disorders</b>                                                                                                                                                                                                                                                                                                                                                                                                                                                                                                                                                                                                                                                                                                                                                                                                                                                                                                                                                                                                                                                                                                                            | 61 (5.0)           | 56 (5.7)        | 0.203   |
| <b>Other non-urgent diagnoses*****</b>                                                                                                                                                                                                                                                                                                                                                                                                                                                                                                                                                                                                                                                                                                                                                                                                                                                                                                                                                                                                                                                                                                                        | 110 (9.1)          | 65 (6.6)        | 0.152   |
| <p>* Almost all patients (96.0%) were diagnosed by a cardiologist. Ten (4.0%) ACS patients were not diagnosed by a cardiologist; four died before arrival of the ambulance, one patient died after resuscitation at the ED (all these five were classified as acute cardiac death due to ACS), and in five patients the ACS diagnosis was solely based on the GP's interpretation in patients who were not referred to the hospital after shared decision because of a short life expectancy due to cancer in a palliative stage.</p> <p>** Stroke, severe COPD exacerbation, acute severe heart failure, sepsis, hypokalaemia, diabetic ketoacidosis, epileptic insult, bleeding from oesophageal varices, ovarian torsion, ventricular fibrillation.</p> <p>*** Stable angina pectoris (including atypical chest pain), stable heart failure, arrhythmias, hypertension</p> <p>**** Cardiac pathology unlikely after cardiologist's or GP's diagnostic work-up, but without differential diagnosis</p> <p>***** Amongst others: anaemia, carcinoma, vasovagal collapse, side effects medication, dermatological diseases (e.g. herpes Zoster infection)</p> |                    |                 |         |

Twenty-eight (2.3%) females and 37 males (3.8%) had another life-threatening event than ACS (e.g. pulmonary embolism, thoracic aortic dissection, acute abdominal aneurysm). All other patients (85.6%) had non-urgent medical conditions such as non-urgent cardiovascular disease (18.9%), musculoskeletal pain (17.9%), non-cardiac chest pain (not further specified) (16.9%), psychogenic disorder (11.4%), gastrointestinal disorders (7.2%), respiratory disorders (5.3%), and other non-urgent diagnoses (8.0%).

### *Model development, performance and validation*

The base model with sex and age had an apparent c-statistic of 0.72 (95% CI 0.70-0.75), and an internal-external validation based c-statistic of 0.72 (95% 0.68-0.75) (Appendix- Table 6). The basic model shows that the risk of ACS increases with age for both sexes, with a notable peak risk for men at an age near 60 years and a more gradual increase in risk of ACS for women (Figure 2). The full model including all candidate predictors had an apparent c-statistic of 0.79 (95% CI 0.76-0.81) and an internal-external validation based c-statistic of 0.77 (95% CI 0.74-0.80) (Appendix - Table 7). The full model had optimal calibration (flexible line close to the 45-degree reference line) up to a predicted probability of ACS of approximately 0.2 (Appendix-Figure 1). Risks higher than 0.2 tended to be overestimated by the model, however since any plausible risk threshold will be lower than 0.2 in the primary care setting, we find the calibration in the relevant range to be satisfactory. After backward elimination, the backward model had an apparent c-statistic of 0.79 (95% CI 0.76-0.81), and the internal-external validation c-statistic was 0.77 (95% CI 0.74-0.79). It had very similar calibration to the full model (Table 3, Figure 3).

**Table 3. Final model for predicting the diagnosis ACS.**

| Predictors                             | Regression coefficients (standard error) |
|----------------------------------------|------------------------------------------|
| Intercept                              | -16.246 (3.527)                          |
| Age                                    | 0.293 (0.081)                            |
| Age'                                   | -0.391 (0.125)                           |
| Age''                                  | 1.063 (0.395)                            |
| Female gender                          | 2.504 (5.512)                            |
| Age * female gender                    | -0.096 (0.126)                           |
| Age' * female gender                   | 0.189 (0.195)                            |
| Age'' * female gender                  | -0.556 (0.605)                           |
| Acute chest pain shorter than 12 hours | 0.290 (0.198)                            |

|                                                             |               |
|-------------------------------------------------------------|---------------|
| Sweating                                                    | 0.457 (0.178) |
| Radiation of chest pain                                     | 0.609 (0.176) |
| Pressing heavy pain                                         | 0.747 (0.200) |
| Call during the night (0am-9am)                             | 0.504 (0.151) |
| Apparent c-statistic 0.79 (95% CI 0.76-0.81)                |               |
| Adjusted c-statistic 0.77 (95% CI 0.74-0.79)                |               |
| Calibration slope 0.826 (95% CI 0.658-0.994)                |               |
| Calibration -0.224 (95% CI -0.604-0.157)                    |               |
| R <sup>2</sup> 0.106                                        |               |
| Knots for cubic spline functions placed at 5, 35, 65 and 95 |               |

#### *Decision curve analyses and risk thresholds*

Both the full and backward model showed a high net benefit as compared to the currently used NTS model for telephone triage in OHS-PC (Figure 4). There was no difference in net benefit between the full model and backward model across plausible risk thresholds. Based on this analysis we decided to choose the backward as the final triage tool model because; 1) with fewer predictors the prediction of ACS remained similar accurate and 2) no valuable time is lost during telephone triage by asking the patient about symptoms that do not contribute to a better prediction. The final model included besides age and sex, the five following predictors; (i) acute onset of chest pain lasting <12 hours, (ii) a pressing/heavy character, (iii) radiation of pain, (iv) sweating, (v) calling at night between 0.00 and 9.00am. Finally, we evaluated the diagnostic performance of the final prediction model across risk thresholds that may be chosen to apply in clinical practice (Table 4, Figure 5).



**Table 4. Diagnostic accuracy for a range of risk thresholds of the final model**

| Risk threshold            | Sensitivity<br>(95% CI) | Specificity<br>(95% CI) | Positive<br>predictive value | Negative<br>predictive value |
|---------------------------|-------------------------|-------------------------|------------------------------|------------------------------|
| <b>0.001</b>              | 0.98 (0.95-0.99)        | 0.21 (0.18-0.24)        | 0.14                         | 0.99                         |
| <b>0.010</b>              | 0.98 (0.95-0.99)        | 0.42 (0.40-0.45)        | 0.18                         | 0.99                         |
| <b>0.020</b>              | 0.97 (0.94-0.99)        | 0.50 (0.47-0.54)        | 0.20                         | 0.99                         |
| <b>0.050</b>              | 0.93 (0.87-0.96)        | 0.63 (0.59-0.67)        | 0.25                         | 0.99                         |
| <b>0.075</b>              | 0.88 (0.81-0.92)        | 0.72 (0.68-0.76)        | 0.29                         | 0.98                         |
| <b>0.100</b>              | 0.81 (0.7-0.87)         | 0.79 (0.76-0.82)        | 0.33                         | 0.97                         |
| <b>0.115 (prevalence)</b> | 0.76 (0.67-0.83)        | 0.82 (0.79-0.85)        | 0.36                         | 0.96                         |
| <b>0.150</b>              | 0.64 (0.56-0.73)        | 0.88 (0.85-0.90)        | 0.41                         | 0.95                         |
| <b>0.200</b>              | 0.46 (0.38-0.55)        | 0.93 (0.91-0.94)        | 0.46                         | 0.93                         |

## Discussion

This is the first study that developed and internal-external validated a symptom-based prediction rule for telephone triage of ACS in male and female patients who contact OHS-PC for acute chest discomfort (pain, pressure, tightness, or discomfort). ACS was present in 8.3% of the females and 15.3% of the males. The prediction rule is applicable for triage in the OHS-PC setting and consists of sex and age as statistical interaction terms, and five other symptom-based predictors. It had a good discriminative ability (adjusted c-statistic 0.77 (95% CI 0.74-0.79)) and was well calibrated up to an ACS risk of 0.2.

### *Strengths and limitations*

The major strength of this study is that we analysed the original and very first conversations of patients with acute chest discomfort with primary health care providers and assessed these talks without knowledge of the diagnosis; the assessment of symptoms was therefore not affected by hindsight bias caused by knowledge of the final diagnosis.<sup>29</sup> Furthermore, we could analyse a large sample (N=2,192) of patients which allowed us to evaluate up to nineteen candidate predictors. We assessed the risk of selection due to missing outcome data, and our data suggest that this missingness was unlikely to bias our findings. Because we used data from seven different OHS-PC our results will be well generalizable to other OHS-PC in the Netherlands, but we anticipate the model might be applicable to similar OHS-PC

1  
2  
3 setting in for example the UK and Scandinavian countries. Our results may also be generalizable to some  
4 EMS settings, because the prior chance of having an ACS among those calling for acute chest discomfort  
5 is rather similar in the EMS setting as in the OHS-PC setting.<sup>14 30</sup>  
6  
7  
8

9  
10 A limitation of the study is that the final model is not yet fully externally validated. However, at the time  
11 of executing the study hardly any primary care research data were available to perform such validation.  
12 Importantly, the internal-external validation showed very good calibration up to an ACS risk of 0.2.  
13 Although, we performed extensive internal-external validation making use of the datasets of nine sites  
14 with substantial differences in case mix, we will strive for formal external validation before it can be  
15 widely applied in everyday primary care practice. Another limitation is that the effects of the predictors  
16 were assumed to be similar for male and female patients while that might not be optimal for the  
17 predictions. However, development of separate models for males and females would require a  
18 significantly larger sample size than was available. Importantly, a differential non-linear effect of age  
19 was incorporated using a spline function and interaction with sex was incorporated, and the final  
20 internal-external validated model did have good overall performance.  
21  
22  
23  
24  
25  
26  
27  
28  
29

### 30 *Comparison with other studies*

31 Our prediction model had a higher discriminating ability for ACS than the NTS (c-statistic of 0.58) and  
32 modified Grijseels prediction rule (c-statistic of 0.66).<sup>7</sup> This may largely be explained by the addition of  
33 age, the strongest predictor of ACS. This is in line with the notion that the prevalence of ACS increases  
34 with age.<sup>7 9 31</sup> Importantly, in our study among people aged below 40, only one (0.4%) male patient had  
35 an ACS (UAP). For males to the age of 55 we found a peak risk of ACS of around 20% and remaining at  
36 this level with further age increase onwards. For females we found a gradual increase of risk with age  
37 with a maximum ACS risk of around 18% for those aged over 80 years. Similar to the modified Grijseels  
38 prediction rule our prediction model includes sweating and radiation of pain, however, the modified  
39 Grijseels rule combined nausea and sweating to a single predictor (i.e., nausea or sweating).<sup>7 8</sup> Age and  
40 sex were predictors in our model, but also in the MHS and INTERCHEST prediction models.<sup>32 33</sup> Also the  
41 INTERCHEST rule included pressing heavy chest pain as predictor.<sup>32</sup> A new predictor is calling at night  
42 (between 0.00-9.00am).<sup>19</sup> Previous studies in the ED setting also showed circadian variability with an  
43 early morning peak for ACS patients.<sup>34</sup> Finally, symptoms associated with ACS were rather similar  
44 between females and males, which is in line with recent sex-stratified studies of patients with chest  
45 discomfort who called the OHS-PC, but is in contrast with the prevailing opinion.<sup>16 17 35</sup>  
46  
47  
48  
49  
50  
51  
52  
53  
54  
55  
56  
57  
58  
59  
60

1  
2  
3  
4  
5 We performed decision curve analyses to investigate what would be the optimal threshold of ACS  
6 predicted probability to initiate treatment, where 'treatment' in pre-hospital setting refers to urgent  
7 referral for hospital admission (U1, ambulance within 15 minutes). However, there is a principal  
8 difference between diagnostic probability and categories of urgencies. Risk prediction provides a  
9 continuous value of the probability of disease, while urgency level categorisation is based on the  
10 interpretation of how risk probability can be translated in urgency, and time within a patient should be  
11 seen and treatment delivered. Context is needed to determine optimal thresholds, which concerns what  
12 percentage of missing ACS is considered as acceptable by health care providers, patients and  
13 policymakers. This percentage is expected to be very low because a missed ACS can result in permanent  
14 cardiac impairment, heart failure, life-threatening arrhythmias in the early phase, and death.<sup>36</sup>  
15 Furthermore missing an ACS is the most common reason for malpractice claims worldwide.<sup>37</sup> A survey  
16 performed among 1,029 ED doctors in the US, New Zealand and Australia showed that they considered  
17 an average missing rate between 0.1-1% (range 0-10%) as acceptable.<sup>38</sup> When we apply a maximum of  
18 1% missing with our prediction rules, the threshold has to be set at a predicted risk of ACS of 0.05  
19 (negative predictive value of 0.99, Table 6), which means based on our data that the majority of patients  
20 needs urgent referral. This would result in over-crowded EMS and EDs, and with the available resources  
21 being limited, this may result in exceeding target triage times, which could compromise patient safety in  
22 another way.<sup>39</sup> A possible alternative to consider may be applying different 'treatments' per thresholds,  
23 i.e. dispatching an ambulance (U1) for the high predicted risk patients, and GP visit within one hour (U2)  
24 for the low predicted risk patients. During GP visit more clinical parameters (blood pressure, heart rate,  
25 overall clinical impression) can be gathered to improve ACS risk prediction, and in the future, there  
26 might be room for applying point-of-care high-sensitivity troponin testing, as these are nowadays only  
27 available in the ED setting.<sup>40</sup> In order to determine the ideal threshold, external validation will be  
28 needed combined with clinical and management considerations. The development of this diagnostic  
29 model is the necessary first step towards an implementation study in which this model is adapted to  
30 urgency levels that can be applied by triage nurses during telephone triage at the OHS-PC. The  
31 diagnostic model needs to be 'translated' in simple yes/no questions that can be incorporated in the  
32 existing NTS and a personalized risk prediction for age and gender is generated. Some older questions  
33 will then be substituted. We are aiming to do so in an implementation study applying action research.

34 *Implications for clinical practice and future research*  
35  
36  
37  
38  
39  
40  
41  
42  
43  
44  
45  
46  
47  
48  
49  
50  
51  
52  
53

1  
2  
3 This symptom-based prediction model for ACS has good discrimination and calibration and could readily  
4 be applied for telephone triage of patients with acute chest discomfort in primary care, notably the  
5 OHS-PC setting. The results of the decision curve analysis showed a large net benefit over a range of  
6 plausible risk threshold as compared to the currently used NTS model in the OHS-PC in the Netherlands.  
7  
8 For future research, full external validation in other OHS-PC or EMS populations could further optimize  
9 and update the model. Furthermore, sex-specific prediction models could be developed for ACS, but  
10 given the overlap in symptoms between men and women, this would not result in major changes in  
11 predictors.  
12  
13  
14  
15  
16  
17

### 18 **Conclusion**

19  
20 The final prediction model for ACS has good discrimination and calibration, and shows promise for  
21 replacing the existing telephone triage rules for patients with acute chest discomfort in general practice  
22 and OHS-PC. However, future research with external validation needs to provide insights into how the  
23 prediction model can be applied in practice  
24  
25  
26  
27  
28  
29  
30  
31  
32  
33  
34  
35  
36  
37  
38  
39  
40  
41  
42  
43  
44  
45  
46  
47  
48  
49  
50  
51  
52  
53  
54  
55  
56  
57  
58  
59  
60

### **Ethical approval**

The study (National Trial Register identification number: NTR7331) was approved by the Medical Ethics Committee Utrecht, the Netherlands (reference number WAG/mb/16/003208) and complied with the Declaration of Helsinki. A waiver of informed consent was given because our study had minimal risk to subjects and could otherwise not be carried out logistically. Personal and research data were handled and stored according to the European General Data Protection Regulation.

**Acknowledgements** The authors would like to thank the OHS-PC foundation 'Primair Huisartsenposten' and all employees of the participating locations for or their cooperation in this study, notably for providing data and technical support.

**Funding** This study was funded by an unrestricted grant from (i) the department of general practice of the University Medical Centre Utrecht, (ii) a personal promotion grant of D.L. Zwart, MD, PhD, (iii) the foundation 'The Netherlands Triage Standard', and (iv) the foundation 'Stoffels-Hornstra'. This study contributes to the 2020B004 IMPRESS study which is funded by the Dutch Heart Foundation/Dutch Cardiovascular Alliance (DHF/DCVA).

**Competing interest statement** All authors declare they have no conflict of interest. All authors have seen and agree with the contents of the manuscript and there is no financial interest to report. We certify that the submission is original work and is not under review at any other publication.

**Data sharing statement** Data can be made available for researchers whose proposed use of the data has been approved at request of the corresponding author, with a signed data access agreement.

**Author contribution** FR and DZ are the lead investigators who conceived the research idea and methodology. Funding acquisition was done by FR, DZ and RD. LW and DE conducted data acquisition. LW performed the analyses and wrote the first draft of the manuscript. She was supervised by FR and DZ, who critically revised the manuscript, and by MvS who was involved with the analyses. DE, EdG, EA, HdR, AH and RD contributed to and approved of the final version of the manuscript.

## References

1. Rui P, Kang K. National Hospital Ambulatory Medical Care Survey: 2017 Emergency Department Summary Tables. In: Statistics NCfH, ed., 2017.
2. Mol KA, Smoczynska A, Rahel BM, et al. Non-cardiac chest pain: prognosis and secondary healthcare utilisation. *Open Heart* 2018;5(2):e000859. doi: 10.1136/openhrt-2018-000859
3. Collet JP, Thiele H, Barbato E, et al. 2020 ESC Guidelines for the management of acute coronary syndromes in patients presenting without persistent ST-segment elevation. *Rev Esp Cardiol (Engl Ed)* 2021;74(6):544. doi: 10.1016/j.rec.2021.05.002
4. Burman RA, Zakariassen E, Hunnskaar S. Management of chest pain: a prospective study from Norwegian out-of-hours primary care. *BMC family practice* 2014;15:51. doi: 10.1186/1471-2296-15-51
5. Deakin CD, Sherwood DM, Smith A, et al. Does telephone triage of emergency (999) calls using Advanced Medical Priority Dispatch (AMPDS) with Department of Health (DH) call prioritisation effectively identify patients with an acute coronary syndrome? An audit of 42,657 emergency calls to Hampshire Ambulance Service NHS Trust. *Emergency medicine journal : EMJ* 2006;23(3):232-5. doi: 10.1136/emj.2004.022962
6. Bruyninckx R, Aertgeerts B, Bruyninckx P, et al. Signs and symptoms in diagnosing acute myocardial infarction and acute coronary syndrome: a diagnostic meta-analysis. *The British journal of general practice : the journal of the Royal College of General Practitioners* 2008;58(547):105-11. doi: 10.3399/bjgp08X277014
7. Bruins Slot MH, Rutten FH, van der Heijden GJ, et al. Diagnosing acute coronary syndrome in primary care: comparison of the physicians' risk estimation and a clinical decision rule. *Family practice* 2011;28(3):323-8. doi: 10.1093/fampra/cmq116
8. Grijseels EW, Deckers JW, Hoes AW, et al. Implementation of a pre-hospital decision rule in general practice. Triage of patients with suspected myocardial infarction. *European heart journal* 1996;17(1):89-95.
9. Harskamp RE, Laeven SC, Himmelreich JC, et al. Chest pain in general practice: a systematic review of prediction rules. *BMJ open* 2019;9(2):e027081. doi: 10.1136/bmjopen-2018-027081
10. Wouters LT, Rutten FH, Erkelens DC, et al. Accuracy of telephone triage in primary care patients with chest discomfort: a cross-sectional study. *Open Heart* 2020;7(2) doi: 10.1136/openhrt-2020-001376

- 1  
2  
3 11. Leite L, Baptista R, Leitaó J, et al. Chest pain in the emergency department: risk stratification with  
4 Manchester triage system and HEART score. *BMC cardiovascular disorders* 2015;15:48. doi:  
5 10.1186/s12872-015-0049-6  
6  
7
- 8 12. Leeflang MM, Rutjes AW, Reitsma JB, et al. Variation of a test's sensitivity and specificity with  
9 disease prevalence. *CMAJ : Canadian Medical Association journal = journal de l'Association  
10 medicale canadienne* 2013;185(11):E537-44. doi: 10.1503/cmaj.121286  
11  
12
- 13 13. Buntinx F, Knockaert D, Bruyninckx R, et al. Chest pain in general practice or in the hospital  
14 emergency department: is it the same? *Family practice* 2001;18(6):586-9.  
15  
16
- 17 14. Rawshani A, Larsson A, Gelang C, et al. Characteristics and outcome among patients who dial for the  
18 EMS due to chest pain. *International journal of cardiology* 2014;176(3):859-65. doi:  
19 10.1016/j.ijcard.2014.08.004  
20  
21
- 22 15. Kuriyama A, Urushidani S, Nakayama T. Five-level emergency triage systems: variation in assessment  
23 of validity. *Emergency medicine journal : EMJ* 2017;34(11):703-10. doi: 10.1136/emered-2016-  
24 206295  
25  
26
- 27 16. van der Meer MG, Appelman Y, Rutten KHG, et al. Are there gender disparities in symptom  
28 presentation or triage of patients with chest discomfort at primary care out-of-hours services?  
29 An observational study. *BMJ open* 2019;9(11):e031613. doi: 10.1136/bmjopen-2019-031613  
30  
31
- 32 17. Wouters LTCM, Zwart DLM, Erkelens DCA, et al. Gender-stratified analyses of symptoms associated  
33 with acute coronary syndrome in telephone triage: a cross-sectional study. *BMJ open* 2021;11  
34 doi: 10.1136/bmjopen-2020-042406  
35  
36
- 37 18. Erkelens DC, Wouters LT, Zwart DL, et al. Optimisation of telephone triage of callers with symptoms  
38 suggestive of acute cardiovascular disease in out-of-hours primary care: observational design of  
39 the Safety First study. *BMJ open* 2019;9(7):e027477. doi: 10.1136/bmjopen-2018-027477  
40  
41
- 42 19. Wouters LT, Zwart DL, Erkelens DC, et al. Chest discomfort at night and risk of acute coronary  
43 syndrome: cross-sectional study of telephone conversations. *Family practice* 2020 doi:  
44 10.1093/fampra/cmaa005  
45  
46
- 47 20. Riley RD, Ensor J, Snell KIE, et al. Calculating the sample size required for developing a clinical  
48 prediction model. *BMJ* 2020;368:m441. doi: 10.1136/bmj.m441  
49  
50
- 51 21. van Smeden M, Moons KG, de Groot JA, et al. Sample size for binary logistic prediction models:  
52 Beyond events per variable criteria. *Stat Methods Med Res* 2019;28(8):2455-74. doi:  
53 10.1177/0962280218784726  
54  
55  
56  
57  
58  
59  
60

- 1  
2  
3 22. Steyerberg EW, Harrell FE, Jr. Prediction models need appropriate internal, internal-external, and  
4 external validation. *Journal of clinical epidemiology* 2016;69:245-7. doi:  
5 10.1016/j.jclinepi.2015.04.005  
6  
7  
8 23. Wynants L, van Smeden M, McLernon DJ, et al. Three myths about risk thresholds for prediction  
9 models. *BMC medicine* 2019;17(1):192. doi: 10.1186/s12916-019-1425-3  
10  
11 24. Reitsma JB, Glas AS, Rutjes AW, et al. Bivariate analysis of sensitivity and specificity produces  
12 informative summary measures in diagnostic reviews. *Journal of clinical epidemiology*  
13 2005;58(10):982-90. doi: 10.1016/j.jclinepi.2005.02.022  
14  
15 25. Jolani S, Debray TP, Koffijberg H, et al. Imputation of systematically missing predictors in an  
16 individual participant data meta-analysis: a generalized approach using MICE. *Stat Med*  
17 2015;34(11):1841-63. doi: 10.1002/sim.6451  
18  
19 26. Rubin DB. Multiple imputation for non response in surveys. *John Wiley & Sons, Hoboken, NJ* 1987  
20  
21 27. Harrell FE, Jr. Regression Modeling Strategies: With Applications to Linear Models, Logistic and  
22 Ordinal Regression, and Survival Analysis. . Second edition ed. Cham, Switzerland: Springer  
23 International 2015.  
24  
25 28. Moons KG, Altman DG, Reitsma JB, et al. Transparent Reporting of a multivariable prediction model  
26 for Individual Prognosis or Diagnosis (TRIPOD): explanation and elaboration. *Annals of internal*  
27 *medicine* 2015;162(1):W1-73. doi: 10.7326/M14-0698  
28  
29 29. Zwaan L, Monteiro S, Sherbino J, et al. Is bias in the eye of the beholder? A vignette study to assess  
30 recognition of cognitive biases in clinical case workups. *BMJ Qual Saf* 2017;26(2):104-10. doi:  
31 10.1136/bmjqs-2015-005014  
32  
33 30. Scott G, Clawson JJ, Gardett I, et al. 9-1-1 Triage of Non-Traumatic Chest Pain: Association with  
34 Hospital Diagnosis. *Prehosp Emerg Care* 2017;21(4):525-34. doi:  
35 10.1080/10903127.2017.1302530  
36  
37 31. Canto JG, Rogers WJ, Goldberg RJ, et al. Association of age and sex with myocardial infarction  
38 symptom presentation and in-hospital mortality. *Jama* 2012;307(8):813-22. doi:  
39 10.1001/jama.2012.199  
40  
41 32. International Working Group on Chest Pain in Primary C, Aerts M, Minalu G, et al. Pooled individual  
42 patient data from five countries were used to derive a clinical prediction rule for coronary artery  
43 disease in primary care. *Journal of clinical epidemiology* 2017;81:120-28. doi:  
44 10.1016/j.jclinepi.2016.09.011  
45  
46  
47  
48  
49  
50  
51  
52  
53  
54  
55  
56  
57  
58  
59  
60



- 1  
2  
3 33. Haasenritter J, Donner-Banzhoff N, Bosner S. Chest pain for coronary heart disease in general  
4 practice: clinical judgement and a clinical decision rule. *The British journal of general practice :  
5 the journal of the Royal College of General Practitioners* 2015;65(640):e748-53. doi:  
6 10.3399/bjgp15X687385  
7  
8  
9  
10 34. Ekelund U, Akbarzadeh M, Khoshnood A, et al. Likelihood of acute coronary syndrome in emergency  
11 department chest pain patients varies with time of presentation. *BMC Res Notes* 2012;5:420.  
12 doi: 10.1186/1756-0500-5-420  
13  
14  
15 35. van Oosterhout REM, de Boer AR, Maas A, et al. Sex Differences in Symptom Presentation in Acute  
16 Coronary Syndromes: A Systematic Review and Meta-analysis. *J Am Heart Assoc*  
17 2020;9(9):e014733. doi: 10.1161/JAHA.119.014733  
18  
19  
20 36. Bugiardini R, Ricci B, Cenko E, et al. Delayed Care and Mortality Among Women and Men With  
21 Myocardial Infarction. *J Am Heart Assoc* 2017;6(8) doi: 10.1161/JAHA.117.005968 [published  
22 Online First: 2017/09/02]  
23  
24  
25 37. Ernesater A, Winblad U, Engstrom M, et al. Malpractice claims regarding calls to Swedish telephone  
26 advice nursing: what went wrong and why? *J Telemed Telecare* 2012;18(7):379-83. doi:  
27 10.1258/jtt.2012.120416  
28  
29  
30 38. Than M, Herbert M, Flaws D, et al. What is an acceptable risk of major adverse cardiac event in chest  
31 pain patients soon after discharge from the Emergency Department?: a clinical survey.  
32 *International journal of cardiology* 2013;166(3):752-4. doi: 10.1016/j.ijcard.2012.09.171  
33  
34  
35 39. van der Linden MC, Meester BE, van der Linden N. Emergency department crowding affects triage  
36 processes. *Int Emerg Nurs* 2016;29:27-31. doi: 10.1016/j.ienj.2016.02.003  
37  
38  
39 40. Pickering JW, Young JM, George PM, et al. Validity of a Novel Point-of-Care Troponin Assay for  
40 Single-Test Rule-Out of Acute Myocardial Infarction. *JAMA Cardiol* 2018;3(11):1108-12. doi:  
41 10.1001/jamacardio.2018.3368  
42  
43  
44  
45  
46  
47  
48  
49  
50  
51  
52  
53  
54  
55  
56  
57  
58  
59  
60

1  
2  
3 **Figure legends**

4 **Figure 1. Flowchart of study population.**

5  
6 **Figure 2. Base model with age and sex for predicting diagnosis acute coronary syndrome.**

7  
8 **Figure 3. Calibration of final model with internal external validation.**

9  
10 **Figure 4. Decision curve analyses comparing the full and final models versus the currently used model**  
11 **and versus treat all patients.**

12  
13 **Figure 5. Runway plot of diagnostic accuracy measures of the final model.**  
14  
15  
16  
17  
18  
19  
20  
21  
22  
23  
24  
25  
26  
27  
28  
29  
30  
31  
32  
33  
34  
35  
36  
37  
38  
39  
40  
41  
42  
43  
44  
45  
46  
47  
48  
49  
50  
51  
52  
53  
54  
55  
56  
57  
58  
59  
60

1  
2  
3  
4  
5  
6  
7  
8  
9  
10  
11  
12  
13  
14  
15  
16  
17  
18  
19  
20  
21  
22  
23  
24  
25  
26  
27  
28  
29  
30  
31  
32  
33  
34  
35  
36  
37  
38  
39  
40  
41  
42  
43  
44  
45  
46  
47  
48  
49  
50  
51  
52  
53  
54  
55  
56  
57  
58  
59  
60

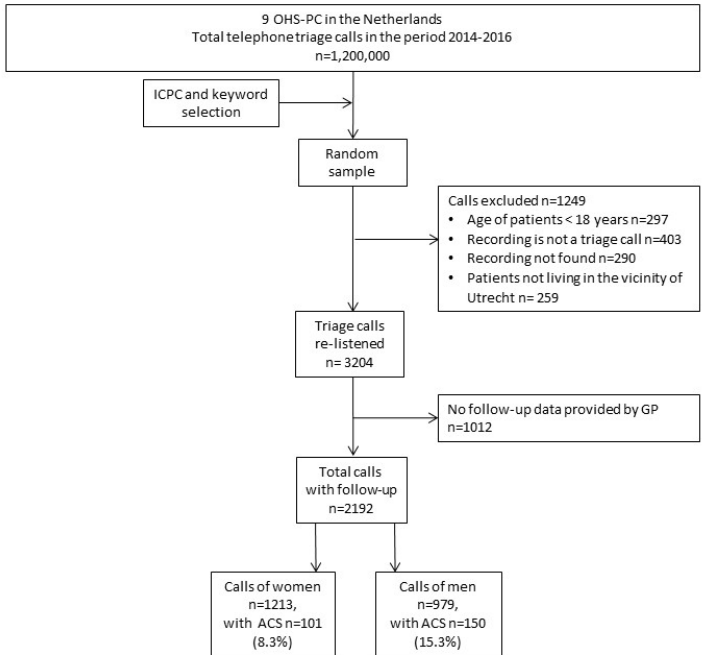

Figure 1

254x190mm (96 x 96 DPI)

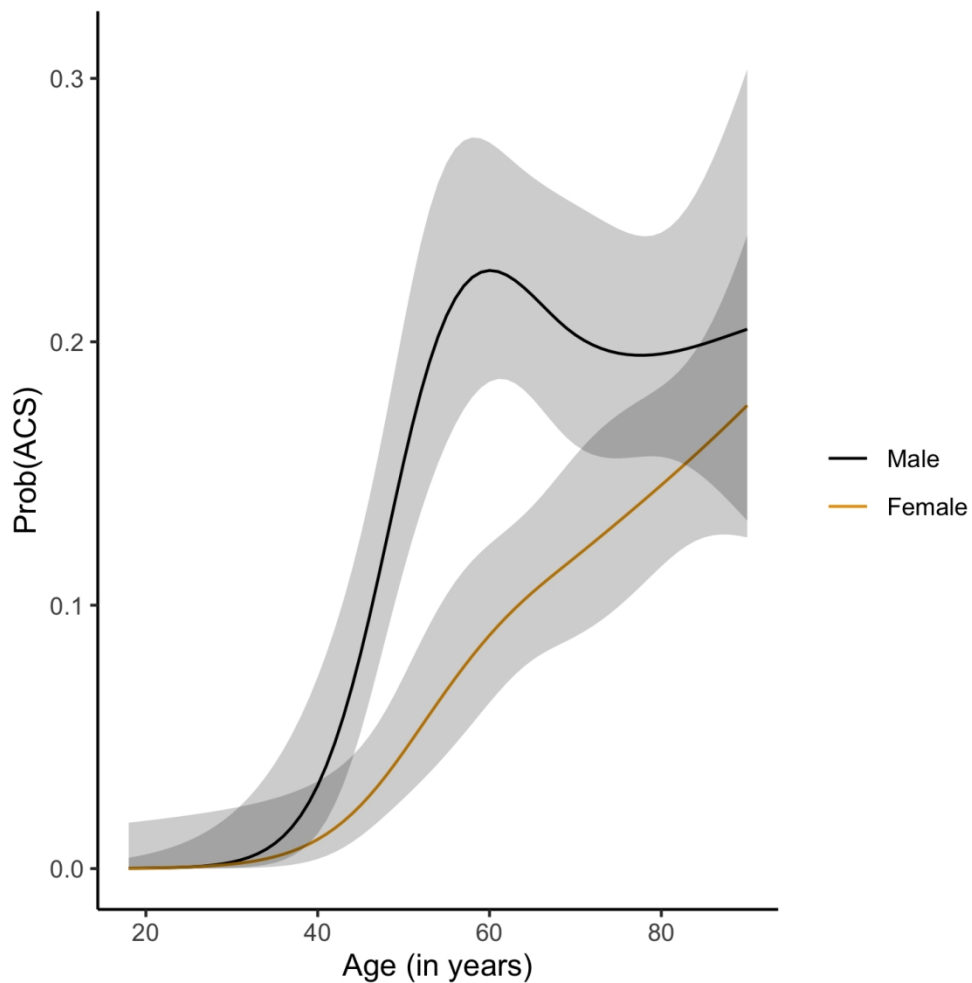

Figure 2

1360x1360mm (28 x 28 DPI)

1  
2  
3  
4  
5  
6  
7  
8  
9  
10  
11  
12  
13  
14  
15  
16  
17  
18  
19  
20  
21  
22  
23  
24  
25  
26  
27  
28  
29  
30  
31  
32  
33  
34  
35  
36  
37  
38  
39  
40  
41  
42  
43  
44  
45  
46  
47  
48  
49  
50  
51  
52  
53  
54  
55  
56  
57  
58  
59  
60

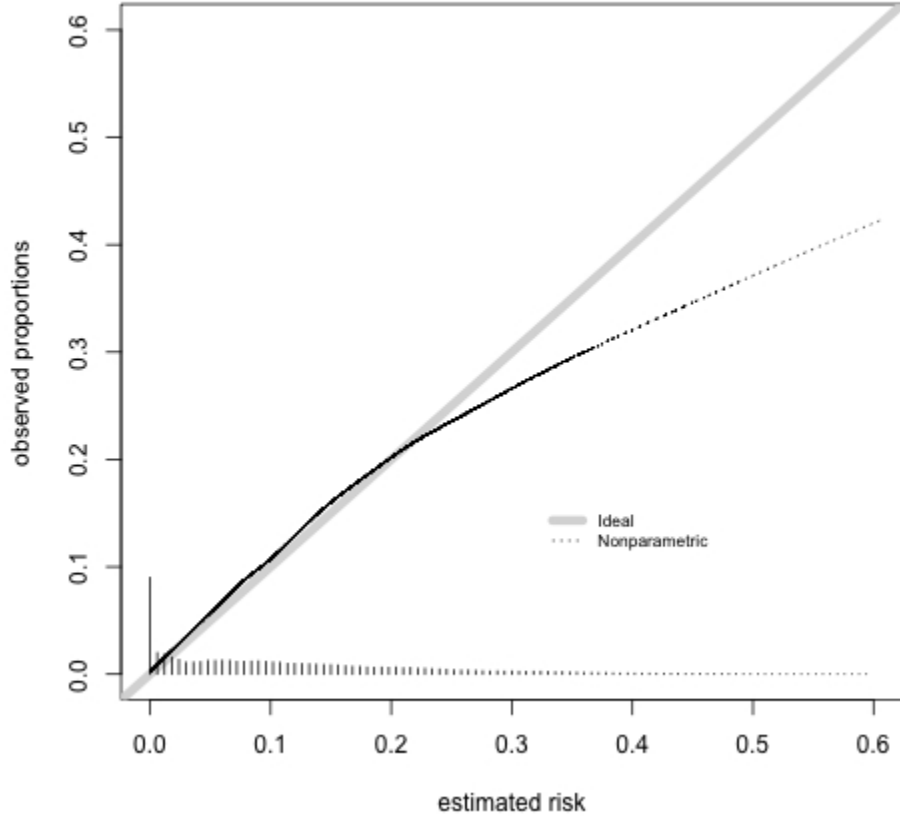

169x169mm (72 x 72 DPI)

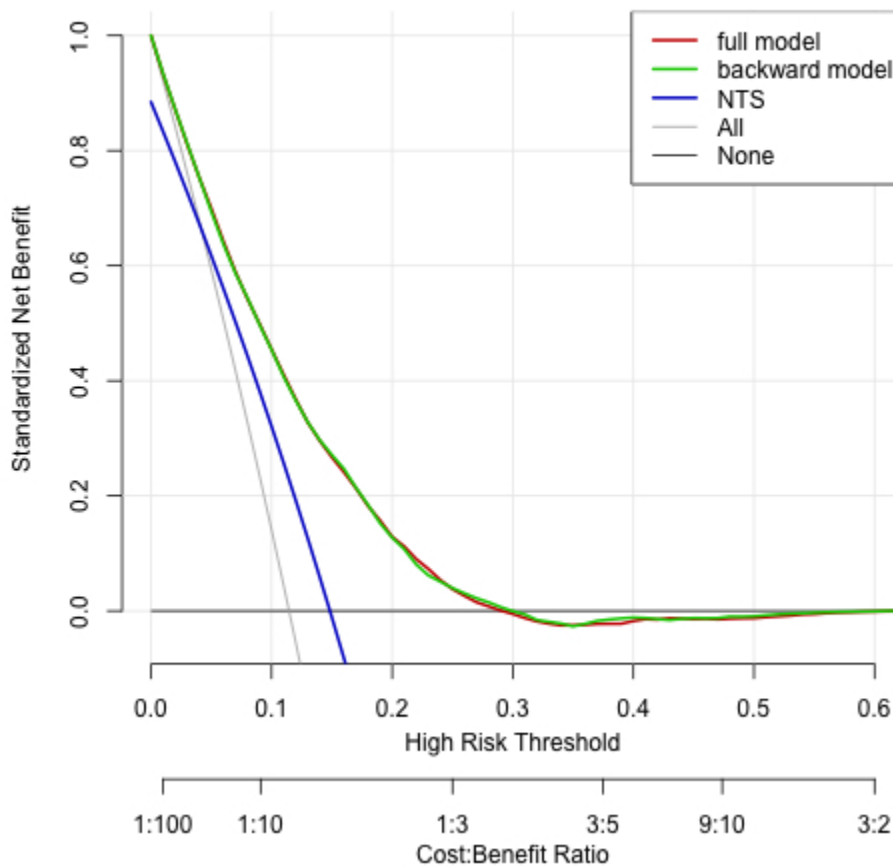

169x169mm (72 x 72 DPI)

1  
2  
3  
4  
5  
6  
7  
8  
9  
10  
11  
12  
13  
14  
15  
16  
17  
18  
19  
20  
21  
22  
23  
24  
25  
26  
27  
28  
29  
30  
31  
32  
33  
34  
35  
36  
37  
38  
39  
40  
41  
42  
43  
44  
45  
46  
47  
48  
49  
50  
51  
52  
53  
54  
55  
56  
57  
58  
59  
60

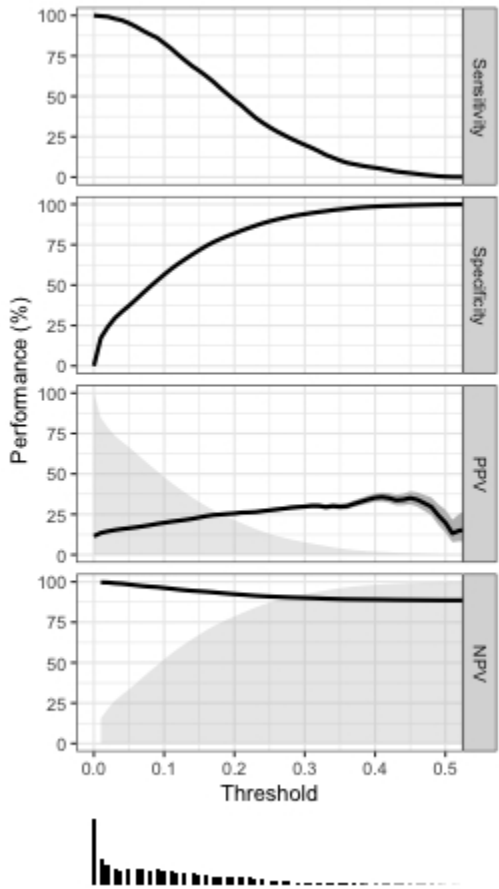

169x169mm (72 x 72 DPI)

## Appendices

**Appendix - Table 1. NTS urgency levels and response times**

| NTS Urgency level                             | Definition                                | Response time                      | Medical help                              |
|-----------------------------------------------|-------------------------------------------|------------------------------------|-------------------------------------------|
| U0 – Resuscitation                            | Loss of vital functions                   | Immediately                        | Ambulance                                 |
| U1 – Life threatening                         | Unstable vital functions                  | Immediately, within 15 minutes     | Ambulance                                 |
| U2 – Emergent                                 | Vital functions in danger or organ damage | As soon as possible, within 1 hour | Home visit by GP or appointment at OHS-PC |
| U3 – Urgent                                   | Possible risk of damage, human reasons    | A few hours (<3 hours)             | Home visit by GP or appointment at OHS-PC |
| U4 – Non-urgent                               | Marginal risk of damage                   | 24 hours                           | Appointment at OHS-PC or telephone advice |
| U5 – Advice                                   | No risk of damage                         | Advice, no time related            | Telephone advice                          |
| GP: general practitioner                      |                                           |                                    |                                           |
| NTS: Netherlands Triage Standard              |                                           |                                    |                                           |
| OHS-PC: out-of-hours services in primary care |                                           |                                    |                                           |



**Appendix-table 2: Combinations of NTS triage criteria that generate an U1 level within the NTS main complaints that can be used for patients with chest discomfort.**

|                                                                                                                                                                                                                                                                                                                                                                                                              |                                                                                               |                                                                                                                                                                                                                                                            |                                                      |
|--------------------------------------------------------------------------------------------------------------------------------------------------------------------------------------------------------------------------------------------------------------------------------------------------------------------------------------------------------------------------------------------------------------|-----------------------------------------------------------------------------------------------|------------------------------------------------------------------------------------------------------------------------------------------------------------------------------------------------------------------------------------------------------------|------------------------------------------------------|
| → ABCD unstable (no main complaint is selected)                                                                                                                                                                                                                                                                                                                                                              |                                                                                               |                                                                                                                                                                                                                                                            | <b>Urgency level U1: ambulance within 15 minutes</b> |
| Main complaint 'Chest pain'                                                                                                                                                                                                                                                                                                                                                                                  |                                                                                               |                                                                                                                                                                                                                                                            |                                                      |
| → ABCD stable                                                                                                                                                                                                                                                                                                                                                                                                | AND severe chest pain (Numeric Rating Scale (NRS)-score $\geq 8$ ) lasting less than 12 hours |                                                                                                                                                                                                                                                            |                                                      |
| → ABCD stable                                                                                                                                                                                                                                                                                                                                                                                                | AND mild (NRS $\leq 4$ ) to moderate (NRS 5-7) chest pain lasting for less than 12 hours      | AND one of the following:<br>- retrosternal located pain<br>- tightening or pressing<br>- radiation to jaw, arm or upper back<br>- progressive pain intensity in short time<br>- past or present autonomous nervous system-related symptoms<br>- dizziness |                                                      |
| Main complaint 'Collapse'                                                                                                                                                                                                                                                                                                                                                                                    |                                                                                               |                                                                                                                                                                                                                                                            |                                                      |
| → ABCD stable                                                                                                                                                                                                                                                                                                                                                                                                | AND collapse                                                                                  | AND chest pain of any severity                                                                                                                                                                                                                             |                                                      |
| Main complaint 'Back complaints'                                                                                                                                                                                                                                                                                                                                                                             |                                                                                               |                                                                                                                                                                                                                                                            |                                                      |
| → ABCD stable                                                                                                                                                                                                                                                                                                                                                                                                | AND severe upper back pain (NRS $\geq 8$ )                                                    | AND past or present autonomous nervous system-related symptoms                                                                                                                                                                                             |                                                      |
| <p>ABCD: acronym for Airway, Breathing, Circulation and Disability. When the triage nurse starts the telephone triage with the NTS, the system requires a mandatory 'ABCD-check'; i.e. the triage nurse has to ask questions to assess whether the patient has life-threatening problems concerning the Airway, Breathing, Circulation and Disability for which an ambulance should be sent immediately.</p> |                                                                                               |                                                                                                                                                                                                                                                            |                                                      |

**Appendix-table 3. Characteristics of patients divided among the seven OHS-PC locations.**

| Characteristics         | Location A                    | Location B                     | Location C                     | Location D                     | Location E                    | Location F                     | Location G                     |
|-------------------------|-------------------------------|--------------------------------|--------------------------------|--------------------------------|-------------------------------|--------------------------------|--------------------------------|
|                         | <b>N=205</b><br><b>(9.4%)</b> | <b>N=355</b><br><b>(16.2%)</b> | <b>N=544</b><br><b>(24.8%)</b> | <b>N=262</b><br><b>(12.0%)</b> | <b>N=164</b><br><b>(7.5%)</b> | <b>N=412</b><br><b>(18.8%)</b> | <b>N=250</b><br><b>(11.4%)</b> |
| Prevalence of ACS (n,%) | 32 (15.4%)                    | 31 (8.7%)                      | 59 (10.8%)                     | 35 (13.4%)                     | 15 (9.1%)                     | 53 (12.9%)                     | 26 (10.4%)                     |
| Male sex (n,%)          | 77 (37.6%)                    | 154 (43.4%)                    | 256 (47.1%)                    | 108 (41.2%)                    | 84 (51.2%)                    | 188 (45.6%)                    | 112 (44.8%)                    |
| Mean age in years (SD)  | 62.3 (19.6)                   | 58.6 (19.8)                    | 58.0 (19.4)                    | 56.6 (18.9)                    | 61.8 (20.5)                   | 61.6 (19.4)                    | 56.1 (18.7)                    |

**Appendix – table 4. Overview of the percentages of missing predictors, divided into patients with and without the diagnosis ACS.**

| Characteristics<br>N=2192                      | ACS, n=251<br>(11.5%)<br>Missing (%) | No ACS, n=1941<br>(88.5%)<br>Missing (%) |
|------------------------------------------------|--------------------------------------|------------------------------------------|
| Mean in years age (SD)                         | 0                                    | 0                                        |
| Female sex                                     | 0                                    | 0                                        |
| Median call duration in min (IQR)              | 0                                    | 0                                        |
| Mean patient's introduction in min (IQR)       | 0                                    | 0                                        |
| Triage nurse consulted the GP                  | 0                                    | 0                                        |
| Someone else called on behalf of patient       | 0                                    | 0                                        |
| The person who calls expressed concerns        | 144 (57.3)                           | 943 (48.6)                               |
| Cardiovascular disease or risk factor combined | 30 (12.0)                            | 318 (16.4)                               |
| History of coronary artery disease             | 107 (42.6)                           | 933 (48.1)                               |
| Diabetes                                       | 162 (64.5)                           | 1126 (58.0)                              |
| Hypertension                                   | 172 (68.5)                           | 1126 (58.0)                              |
| Hypercholesterolemia/statin use                | 172 (68.5)                           | 1196 (61.6)                              |
| Cardiac arrhythmia                             | 176 (70.1)                           | 1110 (57.2)                              |
| Chest pain                                     | 4 (1.6)                              | 72 (3.7)                                 |

|                                                                                                                                                                                                                                                     |            |             |
|-----------------------------------------------------------------------------------------------------------------------------------------------------------------------------------------------------------------------------------------------------|------------|-------------|
| Shortness of breath                                                                                                                                                                                                                                 | 68 (27.1)  | 429 (22.1)  |
| Chest pain duration <12 hours                                                                                                                                                                                                                       | 28 (11.2)  | 242 (13.1)  |
| Pain intensity severe (NRS >7 in range 1-10)                                                                                                                                                                                                        | 149 (59.4) | 1124 (57.9) |
| Pressing heavy pain*                                                                                                                                                                                                                                | 63 (25.1)  | 502 (25.9)  |
| Stabbing chest pain*                                                                                                                                                                                                                                | 63 (25.1)  | 502 (25.9)  |
| Chest pain located retrosternal**                                                                                                                                                                                                                   | 87 (34.7)  | 538 (27.7)  |
| Chest pain located left or right on thorax**                                                                                                                                                                                                        | 87 (34.7)  | 538 (27.7)  |
| Radiation of chest pain to any location                                                                                                                                                                                                             | 38 (15.1)  | 476 (24.5)  |
| Radiation to the arm ***                                                                                                                                                                                                                            | 94 (37.5)  | 1019 (52.5) |
| Radiation to the shoulder blades ***                                                                                                                                                                                                                | 94 (37.5)  | 1019 (52.5) |
| Radiation to the jaws ***                                                                                                                                                                                                                           | 94 (37.5)  | 1019 (52.5) |
| Sweating                                                                                                                                                                                                                                            | 79 (31.5)  | 747 (38.5)  |
| Nausea or vomiting                                                                                                                                                                                                                                  | 133 (53.0) | 1071 (55.2) |
| Pallor or ashen skin                                                                                                                                                                                                                                | 158 (62.9) | 1361 (70.1) |
| (Near) fainting                                                                                                                                                                                                                                     | 33 (13.1)  | 217 (11.2)  |
| Palpitations                                                                                                                                                                                                                                        | 225 (89.6) | 1615 (83.2) |
| Patient recognizes symptoms from previous cardiac event                                                                                                                                                                                             | 139 (55.4) | 1137 (58.6) |
| *Pain described by patient. Pressing heavy pain: pressing, heavy or tightening pain vs. other types of pain (stabbing, burning, cramping, tearing) Stabbing pain: stabbing vs. other types of pain (pressing, heavy, tightening, burning, cramping) |            |             |
| ** Retrosternal location vs. other pain locations. Left or right side thorax vs. other pain locations                                                                                                                                               |            |             |
| *** Radiation location vs. no radiation and radiation other pain                                                                                                                                                                                    |            |             |

**Appendix-table 5. Patient and call characteristics of 3,204 patients with chest discomfort calling OHS-PC between 2014-2017, comparing patients with and without information on the study outcome.**

| Characteristics<br>N=3,204                             | Follow-up<br>n= 2192 (68.4%) | No follow-up<br>n= 1012 (31.6%) | P-value |
|--------------------------------------------------------|------------------------------|---------------------------------|---------|
| <b>Patient characteristics</b>                         |                              |                                 |         |
| Median age in years (IQR) (n=3,204)                    | 59.1 (19.5)                  | 57.3 (20.4)                     | 0.020   |
| Female sex (n=3,204)                                   | 1213 (55.3)                  | 565 (55.8)                      | 0.794   |
| <b>Call characteristics</b>                            |                              |                                 |         |
| Median total call duration in min (IQR) (n=3,204)      | 6:51 (4:59-9:23)             | 6:56 (5:04-9:15)                | 0.836   |
| Mean patient's introduction in min (IQR) (n=3,204)     | 0:17 (0:11-0:25)             | 0:17 (0:11-0:26)                | 0.052   |
| Triage nurse consulted the GP (n=3,204)                | 1147 (52.3)                  | 519 (51.3)                      | 0.583   |
| Someone else called on behalf of patient (n=3,204)     | 1114 (50.8)                  | 479 (47.3)                      | 0.066   |
| Person who calls expressed concerns (n=1,478)          | 988 (89.7)                   | 430 (90.1)                      | 0.804   |
| <b>Medical history and risk factors</b>                |                              |                                 |         |
| Cardiovascular disease or CV risk factor (n=2,672)     | 1192 (64.6)                  | 515 (62.3)                      | 0.254   |
| History of coronary artery disease (n=1,663)           | 389 (33.8)                   | 166 (32.4)                      | 0.573   |
| Diabetes (n=1,283)                                     | 180 (19.9)                   | 68 (18.0)                       | 0.432   |
| Hypertension (n=1,274)                                 | 323 (36.1)                   | 121 (31.9)                      | 0.150   |
| Hypercholesterolemia/statin use (n=1,176)              | 212 (25.7)                   | 88 (25.1)                       | 0.842   |
| Cardiac arrhythmia (n=1,326)                           | 230 (25.4)                   | 102 (24.3)                      | 0.684   |
| <b>Symptoms</b>                                        |                              |                                 |         |
| Chest pain (n=3,079)                                   | 1981 (93.6)                  | 894 (92.8)                      | 0.417   |
| Shortness of breath (n=2,505)                          | 1094 (64.5)                  | 520 (64.3)                      | 0.911   |
| Chest pain duration <12 hours (n=2,793)                | 1403 (73.2)                  | 610 (69.6)                      | 0.052   |
| Severe pain (NRS >7 in range 1-10) (n=1,351)           | 337 (36.6)                   | 185 (43.0)                      | 0.024   |
| Pressing, heavy pain* (n=2,347)                        | 1023 (62.9)                  | 444 (61.6)                      | 0.538   |
| Stabbing chest pain* (n=2,349)                         | 366 (22.5)                   | 177 (24.5)                      | 0.280   |
| Chest pain located retrosternal** (n=2,298)            | 641 (40.9)                   | 294 (40.2)                      | 0.736   |
| Chest pain located left or right on thorax** (n=2,299) | 627 (40.0)                   | 294 (40.2)                      | 0.945   |
| Radiation of chest pain to any location (n=2,437)      | 1077 (64.3)                  | 458 (60.1)                      | 0.047   |
| Radiation to the arm ***(n=1,521)                      | 452 (42.2)                   | 179 (39.8)                      | 0.373   |

|                                                                   |             |            |       |
|-------------------------------------------------------------------|-------------|------------|-------|
| Radiation to the shoulder blades *** (n=1,519)                    | 326 (30.5)  | 136 (30.2) | 0.924 |
| Radiation to the jaws *** (n=1,984)                               | 124 (11.6)  | 41 (9.1)   | 0.156 |
| Sweating (n=1,758)                                                | 559 (40.9)  | 259 (42.0) | 0.638 |
| Nausea or vomiting (n=1,474)                                      | 489 (49.5)  | 229 (47.1) | 0.381 |
| Pallor or ashen skin (n=1,007)                                    | 322 (47.8)  | 136 (40.8) | 0.038 |
| (Near) fainting (n=2,855)                                         | 143 (7.4)   | 72 (7.8)   | 0.678 |
| Palpitations (n=501)                                              | 284 (80.7)  | 125 (83.9) | 0.396 |
| Patient recognizes symptoms from previous cardiac event (n=1,298) | 250 (27.3)  | 102 (26.7) | 0.819 |
| <b>Urgency allocation</b>                                         |             |            |       |
| High urgency (U1 or U2) (n=3,204)                                 | 1496 (68.2) | 661 (65.3) | 0.100 |
| U1                                                                | 974 (44.5)  | 390 (38.6) |       |
| U2                                                                | 522 (23.8)  | 271 (26.8) |       |
| Low urgency (U3 or U4 or U5)                                      | 696 (31.8)  | 351 (34.7) |       |

**Appendix - Table 6. Base model with age and sex for predicting the diagnosis ACS.**

| Predictors                                                  | Regression coefficients (standard error) |
|-------------------------------------------------------------|------------------------------------------|
| Intercept                                                   | - 14.671 (3.442)                         |
| Age                                                         | 0.289 (0.079)                            |
| Age'                                                        | - 0.379 (0.123)                          |
| Age''                                                       | 1.017 (0.386)                            |
| Female sex                                                  | 2.155 (5.385)                            |
| Age * Female sex                                            | - 0.084 (0.123)                          |
| Age' * Female sex                                           | 0.175 (0.190)                            |
| Age'' * Female sex                                          | - 0.532 (0.589)                          |
| Apparent c-statistic 0.72 (95% CI 0.70-0.75)                |                                          |
| Adjusted c-statistic 0.72 (95% CI 0.68-0.75)                |                                          |
| Calibration slope 0.977 (95% CI 0.617-1.338)                |                                          |
| Calibration 0.016 (95% CI -0.702-0.734)                     |                                          |
| R <sup>2</sup> 0.065                                        |                                          |
| Knots for cubic spline functions placed at 5, 35, 65 and 95 |                                          |

**Appendix - Table 7. Full model including all candidate predictors for predicting the diagnosis ACS**

| Predictors                                                  | Regression coefficients (standard error) |
|-------------------------------------------------------------|------------------------------------------|
| Intercept                                                   | -15.914 (3.55)                           |
| Age                                                         | 0.288 (0.081)                            |
| Age'                                                        | -0.388 (0.126)                           |
| Age''                                                       | 1.058 (0.396)                            |
| Female gender                                               | 2.459 (5.519)                            |
| Age * Female sex                                            | -0.094 (0.126)                           |
| Age' * Female sex                                           | 0.187 (0.195)                            |
| Age'' * Female sex                                          | -0.554 (0.606)                           |
| Chest pain                                                  | -0.064 (0.365)                           |
| Acute chest pain (< 12 hours)                               | 0.258 (0.200)                            |
| Shortness of breath                                         | -0.141 (0.200)                           |
| Sweating                                                    | 0.459 (0.183)                            |
| Retrosternal located pain                                   | 0.178 (0.177)                            |
| Radiation of chest pain                                     | 0.617 (0.180)                            |
| Pressing heavy feeling                                      | 0.619 (0.272)                            |
| Stabbing pain                                               | -0.200 (0.353)                           |
| History of cardiovascular disease*                          | -0.039 (0.247)                           |
| History of coronary artery disease                          | 0.108 (0.234)                            |
| Someone else calls instead of the patient                   | 0.197 (0.160)                            |
| Patient calls during the night (0am-9am)                    | 0.495 (0.152)                            |
| Apparent c-statistic 0.79 (95% CI 0.76-0.81)                |                                          |
| Adjusted c-statistic 0.77 (95% CI 0.74-0.80)                |                                          |
| Calibration slope 0.818 (95% CI 0.650-0.986)                |                                          |
| Calibration -0.238 (-0.621-0.145)                           |                                          |
| R <sup>2</sup> 0.107                                        |                                          |
| Knots for cubic spline functions placed at 5, 35, 65 and 95 |                                          |

Appendix – Figure 1. Calibration of full model with internal external validation

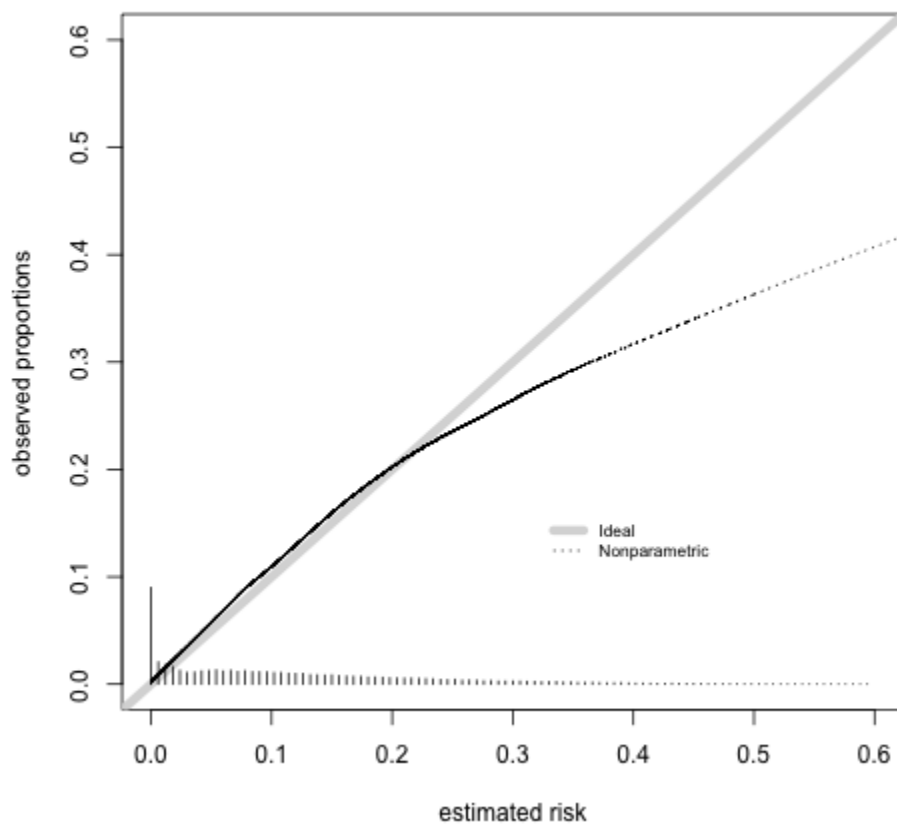

w only



## TRIPOD Checklist: Prediction Model Development and Validation

| Section/Topic                | Item | Checklist Item | Page                                                                                                                                                                                                  |           |
|------------------------------|------|----------------|-------------------------------------------------------------------------------------------------------------------------------------------------------------------------------------------------------|-----------|
| <b>Title and abstract</b>    |      |                |                                                                                                                                                                                                       |           |
| Title                        | 1    | D;V            | Identify the study as developing and/or validating a multivariable prediction model, the target population, and the outcome to be predicted.                                                          | 1         |
| Abstract                     | 2    | D;V            | Provide a summary of objectives, study design, setting, participants, sample size, predictors, outcome, statistical analysis, results, and conclusions.                                               | 2         |
| <b>Introduction</b>          |      |                |                                                                                                                                                                                                       |           |
| Background and objectives    | 3a   | D;V            | Explain the medical context (including whether diagnostic or prognostic) and rationale for developing or validating the multivariable prediction model, including references to existing models.      | 4,5       |
|                              | 3b   | D;V            | Specify the objectives, including whether the study describes the development or validation of the model or both.                                                                                     | 5         |
| <b>Methods</b>               |      |                |                                                                                                                                                                                                       |           |
| Source of data               | 4a   | D;V            | Describe the study design or source of data (e.g., randomized trial, cohort, or registry data), separately for the development and validation data sets, if applicable.                               | 5         |
|                              | 4b   | D;V            | Specify the key study dates, including start of accrual; end of accrual; and, if applicable, end of follow-up.                                                                                        | 5         |
| Participants                 | 5a   | D;V            | Specify key elements of the study setting (e.g., primary care, secondary care, general population) including number and location of centres.                                                          | 5         |
|                              | 5b   | D;V            | Describe eligibility criteria for participants.                                                                                                                                                       | 5,6       |
|                              | 5c   | D;V            | Give details of treatments received, if relevant.                                                                                                                                                     | n.a.      |
| Outcome                      | 6a   | D;V            | Clearly define the outcome that is predicted by the prediction model, including how and when assessed.                                                                                                | 6         |
|                              | 6b   | D;V            | Report any actions to blind assessment of the outcome to be predicted.                                                                                                                                | 6         |
| Predictors                   | 7a   | D;V            | Clearly define all predictors used in developing or validating the multivariable prediction model, including how and when they were measured.                                                         | 6         |
|                              | 7b   | D;V            | Report any actions to blind assessment of predictors for the outcome and other predictors.                                                                                                            | 6         |
| Sample size                  | 8    | D;V            | Explain how the study size was arrived at.                                                                                                                                                            | 6         |
| Missing data                 | 9    | D;V            | Describe how missing data were handled (e.g., complete-case analysis, single imputation, multiple imputation) with details of any imputation method.                                                  | 7         |
| Statistical analysis methods | 10a  | D              | Describe how predictors were handled in the analyses.                                                                                                                                                 | 7         |
|                              | 10b  | D              | Specify type of model, all model-building procedures (including any predictor selection), and method for internal validation.                                                                         | 7         |
|                              | 10c  | V              | For validation, describe how the predictions were calculated.                                                                                                                                         | 7         |
|                              | 10d  | D;V            | Specify all measures used to assess model performance and, if relevant, to compare multiple models.                                                                                                   | 7         |
|                              | 10e  | V              | Describe any model updating (e.g., recalibration) arising from the validation, if done.                                                                                                               | n.a.      |
| Risk groups                  | 11   | D;V            | Provide details on how risk groups were created, if done.                                                                                                                                             | n.a.      |
| Development vs. validation   | 12   | V              | For validation, identify any differences from the development data in setting, eligibility criteria, outcome, and predictors.                                                                         | 7, suppl  |
| <b>Results</b>               |      |                |                                                                                                                                                                                                       |           |
| Participants                 | 13a  | D;V            | Describe the flow of participants through the study, including the number of participants with and without the outcome and, if applicable, a summary of the follow-up time. A diagram may be helpful. | 5         |
|                              | 13b  | D;V            | Describe the characteristics of the participants (basic demographics, clinical features, available predictors), including the number of participants with missing data for predictors and outcome.    | 8,9,10    |
|                              | 13c  | V              | For validation, show a comparison with the development data of the distribution of important variables (demographics, predictors and outcome).                                                        | suppl     |
| Model development            | 14a  | D              | Specify the number of participants and outcome events in each analysis.                                                                                                                               | 8         |
|                              | 14b  | D              | If done, report the unadjusted association between each candidate predictor and outcome.                                                                                                              | 11,12     |
| Model specification          | 15a  | D              | Present the full prediction model to allow predictions for individuals (i.e., all regression coefficients, and model intercept or baseline survival at a given time point).                           | 12, suppl |
|                              | 15b  | D              | Explain how to use the prediction model.                                                                                                                                                              | 13        |
| Model performance            | 16   | D;V            | Report performance measures (with CIs) for the prediction model.                                                                                                                                      | 12, 13    |
| Model-updating               | 17   | V              | If done, report the results from any model updating (i.e., model specification, model performance).                                                                                                   | 12,13     |
| <b>Discussion</b>            |      |                |                                                                                                                                                                                                       |           |
| Limitations                  | 18   | D;V            | Discuss any limitations of the study (such as nonrepresentative sample, few events per predictor, missing data).                                                                                      | 14        |
| Interpretation               | 19a  | V              | For validation, discuss the results with reference to performance in the development data, and any other validation data.                                                                             | 14, 15    |
|                              | 19b  | D;V            | Give an overall interpretation of the results, considering objectives, limitations, results from similar studies, and other relevant evidence.                                                        | 15        |
| Implications                 | 20   | D;V            | Discuss the potential clinical use of the model and implications for future research.                                                                                                                 | 16        |
| <b>Other information</b>     |      |                |                                                                                                                                                                                                       |           |
| Supplementary information    | 21   | D;V            | Provide information about the availability of supplementary resources, such as study protocol, Web calculator, and data sets.                                                                         | 17        |
| Funding                      | 22   | D;V            | Give the source of funding and the role of the funders for the present study.                                                                                                                         | 17        |

\*Items relevant only to the development of a prediction model are denoted by D, items relating solely to a validation of a prediction model are denoted by V, and items relating to both are denoted D;V. We recommend using the TRIPOD Checklist in conjunction with the TRIPOD Explanation and Elaboration document.

# BMJ Open

## Development and validation of a prediction rule for patients suspected of acute coronary syndrome in primary care: a cross-sectional study

|                                 |                                                                                                                                                                                                                                                                                                                                                                                                                                                                                                                                                                                                                                                                                                                                                                                                                                                                                                           |
|---------------------------------|-----------------------------------------------------------------------------------------------------------------------------------------------------------------------------------------------------------------------------------------------------------------------------------------------------------------------------------------------------------------------------------------------------------------------------------------------------------------------------------------------------------------------------------------------------------------------------------------------------------------------------------------------------------------------------------------------------------------------------------------------------------------------------------------------------------------------------------------------------------------------------------------------------------|
| Journal:                        | <i>BMJ Open</i>                                                                                                                                                                                                                                                                                                                                                                                                                                                                                                                                                                                                                                                                                                                                                                                                                                                                                           |
| Manuscript ID                   | bmjopen-2022-064402.R2                                                                                                                                                                                                                                                                                                                                                                                                                                                                                                                                                                                                                                                                                                                                                                                                                                                                                    |
| Article Type:                   | Original research                                                                                                                                                                                                                                                                                                                                                                                                                                                                                                                                                                                                                                                                                                                                                                                                                                                                                         |
| Date Submitted by the Author:   | 20-Aug-2022                                                                                                                                                                                                                                                                                                                                                                                                                                                                                                                                                                                                                                                                                                                                                                                                                                                                                               |
| Complete List of Authors:       | Wouters, Loes; Julius Center for Health Sciences and Primary Care, General Practice<br>Zwart, D.L; Julius Center for Health Sciences and Primary Care, General Practice<br>Erkelens, Daphne; Julius Center for Health Sciences and Primary Care, General practice<br>Adriaansen, Elisabeth; Julius Center for Health Sciences and Primary Care, General Practice<br>den Ruijter, Hester; Utrecht University, Experimental Cardiology<br>De Groot, Esther; Utrecht University, Julius Center for health sciences and primary care<br>Damoiseaux, Roger; Julius Center for Health Sciences and Primary Care, General practice<br>Hoes, Arno; Julius Center for Health Sciences and Primary Care, General practice<br>van Smeden, Maarten; Julius Center for Health Sciences and Primary Care, Methodology department<br>Rutten, Frans; Julius Center for Health Sciences and Primary Care, General Practice |
| <b>Primary Subject Heading</b>: | General practice / Family practice                                                                                                                                                                                                                                                                                                                                                                                                                                                                                                                                                                                                                                                                                                                                                                                                                                                                        |
| Secondary Subject Heading:      | Emergency medicine, Cardiovascular medicine                                                                                                                                                                                                                                                                                                                                                                                                                                                                                                                                                                                                                                                                                                                                                                                                                                                               |
| Keywords:                       | PRIMARY CARE, Myocardial infarction < CARDIOLOGY, Telemedicine < BIOTECHNOLOGY & BIOINFORMATICS                                                                                                                                                                                                                                                                                                                                                                                                                                                                                                                                                                                                                                                                                                                                                                                                           |
|                                 |                                                                                                                                                                                                                                                                                                                                                                                                                                                                                                                                                                                                                                                                                                                                                                                                                                                                                                           |

SCHOLARONE™  
Manuscripts



I, the Submitting Author has the right to grant and does grant on behalf of all authors of the Work (as defined in the below author licence), an exclusive licence and/or a non-exclusive licence for contributions from authors who are: i) UK Crown employees; ii) where BMJ has agreed a CC-BY licence shall apply, and/or iii) in accordance with the terms applicable for US Federal Government officers or employees acting as part of their official duties; on a worldwide, perpetual, irrevocable, royalty-free basis to BMJ Publishing Group Ltd ("BMJ") its licensees and where the relevant Journal is co-owned by BMJ to the co-owners of the Journal, to publish the Work in this journal and any other BMJ products and to exploit all rights, as set out in our [licence](#).

The Submitting Author accepts and understands that any supply made under these terms is made by BMJ to the Submitting Author unless you are acting as an employee on behalf of your employer or a postgraduate student of an affiliated institution which is paying any applicable article publishing charge ("APC") for Open Access articles. Where the Submitting Author wishes to make the Work available on an Open Access basis (and intends to pay the relevant APC), the terms of reuse of such Open Access shall be governed by a Creative Commons licence – details of these licences and which [Creative Commons](#) licence will apply to this Work are set out in our licence referred to above.

Other than as permitted in any relevant BMJ Author's Self Archiving Policies, I confirm this Work has not been accepted for publication elsewhere, is not being considered for publication elsewhere and does not duplicate material already published. I confirm all authors consent to publication of this Work and authorise the granting of this licence.

1  
2  
3 **Development and validation of a prediction rule for patients suspected of acute coronary syndrome in**  
4 **primary care: a cross-sectional study**  
5  
6  
7

8 **Wouters LTCM<sup>1</sup>, Zwart DLM<sup>1</sup>, Erkelens DCA<sup>1</sup>, Adriaansen EJM<sup>1</sup>, Den Ruijter HM<sup>2</sup>, de Groot E<sup>1</sup>,**  
9 **Damoiseaux RAMJ<sup>1</sup>, Hoes AW<sup>1,3</sup>, van Smeden M<sup>3</sup>, Rutten FH<sup>1</sup>**  
10  
11  
12

- 13 1. Dept. General Practice, Julius Centre for Health Sciences and Primary Care, University Medical  
14 Centre Utrecht, Utrecht University, Utrecht, the Netherlands  
15  
16 2. Laboratory of Exp. Cardiology, University Medical Centre Utrecht, Utrecht University, Utrecht, the  
17 Netherlands  
18  
19 3. Dept. Epidemiology, Julius Centre for Health Sciences and Primary Care, University Medical Centre,  
20 Utrecht University, Utrecht, the Netherlands  
21  
22  
23  
24  
25  
26

27 **Corresponding author:** L.T. Wouters, MD, PhD

28 Dept. General Practice, Julius Centre for Health Sciences and Primary Care, University Medical Centre  
29 Utrecht, Utrecht University, STR 6.131, PO Box 85500, 3508 GA Utrecht, The Netherlands

30  
31 Phone number: +31 (0)88 75 51470

32  
33 Email: [L.T.C.Wouters-2@umcutrecht.nl](mailto:L.T.C.Wouters-2@umcutrecht.nl)  
34  
35  
36

37 **Word count: 4024**

38 **Abstract count: 249**  
39  
40  
41  
42  
43  
44  
45  
46  
47  
48  
49  
50  
51  
52  
53  
54  
55  
56  
57  
58  
59  
60

## Abstract

**Objective** To develop and validate a symptom-based prediction rule for early recognition of acute coronary syndrome (ACS) in patients with acute chest discomfort who call out-of-hours services for primary care (OHS-PC).

**Design** Cross-sectional study. A diagnostic prediction rule was developed with multivariable regression analyses. All models were validated with internal-external cross validation within seven OHS-PC locations. Both age and sex were analysed as statistical interaction terms, applying for age non-linear effects.

**Setting** Seven OHS-PC in the Netherlands.

**Participants** 2,192 patients who called OHS-PC for acute chest discomfort (pain, pressure, tightness, or discomfort) between 2014 and 2017. Backed up recordings of telephone triage conversations were analysed.

**Primary and secondary outcomes measures** Diagnosis of ACS retrieved from the patient's medical records in general practice, including hospital specialists discharge letters. Performance of the prediction rules was calculated with the c-statistic and the final model was chosen based on net benefit analyses.

**Results** Among the 2,192 patients who called the OHS-PC with acute chest discomfort, 8.3% females and 15.3% males had an ACS. The final diagnostic model included seven predictors (sex, age, acute onset of chest pain lasting less than 12 hours, a pressing/heavy character of the pain, radiation of the pain, sweating, and calling at night). It had an adjusted c-statistic of 0.77 (95% CI 0.74-0.79) with good calibration.

**Conclusion** The final prediction model for ACS has good discrimination and calibration and shows promise for replacing the existing telephone triage rules for patients with acute chest discomfort in general practice and OHS-PC.

**Trial registration** NTR7331

**Key words:** prediction rules, acute coronary syndrome, sex, symptoms, general practice, out-of-hours primary care

### Strengths and limitations of this study

- We could analyse the original and very first telephone conversation of patients with acute chest discomfort.
- The developed prediction model can be well generalized to other OHS-PC locations in the Netherlands, but also to similar OHS-PC settings in other countries or even emergency medical service settings.
- A limitation is that a full external validation of the model in another OHS-PC was impossible because no other cohort similar to ours was available.
- Another limitation is that the effects of the predictors were assumed to be similar for males and females while this is not exactly the case, but by incorporating a differential non-linear effect of age and interaction with sex in the analyses this effect is minimized.

## Introduction

Chest discomfort is among the top five reasons for telephone contact in out-of-hours services for primary care (OHS-PC) and concerns 5% of all cases at the emergency department (ED) in the USA.<sup>1</sup> In the Netherlands, around 80% of patients with chest discomfort first call the general practitioner (GP) or OHS-PC, while 20% directly calls the emergency medical service (EMS, or ambulance dispatch centre) or are self-referrals to the ED.<sup>2</sup> Adequate triage and early diagnosis in these patients is vital, because in case of an underlying acute coronary syndrome (ACS) early effective therapeutic interventions ('time is muscle') improve the patient's outcome and prognosis.<sup>3</sup> For the diagnosis of ACS, a 12-lead electrocardiogram (ECG) and troponin testing is needed.<sup>3</sup> However, before the patient is referred to an ED where these diagnostic tests can be done, patient selection is necessary based on symptom presentation retrieved by telephone triage.<sup>4,5</sup> Symptom-based differentiation of ACS from other causes of chest discomfort is notoriously difficult.<sup>6</sup> Symptom-based prediction rules for diagnosing ACS in general practice and other prehospital settings are -although highly needed- scarce.<sup>7-9</sup> The efficiency and safety of telephone triage in OHS-PC was poor in a population with a prior chance of ACS of 8.3% in females and 15.3% in males; almost 50% of the males and females with chest discomfort received a high priority ambulance, while 11% diagnosed with an ACS did not received a high urgency (i.e., was seen within one hour).<sup>10</sup>

Most prediction rules for diagnosing ACS were developed in the ED setting and include results from ECG and troponin testing.<sup>11</sup> Such prediction rules cannot be straightforward implemented for telephone triage in general practice because (i) in the latter setting these diagnostic tests are not available, (ii) the prior chance of ACS is rather low, and (iii) on average disease severity is less than in those seen in the ED.<sup>12,13</sup> The prevalence of ACS among patients with chest discomfort who call OHS-PC or EMS is about 10-15%, and among those seen at the ED between 10 to 30%.<sup>10,11,13,14</sup> Only one prediction rule was developed in primary care for diagnosing ACS; the modified Grijseels prediction rule, which had moderate discriminative ability (c-statistic of 0.66) after external validation.<sup>7,8</sup> Five other primary care prediction rules were developed to predict CAD; e.g. the Marburg Heart Score (MHS) and INTERCHEST prediction rule (International Working Group on Chest Pain in Primary Care).<sup>9</sup> In these studies both patients with acute and non-acute chest discomfort were included and the prevalence of stable CAD showed to be 10.9% to 12.6%, while that of ACS was only 1.5% to 2.5%.<sup>9</sup> Thus, these prediction rules have limited applicability for specifically diagnosing ACS.

1  
2  
3 In most OHS-PC and about half of the EMS in the Netherlands, triage nurses use the semi-automatic  
4 'Netherlands Triage Standard' (NTS) as a decision support tool to classify the urgency of the patient's  
5 condition. Triage nurses have to choose one out of 56 'main complaints' and based on answers linked to  
6 the triage criteria, the NTS automatically proposes one out of six levels of urgency, that is, a certain time  
7 frame in which patients should be seen (U0-U5, appendix- table 1). The NTS is a modified and shortened  
8 version of the Manchester Triage Standard which was developed in the ED setting.<sup>15</sup> Although the NTS  
9 was explicitly developed for telephone triage, it has not yet been validated against clinical outcomes  
10 even though it is already implemented on large scale. Recent research showed that the NTS had a poor  
11 sensitivity of 0.73 (95% CI 0.68-0.78) for telephone triage of patients with acute chest discomfort. The  
12 NTS recommended a low urgency (U3, U4 or U5) to 27% of patients who eventually showed to have an  
13 ACS or other life threatening event (LTE).<sup>10</sup> The NTS' specificity was also poor with 0.43 (95% CI 0.40-  
14 0.45); the NTS recommended a high urgency to 57% of the patients who eventually showed not to have  
15 an ACS or LTE. Given this poor safety and efficiency of the NTS, there is an urgent need for a better  
16 prediction model for patients with acute chest discomfort calling OHS-PC. In addition, there is a need for  
17 exploring sex-specificity of such a prediction rule as there is an ongoing debate on whether females  
18 differ from males in reporting symptoms of ACS.<sup>16 17</sup>

19  
20  
21  
22  
23  
24  
25  
26  
27  
28  
29  
30  
31  
32 The aim of this study was to develop, and internal-external cross validate a symptom-based prediction  
33 rule for diagnosing ACS which is considerate to sex categories in male and female patients who call the  
34 OHS-PC for acute chest discomfort.

### 35 36 37 38 **Methods**

39  
40 We performed a cross-sectional study among 2,192 patients who called one out of seven participating  
41 OHS-PC in the Netherlands because of acute chest discomfort (pain, pressure, tightness, or discomfort)  
42 during the period 2014 to 2017.<sup>18</sup> These OHS-PC serve a total population of 1.5 million people and cover  
43 around 300,000 calls a year. We first selected calls based on of the International Code for Primary Care  
44 (ICPC; a WHO world-wide code system for primary care) with ICPC-codes K01, K02, K03, K24, K74, K75,  
45 K76, K77, K93, L04, P74, R02, R98 and calls with keywords thoracic pain, chest pain, myocardial  
46 infarction, heart attack and their common abbreviations (Figure 1). We included a broad variety of  
47 symptoms to capture the entire domain of patients that could be suspected of ACS. We listed all  
48 available calls of these patients and assigned random numbers with the Random Number Generator  
49 (RAND) function in Microsoft Excel to retrieve a random sample. Calls were excluded before re-listening



1  
2  
3 when the patients' age was below 18 years or when the patient did not live in the surrounding area of  
4 the OHS-PC (in which case we could not retrieve the final diagnosis from the patient's own general  
5 practitioner). Calls were excluded during re-listening when it did not concern a triage call (e.g. inter-  
6 collegial consultation) or when the recording was of poor quality (Figure 1).  
7  
8  
9

### 10 11 *Candidate predictors*

12 Research team members (LW, DE) and medical students listened to the call recordings, blinded for the  
13 outcome, to collect data about symptoms, medical history and urgency allocation. Patient (age, sex) and  
14 call characteristics (call time, call duration) were collected from the OHS-PC electronic medical files of  
15 the patients. As candidate predictors we included age and sex, the NTS triage criteria (see appendix-  
16 table 2), the ACS predictors from the modified Grijseels prediction model (male sex, radiation, nausea,  
17 sweating and history of CAD), the 'CAD predictors' from MHS and INTERCHEST prediction models (age,  
18 pain feels like pressure, CAD history or CV risk factors, patient assumes cardiac origin of pain), and -  
19 based on a recent own study in OHS-PC- the predictor 'calling at night between 0am and 9am'.<sup>7-9 19</sup>  
20  
21  
22  
23  
24  
25  
26  
27

### 28 *Outcome*

29 The primary outcome was the diagnosis ACS. The final diagnoses were retrieved from the patient's GP  
30 and based on the GP's electronic medical files which include ED and cardiologist discharge letters and  
31 notes from the OHS-PC contact. The diagnosis ACS was nearly always made by a cardiologist (96.0%) and  
32 included information on levels of (high-sensitivity) troponin and electrocardiographic results. We used  
33 medical information up to 30-days following the contact with the OHS-PC to allow us to include  
34 diagnoses of ACS that were initially missed because the patient was not referred to the cardiologist the  
35 same day of the OHS-PC contact. However, in none of the patients in the study we had evidence of a  
36 missed diagnosis of ACS.  
37  
38  
39  
40  
41  
42  
43  
44

### 45 *Sample size calculation*

46 We relied on the minimal sample size criteria for prediction model development proposed by Riley et al,  
47 using the 'pmsampsize' package in R.<sup>20</sup> Based on an ACS prevalence of overall 11% and an Cox-Snell R-  
48 squared of 0.075 (a conservative value based on a model with age and sex) and a total number of 2,192  
49 observations we were allowed to assess 19 candidate predictors.<sup>21</sup> Based on sample size calculations we  
50 concluded that development of separate models for males and females would require a significantly  
51 larger sample, therefore we analysed sex as a statistical interaction term.<sup>20</sup>  
52  
53  
54  
55  
56  
57  
58  
59  
60

### *Statistical analyses*

We developed three diagnostic models using multivariable logistic regression analysis. First, we developed a base model with only age and sex as predictors, where age was modelled using a restricted cubic spline function (4 knots) and an interaction with sex. This resulted in a base model with 7 predictor parameters (excluding the intercept). Second, we fitted a full model with an additional 12 pre-selected binary predictors (having chest pain, acute chest pain shorter than 12 hours, shortness of breath, sweating, retrosternal located chest pain, radiation, pressing heavy pain, stabbing pain, history of CVD, history of CAD, someone else calling, calling at night). Thirdly, we applied backward elimination, with a cut-off p-value  $< 0.20$  for including predictors (a higher cut-off value to lower the chances of overfitting).<sup>21</sup>

We applied internal-external cross validation (IECV) for model validation using the seven different OHS-PC locations (Appendix-Table 3 for patient characteristics of different OHS-PC locations).<sup>22</sup> We evaluated the IECV performance in terms of the area under the ROC curve (c-statistic), the calibration slope and calibration in the large. The IECV estimates of performance were combined by using random-effect model (DerSimonian-Laird estimator). Based on the IECV we also constructed flexible calibration curves and decision curves. In the decision curve analyses we compared the final model with the currently used NTS triage model in OHS-PC in the Netherlands.<sup>23</sup> Finally, we created an illustrative table of diagnostic test accuracy for various model-based risk thresholds of the final model, following the example in Wynants et al.<sup>23</sup> IECV estimates for risk threshold specific sensitivity and specificity, and we applied a bivariate model commonly used for diagnostic test accuracy meta-analysis.<sup>24</sup>

### *Missing data*

For missing data we carried out multiple imputation using the Multivariate Imputation via Chained Equation (MICE) package in R, with 30 imputation rounds and 30 iterations.<sup>25</sup> We pooled the results following Rubin's rules.<sup>26</sup> Predictors with over 50% missing were excluded from consideration in the models (Appendix-table 4 for details about the missing data). Characteristics were compared between patients with and without information on the medical outcome - because some GPs refused diagnosis retrieval from their files - to allow for assessment of differences in characteristics between these patient groups (Appendix-table 5). There were no clinically meaningful differences in symptoms and patient or call characteristics between the 2,192 patients with information on the outcome, and the 1,012 patients

about whom knowledge of the medical outcome related to the OHS-PC contact because of acute chest discomfort was missing.

All analyses were done in R version 4.0.3. (2020-10-10) with the Regression Modelling Strategies ('rms') package in R.<sup>27</sup> We reported our study in accordance to the Transparent Reporting of a multivariable prediction rules for Individual Prognosis Or Diagnosis (TRIPOD) criteria (Supplementary file).<sup>28</sup>

### *Patient and Public Involvement*

No patients were involved in defining the research question or the outcome measures. Neither they were involved in developing plans for design. However, they participated in the discussion on implications and the implementation strategy. In addition, they were asked to advise on interpretation and writing up of the results. Results will be shared and discussed in more detail with representatives of the Dutch national patient community of cardiovascular diseases ('Harteraad').

### **Results**

Among the 2,192 callers with acute chest discomfort (mean age 59.1 (SD 19.5) years and 55.3% females) 251 (11.5%) had a final diagnosis of ACS; 101 (8.3%) females and 150 (15.3%) males (Table 1). Patients with ACS were older than those without (mean age 69.7 (SD 13.4) vs. 57.7 (SD 19.8) years) and females with ACS were on average older than men with ACS (73.8 (SD 13.5) years vs. 67.0 (SD 12.6) years).

**Table 1. Characteristics of 2,192 patients who called OHS PC with acute chest discomfort between 2014-2017, divided between females and males with and without ACS.**

| Characteristics                               | 1,213 females (55.3%) |                        | 979 males (44.7%) |                       |
|-----------------------------------------------|-----------------------|------------------------|-------------------|-----------------------|
|                                               | ACS n=101 (8.3%)      | No ACS n=1,112 (91.7%) | ACS n=150 (15.3%) | No ACS n= 829 (84.7%) |
| <b>Patient characteristics</b>                |                       |                        |                   |                       |
| Mean age in years (SD) (n=2,192)              | 73.8 (13.5)           | 58.0 (20.2)            | 67.0 (12.6)       | 57.2 (19.2)           |
| <b>Call characteristics</b>                   |                       |                        |                   |                       |
| Median call duration in min (IQR) (n=2,192)   | 5:27 (3:57-8:24)      | 6:59 (5:06-9:47)       | 6:04 (4:03-8:17)  | 6:56 (5:10-9:23)      |
| Mean introduction time in min (IQR) (n=2,192) | 0:13 (0:09-0:18)      | 0:17 (0:11-0:26)       | 0:14 (0:09-0:21)  | 0:17 (0:11-0:25)      |
| Call during the night (0am-9am) (n=2,192)     | 34 (33.7)             | 304 (27.3)             | 62 (41.3)         | 188 (22.7)            |

1  
2  
3  
4  
5  
6  
7  
8  
9  
10  
11  
12  
13  
14  
15  
16  
17  
18  
19  
20  
21  
22  
23  
24  
25  
26  
27  
28  
29  
30  
31  
32  
33  
34  
35  
36  
37  
38  
39  
40  
41  
42  
43  
44  
45  
46  
47  
48  
49  
50  
51  
52  
53  
54  
55  
56  
57  
58  
59  
60

|                                                                 |            |             |            |            |
|-----------------------------------------------------------------|------------|-------------|------------|------------|
| Triage nurse consulted the GP (n=2,192)                         | 43 (42.6)  | 580 (52.2)  | 75 (50.0)  | 449 (54.2) |
| Someone else called on behalf of patient (n=2,192)              | 69 (68.3)  | 515 (46.3)  | 98 (65.3)  | 432 (52.1) |
| The person who calls expressed concerns (n=988)                 | 42 (95.5)  | 507 (90.5)  | 61 (96.8)  | 378 (87.1) |
| <b>Medical history and risk factors</b>                         |            |             |            |            |
| Cardiovascular disease or CV risk factors (n=1,844)             | 70 (81.4)  | 552 (61.1)  | 106 (78.5) | 464 (64.4) |
| History of coronary artery disease (n=1,151)                    | 23 (47.9)  | 131 (24.2)  | 54 (56.3)  | 181 (38.8) |
| Diabetes (n=893)                                                | 14 (42.4)  | 66 (14.3)   | 22 (39.3)  | 78 (22.0)  |
| Hypertension (n=894)                                            | 26 (72.2)  | 162 (34.0)  | 22 (51.2)  | 113 (33.3) |
| Hypercholesterolemia/statin use (n=826)                         | 10 (40.0)  | 96 (22.6)   | 27 (50.0)  | 79 (24.5)  |
| Cardiac arrhythmia (n=905)                                      | 4 (14.8)   | 125 (26.2)  | 12 (25.0)  | 89 (25.2)  |
| <b>Symptoms</b>                                                 |            |             |            |            |
| Chest pain (n=2,116)                                            | 95 (96.9)  | 1007 (94.1) | 139 (93.3) | 758 (94.9) |
| Shortness of breath (n=1,696)                                   | 57 (71.3)  | 559 (65.4)  | 63 (61.2)  | 415 (63.1) |
| Chest pain duration <12 hours (n=1,910)                         | 74 (86.0)  | 703 (72.3)  | 113 (82.5) | 510 (71.3) |
| Severe pain (NRS >7, range 1-10) (n=917)                        | 19 (61.3)  | 184 (39.6)  | 18 (25.4)  | 116 (33.0) |
| Pressing/heavy chest pain* (n=1,625)                            | 58 (81.7)  | 525 (62.5)  | 95 (81.2)  | 345 (57.7) |
| Stabbing chest pain* (n=1,625)                                  | 8 (11.3)   | 190 (22.6)  | 9 (7.7)    | 159 (26.6) |
| Retrosternal chest pain ** (n=1,565)                            | 36 (54.5)  | 326 (40.0)  | 52 (53.1)  | 227 (38.7) |
| Chest pain left or right of thorax** (n=1,566)                  | 19 (28.8)  | 318 (39.0)  | 28 (28.6)  | 262 (44.6) |
| Radiation of chest pain to any location (n=1,678)               | 74 (86.0)  | 575 (67.8)  | 83 (65.4)  | 347 (56.2) |
| Radiation to the arm *** (n=1,677)                              | 37 (43.0)  | 218 (25.7)  | 54 (42.5)  | 143 (23.2) |
| Radiation to the shoulder blades *** (n=1,678)                  | 14 (16.3)  | 190 (22.4)  | 19 (15.0)  | 103 (16.7) |
| Radiation to the jaws *** (n=1,678)                             | 10 (11.6)  | 77 (9.1)    | 4 (3.1)    | 33 (5.3)   |
| Sweating (n=1,366)                                              | 36 (52.9)  | 279 (42.0)  | 54 (51.9)  | 190 (35.8) |
| Nausea or vomiting (n=987)                                      | 24 (52.2)  | 295 (56.6)  | 31 (43.1)  | 139 (39.9) |
| Pallor or ashen skin (n=673)                                    | 22 (59.5)  | 139 (44.3)  | 36 (64.3)  | 125 (46.8) |
| (Near) fainting (n=1,951)                                       | 8 (9.5)    | 76 (7.7)    | 9 (6.7)    | 50 (6.7)   |
| Palpitations (n=162)                                            | 10 (100.0) | 183 (84.7)  | 8 (50.0)   | 83 (75.5)  |
| Patient recognizes symptoms from previous cardiac event (n=915) | 17 (35.4)  | 100 (22.0)  | 30 (46.9)  | 103 (29.5) |
| <b>Urgency allocation</b>                                       |            |             |            |            |

1  
2  
3  
4  
5  
6  
7  
8  
9

|                                   |           |            |            |            |
|-----------------------------------|-----------|------------|------------|------------|
| High urgency (U1 or U2) (n=2,192) | 89 (88.1) | 740 (66.5) | 133 (88.7) | 534 (64.4) |
| U1                                | 75 (74.3) | 443 (39.8) | 106 (70.7) | 350 (42.2) |
| U2                                | 14 (13.9) | 297 (26.7) | 27 (18.0)  | 184 (22.2) |
| Low urgency (U3 or U4 or U5)      | 12 (11.9) | 372 (33.5) | 17 (11.3)  | 295 (35.6) |

10 \*Pain described by patient. Pressing heavy pain: pressing, heavy or tightening pain vs. other types of pain (stabbing, burning, cramping,  
 11 tearing) Stabbing pain: stabbing vs. other types of pain (pressing, heavy, tightening, burning, cramping)  
 12  
 13 \*\* Retrosternal location vs. other pain locations. Left or right side of the thorax vs. other pain locations  
 14 \*\*\* Radiation location vs. no radiation and radiation other pain  
 15

16  
17  
18  
19  
20  
21  
22  
23  
24  
25

Over two thirds of all callers (68.3%) received a high urgency allocation (seen within one hour; U1 or U2) and among the 251 patients who showed to have an ACS, 88.4% received a high urgency allocation. Calls of patients who had an ACS were shorter than calls in those without ACS (median call duration 6:34 (SD 3:38) vs. 7:42 (SD 3:48) minutes).

26  
27  
28  
29  
30  
31  
32  
33  
34  
35  
36  
37  
38  
39  
40  
41  
42  
43  
44

#### *Medical history and symptoms*

Females and males with ACS had more often a history with CVD or CV risk factors than those without (females with ACS 81.4% vs. females without ACS 61.1%, males with ACS 78.5% vs. males without ACS 64.4%) (Table 1). The majority of both females and males had chest pain (94.5%) and this was similar among those with and without ACS. Overall, presented symptoms among males and females calling the OHS-PC for chest discomfort were quite similar. Symptoms associated with ACS in both sexes were pressing/heavy chest pain (females with ACS 81.7% vs. females without ACS 62.5%, males 81.2% vs. 57.7% respectively), retrosternal located chest pain (females 54.5% vs. 40.0%, males 53.1% vs. 38.7%), radiation of pain (females 86.0% vs 67.8%, males 65.4% vs 56.2%), and sweating (females 52.9% vs. 42.0%, males 51.9% vs. 35.8%).

45  
46  
47  
48  
49  
50  
51  
52  
53  
54  
55  
56  
57  
58  
59

#### *Diagnoses*

In total 251 patients were diagnosed with ACS and 65 with other LTEs, and of clinical relevance is that both critical events occurred significantly more in males than females (15.3% vs. 8.3%,  $p < 0.001$  for ACS, and 3.8% vs. 2.3%,  $p = 0.04$  for other LTEs, respectively). Of the 101 females with ACS, 22.8% had a ST-segment elevation myocardial infarction (STEMI), 46.5% a non ST-segment elevation myocardial infarction (NSTEMI), 19.8% unstable angina pectoris (UAP), and 10.9% non-classified ACS. In 150 males with ACS, 33.3% had a STEMI, 36.7% a NSTEMI, 26.0% UAP, and 4.0% non-classified ACS (Table 2).

60

**Table 2. Diagnoses of 2,192 males and females who contacted the OHS-PC for acute chest discomfort between 2014-2017, by sex.**

| Diagnosis, n (%)                                                                                                                                                                                                                                                                                                                                                                                                                                                                                                                                                                                                                                                                                                                                                                                                                                                                                                                                                                                         | Females<br>n= 1213 | Males<br>n= 979 | p-value |
|----------------------------------------------------------------------------------------------------------------------------------------------------------------------------------------------------------------------------------------------------------------------------------------------------------------------------------------------------------------------------------------------------------------------------------------------------------------------------------------------------------------------------------------------------------------------------------------------------------------------------------------------------------------------------------------------------------------------------------------------------------------------------------------------------------------------------------------------------------------------------------------------------------------------------------------------------------------------------------------------------------|--------------------|-----------------|---------|
| <b>Acute coronary syndrome*</b>                                                                                                                                                                                                                                                                                                                                                                                                                                                                                                                                                                                                                                                                                                                                                                                                                                                                                                                                                                          | 101 (8.3)          | 150 (15.3)      | <0.001  |
| <b>STEMI</b>                                                                                                                                                                                                                                                                                                                                                                                                                                                                                                                                                                                                                                                                                                                                                                                                                                                                                                                                                                                             | 23 (22.8)          | 50 (33.3)       | 0.071   |
| <b>NSTEMI</b>                                                                                                                                                                                                                                                                                                                                                                                                                                                                                                                                                                                                                                                                                                                                                                                                                                                                                                                                                                                            | 47 (46.5)          | 55 (36.7)       | 0.119   |
| <b>UAP</b>                                                                                                                                                                                                                                                                                                                                                                                                                                                                                                                                                                                                                                                                                                                                                                                                                                                                                                                                                                                               | 20 (19.8)          | 39 (26.0)       | 0.256   |
| <b>Non-classified ACS</b>                                                                                                                                                                                                                                                                                                                                                                                                                                                                                                                                                                                                                                                                                                                                                                                                                                                                                                                                                                                | 11 (10.9)          | 6 (4.0)         | 0.033   |
| <b>Life threatening events (LTEs)</b>                                                                                                                                                                                                                                                                                                                                                                                                                                                                                                                                                                                                                                                                                                                                                                                                                                                                                                                                                                    | 28 (2.3)           | 37 (3.8)        | 0.043   |
| <b>Pulmonary embolism</b>                                                                                                                                                                                                                                                                                                                                                                                                                                                                                                                                                                                                                                                                                                                                                                                                                                                                                                                                                                                | 8 (28.6)           | 10 (27.0)       | 0.890   |
| <b>Acute abdominal aneurysm</b>                                                                                                                                                                                                                                                                                                                                                                                                                                                                                                                                                                                                                                                                                                                                                                                                                                                                                                                                                                          | 2 (7.1)            | 3 (8.1)         | 0.885   |
| <b>Thoracic aortic dissection</b>                                                                                                                                                                                                                                                                                                                                                                                                                                                                                                                                                                                                                                                                                                                                                                                                                                                                                                                                                                        | 1 (3.6)            | 4 (10.8)        | 0.278   |
| <b>Other**</b>                                                                                                                                                                                                                                                                                                                                                                                                                                                                                                                                                                                                                                                                                                                                                                                                                                                                                                                                                                                           | 17 (60.7)          | 20 (54.1)       | 0.591   |
| <b>Non-urgent cardiovascular diseases***</b>                                                                                                                                                                                                                                                                                                                                                                                                                                                                                                                                                                                                                                                                                                                                                                                                                                                                                                                                                             | 223 (18.4)         | 191 (19.5)      | 0.069   |
| <b>Musculoskeletal pain</b>                                                                                                                                                                                                                                                                                                                                                                                                                                                                                                                                                                                                                                                                                                                                                                                                                                                                                                                                                                              | 245 (20.2)         | 148 (15.2)      | 0.039   |
| <b>Non-cardiac chest pain, not further specified ****</b>                                                                                                                                                                                                                                                                                                                                                                                                                                                                                                                                                                                                                                                                                                                                                                                                                                                                                                                                                | 191 (15.7)         | 179 (18.3)      | 0.012   |
| <b>Psychogenic disorders</b>                                                                                                                                                                                                                                                                                                                                                                                                                                                                                                                                                                                                                                                                                                                                                                                                                                                                                                                                                                             | 165 (13.6)         | 85 (8.7)        | 0.005   |
| <b>Gastrointestinal tract disorders</b>                                                                                                                                                                                                                                                                                                                                                                                                                                                                                                                                                                                                                                                                                                                                                                                                                                                                                                                                                                  | 89 (7.3)           | 68 (6.9)        | 0.776   |
| <b>Respiratory tract disorders</b>                                                                                                                                                                                                                                                                                                                                                                                                                                                                                                                                                                                                                                                                                                                                                                                                                                                                                                                                                                       | 61 (5.0)           | 56 (5.7)        | 0.203   |
| <b>Other non-urgent diagnoses*****</b>                                                                                                                                                                                                                                                                                                                                                                                                                                                                                                                                                                                                                                                                                                                                                                                                                                                                                                                                                                   | 110 (9.1)          | 65 (6.6)        | 0.152   |
| <p>* Almost all patients (96.0%) were diagnosed by a cardiologist. Ten (4.0%) ACS patients were not diagnosed by a cardiologist; four died before arrival of the ambulance, one patient died after resuscitation at the ED (all these five were classified as acute cardiac death due to ACS), and in five patients the ACS diagnosis was solely based on the GP's interpretation in patients who were not referred to the hospital after shared decision because of a short life expectancy due to cancer in a palliative stage.</p> <p>** Stroke, severe COPD exacerbation, acute severe heart failure, sepsis, hypokalaemia, diabetic ketoacidosis, epileptic insult, bleeding from oesophageal varices, ovarian torsion, ventricular fibrillation.</p> <p>*** Stable angina pectoris (including atypical chest pain), stable heart failure, arrhythmias, hypertension</p> <p>**** Cardiac pathology unlikely after cardiologist's or GP's diagnostic work-up, but without differential diagnosis</p> |                    |                 |         |

\*\*\*\*\* Amongst others: anaemia, carcinoma, vasovagal collapse, side effects medication, dermatological diseases (e.g. herpes Zoster infection)

Twenty-eight (2.3%) females and 37 males (3.8%) had another life-threatening event than ACS (e.g. pulmonary embolism, thoracic aortic dissection, acute abdominal aneurysm). All other patients (85.6%) had non-urgent medical conditions such as non-urgent cardiovascular disease (18.9%), musculoskeletal pain (17.9%), non-cardiac chest pain (not further specified) (16.9%), psychogenic disorder (11.4%), gastrointestinal disorders (7.2%), respiratory disorders (5.3%), and other non-urgent diagnoses (8.0%).

#### *Model development, performance and validation*

The base model with sex and age had an apparent c-statistic of 0.72 (95% CI 0.70-0.75), and an internal-external validation based c-statistic of 0.72 (95% 0.68-0.75) (Appendix- Table 6). The basic model shows that the risk of ACS increases with age for both sexes, with a notable peak risk for men at an age near 60 years and a more gradual increase in risk of ACS for women (Figure 2). The full model including all candidate predictors had an apparent c-statistic of 0.79 (95% CI 0.76-0.81) and an internal-external validation based c-statistic of 0.77 (95% CI 0.74-0.80) (Appendix - Table 7). The full model had optimal calibration (flexible line close to the 45-degree reference line) up to a predicted probability of ACS of approximately 0.2 (Appendix-Figure 1). Risks higher than 0.2 tended to be overestimated by the model, however since any plausible risk threshold will be lower than 0.2 in the primary care setting, we find the calibration in the relevant range to be satisfactory. After backward elimination, the backward model had an apparent c-statistic of 0.79 (95% CI 0.76-0.81), and the internal-external validation c-statistic was 0.77 (95% CI 0.74-0.79). It had very similar calibration to the full model (Table 3, Figure 3).

**Table 3. Final model for predicting the diagnosis ACS.**

| Predictors          | Regression coefficients (standard error) |
|---------------------|------------------------------------------|
| Intercept           | -16.246 (3.527)                          |
| Age                 | 0.293 (0.081)                            |
| Age'                | -0.391 (0.125)                           |
| Age''               | 1.063 (0.395)                            |
| Female gender       | 2.504 (5.512)                            |
| Age * female gender | -0.096 (0.126)                           |

|                                                             |                |
|-------------------------------------------------------------|----------------|
| Age' * female gender                                        | 0.189 (0.195)  |
| Age'' * female gender                                       | -0.556 (0.605) |
| Acute chest pain shorter than 12 hours                      | 0.290 (0.198)  |
| Sweating                                                    | 0.457 (0.178)  |
| Radiation of chest pain                                     | 0.609 (0.176)  |
| Pressing heavy pain                                         | 0.747 (0.200)  |
| Call during the night (0am-9am)                             | 0.504 (0.151)  |
| Apparent c-statistic 0.79 (95% CI 0.76-0.81)                |                |
| Adjusted c-statistic 0.77 (95% CI 0.74-0.79)                |                |
| Calibration slope 0.826 (95% CI 0.658-0.994)                |                |
| Calibration -0.224 (95% CI -0.604-0.157)                    |                |
| R <sup>2</sup> 0.106                                        |                |
| Knots for cubic spline functions placed at 5, 35, 65 and 95 |                |

#### *Decision curve analyses and risk thresholds*

Both the full and backward model showed a high net benefit as compared to the currently used NTS model for telephone triage in OHS-PC (Figure 4). There was no difference in net benefit between the full model and backward model across plausible risk thresholds. Based on this analysis we decided to choose the backward as the final triage tool model because; 1) with fewer predictors the prediction of ACS remained similar accurate and 2) no valuable time is lost during telephone triage by asking the patient about symptoms that do not contribute to a better prediction. The final model included besides age and sex, the five following predictors; (i) acute onset of chest pain lasting <12 hours, (ii) a pressing/heavy character, (iii) radiation of pain, (iv) sweating, (v) calling at night between 0.00 and 9.00am. Finally, we evaluated the diagnostic performance of the final prediction model across risk thresholds that may be chosen to apply in clinical practice (Table 4, Figure 5).



**Table 4. Diagnostic accuracy for a range of risk thresholds of the final model**

| Risk threshold            | Sensitivity<br>(95% CI) | Specificity<br>(95% CI) | Positive<br>predictive value | Negative<br>predictive value |
|---------------------------|-------------------------|-------------------------|------------------------------|------------------------------|
| <b>0.001</b>              | 0.98 (0.95-0.99)        | 0.21 (0.18-0.24)        | 0.14                         | 0.99                         |
| <b>0.010</b>              | 0.98 (0.95-0.99)        | 0.42 (0.40-0.45)        | 0.18                         | 0.99                         |
| <b>0.020</b>              | 0.97 (0.94-0.99)        | 0.50 (0.47-0.54)        | 0.20                         | 0.99                         |
| <b>0.050</b>              | 0.93 (0.87-0.96)        | 0.63 (0.59-0.67)        | 0.25                         | 0.99                         |
| <b>0.075</b>              | 0.88 (0.81-0.92)        | 0.72 (0.68-0.76)        | 0.29                         | 0.98                         |
| <b>0.100</b>              | 0.81 (0.7-0.87)         | 0.79 (0.76-0.82)        | 0.33                         | 0.97                         |
| <b>0.115 (prevalence)</b> | 0.76 (0.67-0.83)        | 0.82 (0.79-0.85)        | 0.36                         | 0.96                         |
| <b>0.150</b>              | 0.64 (0.56-0.73)        | 0.88 (0.85-0.90)        | 0.41                         | 0.95                         |
| <b>0.200</b>              | 0.46 (0.38-0.55)        | 0.93 (0.91-0.94)        | 0.46                         | 0.93                         |

## Discussion

This is the first study that developed and internal-external validated a symptom-based prediction rule for telephone triage of ACS in male and female patients who contact OHS-PC for acute chest discomfort (pain, pressure, tightness, or discomfort). ACS was present in 8.3% of the females and 15.3% of the males. The prediction rule is applicable for triage in the OHS-PC setting and consists of sex and age as statistical interaction terms, and five other symptom-based predictors. It had a good discriminative ability (adjusted c-statistic 0.77 (95% CI 0.74-0.79)) and was well calibrated up to an ACS risk of 0.2.

### *Strengths and limitations*

The major strength of this study is that we analysed the original and very first conversations of patients with acute chest discomfort with primary health care providers and assessed these talks without knowledge of the diagnosis; the assessment of symptoms was therefore not affected by hindsight bias caused by knowledge of the final diagnosis.<sup>29</sup> Furthermore, we could analyse a large sample (N=2,192) of patients which allowed us to evaluate up to nineteen candidate predictors. We assessed the risk of selection due to missing outcome data, and our data suggest that this missingness was unlikely to bias our findings. Because we used data from seven different OHS-PC our results will be well generalizable to other OHS-PC in the Netherlands, but we anticipate the model might be applicable to similar OHS-PC

1  
2  
3 setting in for example the UK and Scandinavian countries. Our results may also be generalizable to some  
4 EMS settings, because the prior chance of having an ACS among those calling for acute chest discomfort  
5 is rather similar in the EMS setting as in the OHS-PC setting.<sup>14 30</sup>  
6  
7  
8

9  
10 A limitation of the study is that a full external validation of the final model is not done yet. However, at  
11 the time of executing the study hardly any primary care research data were available to perform such  
12 validation. Importantly, the internal-external validation showed very good calibration up to an ACS risk  
13 of 0.2. Although we performed extensive internal-external validation making use of the datasets of nine  
14 sites with substantial differences in case mix, we will strive for formal external validation before it can  
15 be widely applied in everyday primary care practice. Another limitation is that the effects of the  
16 predictors were assumed to be similar for male and female patients while that might not be optimal for  
17 the predictions. However, development of separate models for males and females would require a  
18 significantly larger sample size than was available. Importantly, a differential non-linear effect of age  
19 was incorporated using a spline function and interaction with sex was incorporated, and the final  
20 internal-external validated model did have good overall performance.  
21  
22  
23  
24  
25  
26  
27  
28  
29

### 30 *Comparison with other studies*

31 Our prediction model had a higher discriminating ability for ACS than the NTS (c-statistic of 0.58) and  
32 modified Grijseels prediction rule (c-statistic of 0.66).<sup>7</sup> This may largely be explained by the addition of  
33 age, the strongest predictor of ACS. This is in line with the notion that the prevalence of ACS increases  
34 with age.<sup>7 9 31</sup> Importantly, in our study among people aged below 40, only one (0.4%) male patient had  
35 an ACS (UAP). For males to the age of 55 we found a peak risk of ACS of around 20% and remaining at  
36 this level with further age increase onwards. For females we found a gradual increase of risk with age  
37 with a maximum ACS risk of around 18% for those aged over 80 years. Similar to the modified Grijseels  
38 prediction rule our prediction model includes sweating and radiation of pain, however, the modified  
39 Grijseels rule combined nausea and sweating to a single predictor (i.e., nausea or sweating).<sup>7 8</sup> Age and  
40 sex were predictors in our model, but also in the MHS and INTERCHEST prediction models.<sup>32 33</sup> Also the  
41 INTERCHEST rule included pressing heavy chest pain as predictor.<sup>32</sup> A new predictor is calling at night  
42 (between 0.00-9.00am).<sup>19</sup> Previous studies in the ED setting also showed circadian variability with an  
43 early morning peak for ACS patients.<sup>34</sup> Finally, symptoms associated with ACS were rather similar  
44 between females and males, which is in line with recent sex-stratified studies of patients with chest  
45 discomfort who called the OHS-PC, but is in contrast with the prevailing opinion.<sup>16 17 35</sup>  
46  
47  
48  
49  
50  
51  
52  
53  
54  
55  
56  
57  
58  
59  
60

1  
2  
3  
4  
5 We performed decision curve analyses to investigate what would be the optimal threshold of ACS  
6 predicted probability to initiate treatment, where 'treatment' in pre-hospital setting refers to urgent  
7 referral for hospital admission (U1, ambulance within 15 minutes). However, there is a principal  
8 difference between diagnostic probability and categories of urgencies. Risk prediction provides a  
9 continuous value of the probability of disease, while urgency level categorisation is based on the  
10 interpretation of how risk probability can be translated in urgency, and time within a patient should be  
11 seen and treatment delivered. Context is needed to determine optimal thresholds, which concerns what  
12 percentage of missing ACS is considered as acceptable by health care providers, patients and  
13 policymakers. This percentage is expected to be very low because a missed ACS can result in permanent  
14 cardiac impairment, heart failure, life-threatening arrhythmias in the early phase, and death.<sup>36</sup>  
15 Furthermore missing an ACS is the most common reason for malpractice claims worldwide.<sup>37</sup> A survey  
16 performed among 1,029 ED doctors in the US, New Zealand and Australia showed that they considered  
17 an average missing rate between 0.1-1% (range 0-10%) as acceptable.<sup>38</sup> When we apply a maximum of  
18 1% missing with our prediction rules, the threshold has to be set at a predicted risk of ACS of 0.05  
19 (negative predictive value of 0.99, Table 6), which means based on our data that the majority of patients  
20 needs urgent referral. This would result in over-crowded EMS and EDs, and with the available resources  
21 being limited, this may result in exceeding target triage times, which could compromise patient safety in  
22 another way.<sup>39</sup> A possible alternative to consider may be applying different 'treatments' per thresholds,  
23 i.e. dispatching an ambulance (U1) for the high predicted risk patients, and GP visit within one hour (U2)  
24 for the low predicted risk patients. During GP visit more clinical parameters (blood pressure, heart rate,  
25 overall clinical impression) can be gathered to improve ACS risk prediction, and in the future, there  
26 might be room for applying point-of-care high-sensitivity troponin testing, as these are nowadays only  
27 available in the ED setting.<sup>40</sup> In order to determine the ideal threshold, external validation will be  
28 needed combined with clinical and management considerations. The development of this diagnostic  
29 model is the necessary first step towards an implementation study in which this model is adapted to  
30 urgency levels that can be applied by triage nurses during telephone triage at the OHS-PC. The  
31 diagnostic model needs to be 'translated' in simple yes/no questions that can be incorporated in the  
32 existing NTS and a personalized risk prediction for age and gender is generated. Some older questions  
33 will then be substituted. We are aiming to do so in an implementation study applying action research.  
34  
35  
36  
37  
38  
39  
40  
41  
42  
43  
44  
45  
46  
47  
48  
49  
50  
51  
52  
53  
54  
55  
56  
57  
58  
59  
60

### *Implications for clinical practice and future research*

This symptom-based prediction model for ACS has good discrimination and calibration and could readily be applied for telephone triage of patients with acute chest discomfort in primary care, notably the OHS-PC setting. The results of the decision curve analysis showed a large net benefit over a range of plausible risk threshold as compared to the currently used NTS model in the OHS-PC in the Netherlands. For future research, full external validation in other OHS-PC or EMS populations could further optimize and update the model. Furthermore, sex-specific prediction models could be developed for ACS, but given the overlap in symptoms between men and women, this would not result in major changes in predictors.

### **Conclusion**

The final prediction model for ACS has good discrimination and calibration and shows promise for replacing the existing telephone triage rules for patients with acute chest discomfort in general practice and OHS-PC. However, future research with an external validation is needed to provide insights into how the prediction model can be applied in practice.

### **Ethical approval**

The study (National Trial Register identification number: NTR7331) was approved by the Medical Ethics Committee Utrecht, the Netherlands (reference number WAG/mb/16/003208) and complied with the Declaration of Helsinki. A waiver of informed consent was given because our study had minimal risk to subjects and could otherwise not be carried out logistically. Personal and research data were handled and stored according to the European General Data Protection Regulation.

**Acknowledgements** The authors would like to thank the OHS-PC foundation 'Primair Huisartsenposten' and all employees of the participating locations for or their cooperation in this study, notably for providing data and technical support.

**Funding** This study was funded by an unrestricted grant from (i) the department of general practice of the University Medical Centre Utrecht, (ii) a personal promotion grant of D.L. Zwart, MD, PhD, (iii) the foundation 'The Netherlands Triage Standard', and (iv) the foundation 'Stoffels-Hornstra'. This study contributes to the 2020B004 IMPRESS study which is funded by the Dutch Heart Foundation/Dutch Cardiovascular Alliance (DHF/DCVA).

**Competing interest statement** All authors declare they have no conflict of interest. All authors have seen and agree with the contents of the manuscript and there is no financial interest to report. We certify that the submission is original work and is not under review at any other publication.

**Data sharing statement** Data can be made available for researchers whose proposed use of the data has been approved at request of the corresponding author, with a signed data access agreement.

**Author contribution** FR and DZ are the lead investigators who conceived the research idea and methodology. Funding acquisition was done by FR, DZ and RD. LW and DE conducted data acquisition. LW performed the analyses and wrote the first draft of the manuscript. She was supervised by FR and DZ, who critically revised the manuscript, and by MvS who was involved with the analyses. DE, EdG, EA, HdR, AH and RD contributed to and approved of the final version of the manuscript.

## References

1. Rui P, Kang K. National Hospital Ambulatory Medical Care Survey: 2017 Emergency Department Summary Tables (cdc.gov).
2. Mol KA, Smoczynska A, Rahel BM, et al. Non-cardiac chest pain: prognosis and secondary healthcare utilisation. *Open Heart* 2018;5(2):e000859. doi: 10.1136/openhrt-2018-000859
3. Collet JP, Thiele H, Barbato E, et al. 2020 ESC Guidelines for the management of acute coronary syndromes in patients presenting without persistent ST-segment elevation. *Rev Esp Cardiol* 2021;74(6):544. doi: 10.1016/j.rec.2021.05.002
4. Burman RA, Zakariassen E, Hunnskaar S. Management of chest pain: a prospective study from Norwegian out-of-hours primary care. *BMC Fam Pract* 2014;15:51. doi: 10.1186/1471-2296-15-51
5. Deakin CD, Sherwood DM, Smith A, et al. Does telephone triage of emergency (999) calls using Advanced Medical Priority Dispatch (AMPDS) with Department of Health (DH) call prioritisation effectively identify patients with an acute coronary syndrome? An audit of 42,657 emergency calls to Hampshire Ambulance Service NHS Trust. *Emerg Med J* 2006;23(3):232-5. doi: 10.1136/emj.2004.022962
6. Bruyninckx R, Aertgeerts B, Bruyninckx P, et al. Signs and symptoms in diagnosing acute myocardial infarction and acute coronary syndrome: a diagnostic meta-analysis. *Br J Gen Pract* 2008;58(547):105-11. doi: 10.3399/bjgp08X277014
7. Bruins Slot MH, Rutten FH, van der Heijden GJ, et al. Diagnosing acute coronary syndrome in primary care: comparison of the physicians' risk estimation and a clinical decision rule. *Fam Pract* 2011;28(3):323-8. doi: 10.1093/fampra/cmq116
8. Grijseels EW, Deckers JW, Hoes AW, et al. Implementation of a pre-hospital decision rule in general practice. Triage of patients with suspected myocardial infarction. *Eur Heart J* 1996;17(1):89-95.
9. Harskamp RE, Laeven SC, Himmelreich JC, et al. Chest pain in general practice: a systematic review of prediction rules. *BMJ open* 2019;9(2):e027081. doi: 10.1136/bmjopen-2018-027081
10. Wouters LT, Rutten FH, Erkelens DC, et al. Accuracy of telephone triage in primary care patients with chest discomfort: a cross-sectional study. *Open Heart* 2020;7(2) doi: 10.1136/openhrt-2020-001376

- 1  
2  
3 11. Leite L, Baptista R, Leitaó J, et al. Chest pain in the emergency department: risk stratification with  
4 Manchester triage system and HEART score. *BMC Card Disorders* 2015;15:48. doi:  
5 10.1186/s12872-015-0049-6  
6  
7
- 8 12. Leeflang MM, Rutjes AW, Reitsma JB, et al. Variation of a test's sensitivity and specificity with  
9 disease prevalence. *CMAJ* 2013;185(11):E537-44. doi: 10.1503/cmaj.121286  
10
- 11 13. Buntinx F, Knockaert D, Bruyninckx R, et al. Chest pain in general practice or in the hospital  
12 emergency department: is it the same? *Fam Pract* 2001;18(6):586-9.  
13
- 14 14. Rawshani A, Larsson A, Gelang C, et al. Characteristics and outcome among patients who dial for the  
15 EMS due to chest pain. *Int J Cardiol* 2014;176(3):859-65. doi: 10.1016/j.ijcard.2014.08.004  
16
- 17 15. Kuriyama A, Urushidani S, Nakayama T. Five-level emergency triage systems: variation in assessment  
18 of validity. *Emerg Med J* 2017;34(11):703-10. doi: 10.1136/emermed-2016-206295  
19
- 20 16. van der Meer MG, Appelman Y, Rutten KHG, et al. Are there gender disparities in symptom  
21 presentation or triage of patients with chest discomfort at primary care out-of-hours services?  
22 An observational study. *BMJ open* 2019;9(11):e031613. doi: 10.1136/bmjopen-2019-031613  
23
- 24 17. Wouters LTCM, Zwart DLM, Erkelens DCA, et al. Gender-stratified analyses of symptoms associated  
25 with acute coronary syndrome in telephone triage: a cross-sectional study. *BMJ open* 2021;11  
26 doi: 10.1136/bmjopen-2020-042406  
27
- 28 18. Erkelens DC, Wouters LT, Zwart DL, et al. Optimisation of telephone triage of callers with symptoms  
29 suggestive of acute cardiovascular disease in out-of-hours primary care: observational design of  
30 the Safety First study. *BMJ open* 2019;9(7):e027477. doi: 10.1136/bmjopen-2018-027477  
31
- 32 19. Wouters LT, Zwart DL, Erkelens DC, et al. Chest discomfort at night and risk of acute coronary  
33 syndrome: cross-sectional study of telephone conversations. *Fam Pract* 2020 doi:  
34 10.1093/fampra/cmaa005  
35
- 36 20. Riley RD, Ensor J, Snell KIE, et al. Calculating the sample size required for developing a clinical  
37 prediction model. *BMJ* 2020;368:m441. doi: 10.1136/bmj.m441  
38
- 39 21. van Smeden M, Moons KG, de Groot JA, et al. Sample size for binary logistic prediction models:  
40 Beyond events per variable criteria. *Stat Methods Med Res* 2019;28(8):2455-74. doi:  
41 10.1177/0962280218784726  
42
- 43 22. Steyerberg EW, Harrell FE, Jr. Prediction models need appropriate internal, internal-external, and  
44 external validation. *J Clin Epidemiol* 2016;69:245-7. doi: 10.1016/j.jclinepi.2015.04.005  
45
- 46 23. Wynants L, van Smeden M, McLernon DJ, et al. Three myths about risk thresholds for prediction  
47 models. *BMC Med* 2019;17(1):192. doi: 10.1186/s12916-019-1425-3  
48  
49  
50  
51  
52  
53  
54  
55  
56  
57  
58  
59  
60

- 1  
2  
3 24. Reitsma JB, Glas AS, Rutjes AW, et al. Bivariate analysis of sensitivity and specificity produces  
4  
5 informative summary measures in diagnostic reviews. *J Clin Epidemiol* 2005;58(10):982-90. doi:  
6  
7 10.1016/j.jclinepi.2005.02.022
- 8  
9 25. Jolani S, Debray TP, Koffijberg H, et al. Imputation of systematically missing predictors in an  
10  
11 individual participant data meta-analysis: a generalized approach using MICE. *Stat Med*  
12  
13 2015;34(11):1841-63. doi: 10.1002/sim.6451
- 14  
15 26. Rubin DB. Multiple imputation for non response in surveys. *John Wiley & Sons, Hoboken, NJ* 1987
- 16  
17 27. Harrell FE, Jr. Regression Modeling Strategies: With Applications to Linear Models, Logistic and  
18  
19 Ordinal Regression, and Survival Analysis. Second edition ed. Cham, Switzerland: Springer  
20  
21 International 2015.
- 22  
23 28. Moons KG, Altman DG, Reitsma JB, et al. Transparent Reporting of a multivariable prediction model  
24  
25 for Individual Prognosis or Diagnosis (TRIPOD): explanation and elaboration. *Ann Int Med*  
26  
27 2015;162(1):W1-73. doi: 10.7326/M14-0698
- 28  
29 29. Zwaan L, Monteiro S, Sherbino J, et al. Is bias in the eye of the beholder? A vignette study to assess  
30  
31 recognition of cognitive biases in clinical case workups. *BMJ Qual Saf* 2017;26(2):104-10. doi:  
32  
33 10.1136/bmjqs-2015-005014
- 34  
35 30. Scott G, Clawson JJ, Gardett I, et al. 9-1-1 Triage of Non-Traumatic Chest Pain: Association with  
36  
37 Hospital Diagnosis. *Prehosp Emerg Care* 2017;21(4):525-34. doi:  
38  
39 10.1080/10903127.2017.1302530
- 40  
41 31. Canto JG, Rogers WJ, Goldberg RJ, et al. Association of age and sex with myocardial infarction  
42  
43 symptom presentation and in-hospital mortality. *JAMA* 2012;307(8):813-22. doi:  
44  
45 10.1001/jama.2012.199
- 46  
47 32. International Working Group on Chest Pain in Primary C, Aerts M, Minalu G, et al. Pooled individual  
48  
49 patient data from five countries were used to derive a clinical prediction rule for coronary artery  
50  
51 disease in primary care. *J Clin Epidemiol* 2017;81:120-28. doi: 10.1016/j.jclinepi.2016.09.011
- 52  
53 33. Haasenritter J, Donner-Banzhoff N, Bosner S. Chest pain for coronary heart disease in general  
54  
55 practice: clinical judgement and a clinical decision rule. *Br J Gen Pract* 2015;65(640):e748-53.  
56  
57 doi: 10.3399/bjgp15X687385
- 58  
59 34. Ekelund U, Akbarzadeh M, Khoshnood A, et al. Likelihood of acute coronary syndrome in emergency  
60  
61 department chest pain patients varies with time of presentation. *BMC Res Notes* 2012;5:420.  
62  
63 doi: 10.1186/1756-0500-5-420



- 1  
2  
3 35. van Oosterhout REM, de Boer AR, Maas A, et al. Sex Differences in Symptom Presentation in Acute  
4 Coronary Syndromes: A Systematic Review and Meta-analysis. *J Am Heart Assoc*  
5 2020;9(9):e014733. doi: 10.1161/JAHA.119.014733  
6  
7  
8 36. Bugiardini R, Ricci B, Cenko E, et al. Delayed Care and Mortality Among Women and Men With  
9 Myocardial Infarction. *J Am Heart Assoc* 2017;6(8) doi: 10.1161/JAHA.117.005968  
10  
11 37. Ernesater A, Winblad U, Engstrom M, et al. Malpractice claims regarding calls to Swedish telephone  
12 advice nursing: what went wrong and why? *J Telemed Telecare* 2012;18(7):379-83. doi:  
13 10.1258/jtt.2012.120416  
14  
15  
16 38. Than M, Herbert M, Flaws D, et al. What is an acceptable risk of major adverse cardiac event in chest  
17 pain patients soon after discharge from the Emergency Department?: a clinical survey. *Int J*  
18 *Cardiol* 2013;166(3):752-4. doi: 10.1016/j.ijcard.2012.09.171  
19  
20  
21 39. van der Linden MC, Meester BE, van der Linden N. Emergency department crowding affects triage  
22 processes. *Int Emerg Nurs* 2016;29:27-31. doi: 10.1016/j.ienj.2016.02.003  
23  
24  
25 40. Pickering JW, Young JM, George PM, et al. Validity of a Novel Point-of-Care Troponin Assay for  
26 Single-Test Rule-Out of Acute Myocardial Infarction. *JAMA Cardiol* 2018;3(11):1108-12. doi:  
27 10.1001/jamacardio.2018.3368  
28  
29  
30  
31  
32  
33  
34  
35  
36  
37  
38  
39  
40  
41  
42  
43  
44  
45  
46  
47  
48  
49  
50  
51  
52  
53  
54  
55  
56  
57  
58  
59  
60

1  
2  
3 **Figure legends**

4 **Figure 1. Flowchart of study population.**

5  
6 **Figure 2. Base model with age and sex for predicting diagnosis acute coronary syndrome.**

7  
8 **Figure 3. Calibration of the final model with internal external validation.**

9  
10 **Figure 4. Decision curve analyses comparing the full and final models versus the currently used model**  
11 **and versus treat all patients.**

12  
13 **Figure 5. Runway plot of diagnostic accuracy measures of the final model.**

14  
15  
16  
17  
18  
19  
20  
21  
22  
23  
24  
25  
26  
27  
28  
29  
30  
31  
32  
33  
34  
35  
36  
37  
38  
39  
40  
41  
42  
43  
44  
45  
46  
47  
48  
49  
50  
51  
52  
53  
54  
55  
56  
57  
58  
59  
60

For peer review only

1  
2  
3  
4  
5  
6  
7  
8  
9  
10  
11  
12  
13  
14  
15  
16  
17  
18  
19  
20  
21  
22  
23  
24  
25  
26  
27  
28  
29  
30  
31  
32  
33  
34  
35  
36  
37  
38  
39  
40  
41  
42  
43  
44  
45  
46  
47  
48  
49  
50  
51  
52  
53  
54  
55  
56  
57  
58  
59  
60



Figure 1

254x190mm (96 x 96 DPI)



Figure 2

1360x1360mm (28 x 28 DPI)

1  
2  
3  
4  
5  
6  
7  
8  
9  
10  
11  
12  
13  
14  
15  
16  
17  
18  
19  
20  
21  
22  
23  
24  
25  
26  
27  
28  
29  
30  
31  
32  
33  
34  
35  
36  
37  
38  
39  
40  
41  
42  
43  
44  
45  
46  
47  
48  
49  
50  
51  
52  
53  
54  
55  
56  
57  
58  
59  
60

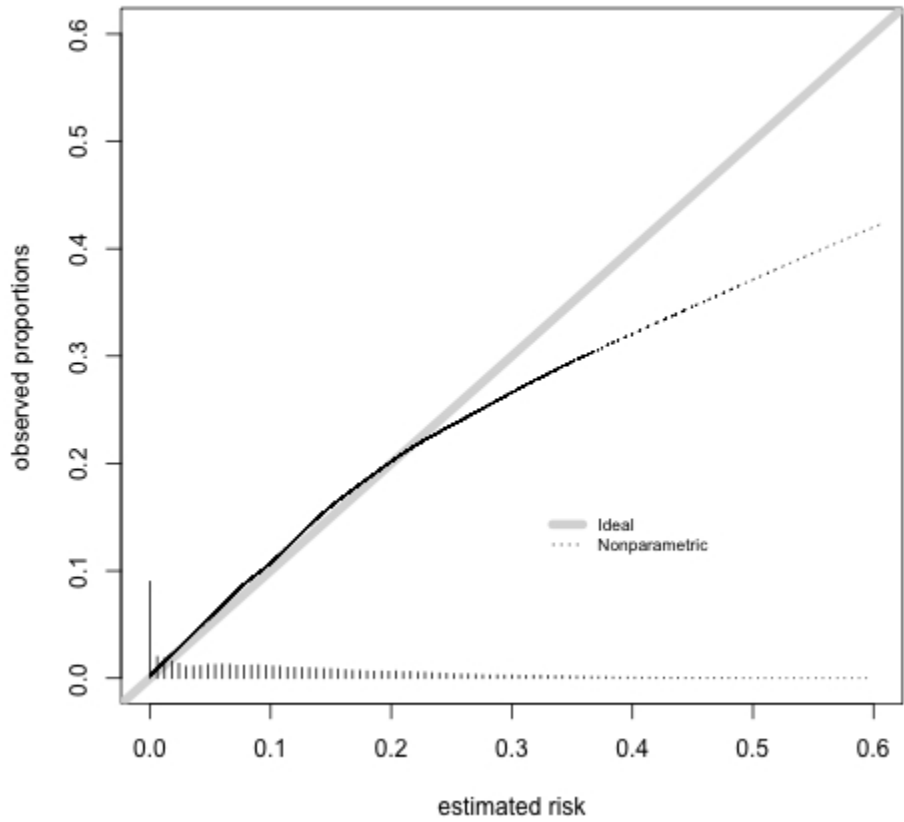

169x169mm (72 x 72 DPI)

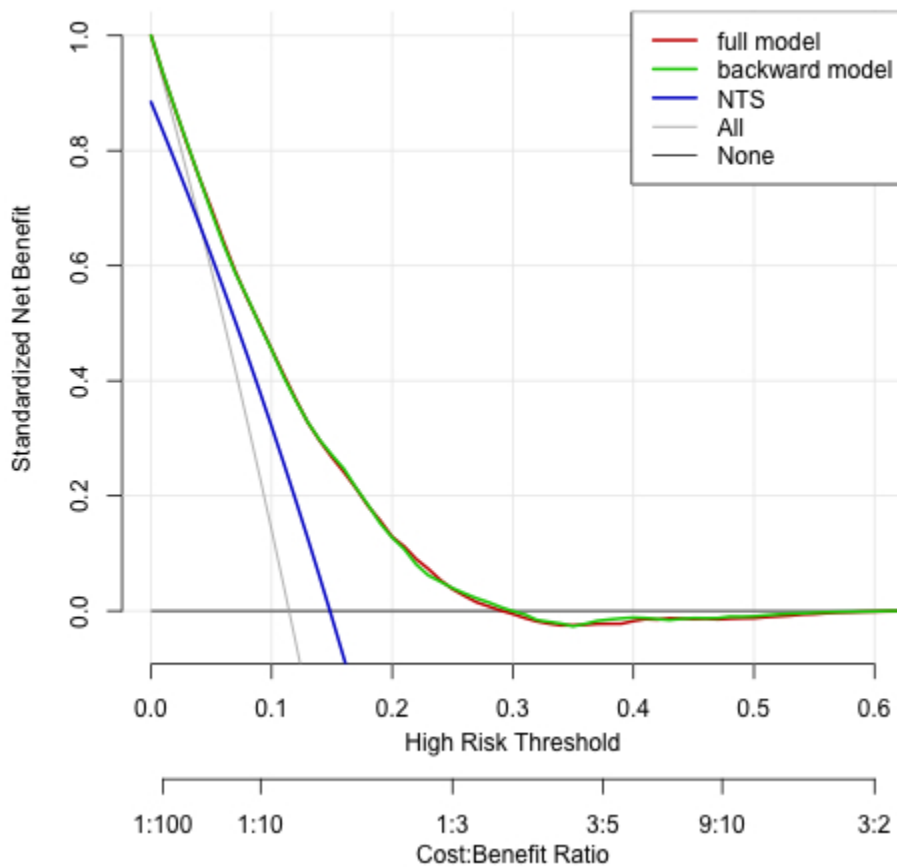

169x169mm (72 x 72 DPI)

1  
2  
3  
4  
5  
6  
7  
8  
9  
10  
11  
12  
13  
14  
15  
16  
17  
18  
19  
20  
21  
22  
23  
24  
25  
26  
27  
28  
29  
30  
31  
32  
33  
34  
35  
36  
37  
38  
39  
40  
41  
42  
43  
44  
45  
46  
47  
48  
49  
50  
51  
52  
53  
54  
55  
56  
57  
58  
59  
60



169x169mm (72 x 72 DPI)

## Appendices

**Appendix - Table 1. NTS urgency levels and response times**

| NTS Urgency level                             | Definition                                | Response time                      | Medical help                              |
|-----------------------------------------------|-------------------------------------------|------------------------------------|-------------------------------------------|
| U0 – Resuscitation                            | Loss of vital functions                   | Immediately                        | Ambulance                                 |
| U1 – Life threatening                         | Unstable vital functions                  | Immediately, within 15 minutes     | Ambulance                                 |
| U2 – Emergent                                 | Vital functions in danger or organ damage | As soon as possible, within 1 hour | Home visit by GP or appointment at OHS-PC |
| U3 – Urgent                                   | Possible risk of damage, human reasons    | A few hours (<3 hours)             | Home visit by GP or appointment at OHS-PC |
| U4 – Non-urgent                               | Marginal risk of damage                   | 24 hours                           | Appointment at OHS-PC or telephone advice |
| U5 – Advice                                   | No risk of damage                         | Advice, no time related            | Telephone advice                          |
| GP: general practitioner                      |                                           |                                    |                                           |
| NTS: Netherlands Triage Standard              |                                           |                                    |                                           |
| OHS-PC: out-of-hours services in primary care |                                           |                                    |                                           |



**Appendix-table 2: Combinations of NTS triage criteria that generate an U1 level within the NTS main complaints that can be used for patients with chest discomfort.**

|                                                                                                                                                                                                                                                                                                                                                                                                              |                                                                                               |                                                                                                                                                                                                                                                            |                                                      |
|--------------------------------------------------------------------------------------------------------------------------------------------------------------------------------------------------------------------------------------------------------------------------------------------------------------------------------------------------------------------------------------------------------------|-----------------------------------------------------------------------------------------------|------------------------------------------------------------------------------------------------------------------------------------------------------------------------------------------------------------------------------------------------------------|------------------------------------------------------|
| → ABCD unstable (no main complaint is selected)                                                                                                                                                                                                                                                                                                                                                              |                                                                                               |                                                                                                                                                                                                                                                            | <b>Urgency level U1: ambulance within 15 minutes</b> |
| Main complaint 'Chest pain'                                                                                                                                                                                                                                                                                                                                                                                  |                                                                                               |                                                                                                                                                                                                                                                            |                                                      |
| → ABCD stable                                                                                                                                                                                                                                                                                                                                                                                                | AND severe chest pain (Numeric Rating Scale (NRS)-score $\geq 8$ ) lasting less than 12 hours |                                                                                                                                                                                                                                                            |                                                      |
| → ABCD stable                                                                                                                                                                                                                                                                                                                                                                                                | AND mild (NRS $\leq 4$ ) to moderate (NRS 5-7) chest pain lasting for less than 12 hours      | AND one of the following:<br>- retrosternal located pain<br>- tightening or pressing<br>- radiation to jaw, arm or upper back<br>- progressive pain intensity in short time<br>- past or present autonomous nervous system-related symptoms<br>- dizziness |                                                      |
| Main complaint 'Collapse'                                                                                                                                                                                                                                                                                                                                                                                    |                                                                                               |                                                                                                                                                                                                                                                            |                                                      |
| → ABCD stable                                                                                                                                                                                                                                                                                                                                                                                                | AND collapse                                                                                  | AND chest pain of any severity                                                                                                                                                                                                                             |                                                      |
| Main complaint 'Back complaints'                                                                                                                                                                                                                                                                                                                                                                             |                                                                                               |                                                                                                                                                                                                                                                            |                                                      |
| → ABCD stable                                                                                                                                                                                                                                                                                                                                                                                                | AND severe upper back pain (NRS $\geq 8$ )                                                    | AND past or present autonomous nervous system-related symptoms                                                                                                                                                                                             |                                                      |
| <p>ABCD: acronym for Airway, Breathing, Circulation and Disability. When the triage nurse starts the telephone triage with the NTS, the system requires a mandatory 'ABCD-check'; i.e. the triage nurse has to ask questions to assess whether the patient has life-threatening problems concerning the Airway, Breathing, Circulation and Disability for which an ambulance should be sent immediately.</p> |                                                                                               |                                                                                                                                                                                                                                                            |                                                      |

**Appendix-table 3. Characteristics of patients divided among the seven OHS-PC locations.**

| Characteristics         | Location A              | Location B               | Location C               | Location D               | Location E              | Location F               | Location G               |
|-------------------------|-------------------------|--------------------------|--------------------------|--------------------------|-------------------------|--------------------------|--------------------------|
|                         | <b>N=205<br/>(9.4%)</b> | <b>N=355<br/>(16.2%)</b> | <b>N=544<br/>(24.8%)</b> | <b>N=262<br/>(12.0%)</b> | <b>N=164<br/>(7.5%)</b> | <b>N=412<br/>(18.8%)</b> | <b>N=250<br/>(11.4%)</b> |
| Prevalence of ACS (n,%) | 32 (15.4%)              | 31 (8.7%)                | 59 (10.8%)               | 35 (13.4%)               | 15 (9.1%)               | 53 (12.9%)               | 26 (10.4%)               |
| Male sex (n,%)          | 77 (37.6%)              | 154 (43.4%)              | 256 (47.1%)              | 108 (41.2%)              | 84 (51.2%)              | 188 (45.6%)              | 112 (44.8%)              |
| Mean age in years (SD)  | 62.3 (19.6)             | 58.6 (19.8)              | 58.0 (19.4)              | 56.6 (18.9)              | 61.8 (20.5)             | 61.6 (19.4)              | 56.1 (18.7)              |

**Appendix – table 4. Overview of the percentages of missing predictors, divided into patients with and without the diagnosis ACS.**

| Characteristics<br>N=2192                      | ACS, n=251<br>(11.5%)<br>Missing (%) | No ACS, n=1941<br>(88.5%)<br>Missing (%) |
|------------------------------------------------|--------------------------------------|------------------------------------------|
| Mean in years age (SD)                         | 0                                    | 0                                        |
| Female sex                                     | 0                                    | 0                                        |
| Median call duration in min (IQR)              | 0                                    | 0                                        |
| Mean patient's introduction in min (IQR)       | 0                                    | 0                                        |
| Triage nurse consulted the GP                  | 0                                    | 0                                        |
| Someone else called on behalf of patient       | 0                                    | 0                                        |
| The person who calls expressed concerns        | 144 (57.3)                           | 943 (48.6)                               |
| Cardiovascular disease or risk factor combined | 30 (12.0)                            | 318 (16.4)                               |
| History of coronary artery disease             | 107 (42.6)                           | 933 (48.1)                               |
| Diabetes                                       | 162 (64.5)                           | 1126 (58.0)                              |
| Hypertension                                   | 172 (68.5)                           | 1126 (58.0)                              |
| Hypercholesterolemia/statin use                | 172 (68.5)                           | 1196 (61.6)                              |
| Cardiac arrhythmia                             | 176 (70.1)                           | 1110 (57.2)                              |
| Chest pain                                     | 4 (1.6)                              | 72 (3.7)                                 |

|                                                                                                                                                                                                                                                     |            |             |
|-----------------------------------------------------------------------------------------------------------------------------------------------------------------------------------------------------------------------------------------------------|------------|-------------|
| Shortness of breath                                                                                                                                                                                                                                 | 68 (27.1)  | 429 (22.1)  |
| Chest pain duration <12 hours                                                                                                                                                                                                                       | 28 (11.2)  | 242 (13.1)  |
| Pain intensity severe (NRS >7 in range 1-10)                                                                                                                                                                                                        | 149 (59.4) | 1124 (57.9) |
| Pressing heavy pain*                                                                                                                                                                                                                                | 63 (25.1)  | 502 (25.9)  |
| Stabbing chest pain*                                                                                                                                                                                                                                | 63 (25.1)  | 502 (25.9)  |
| Chest pain located retrosternal**                                                                                                                                                                                                                   | 87 (34.7)  | 538 (27.7)  |
| Chest pain located left or right on thorax**                                                                                                                                                                                                        | 87 (34.7)  | 538 (27.7)  |
| Radiation of chest pain to any location                                                                                                                                                                                                             | 38 (15.1)  | 476 (24.5)  |
| Radiation to the arm ***                                                                                                                                                                                                                            | 94 (37.5)  | 1019 (52.5) |
| Radiation to the shoulder blades ***                                                                                                                                                                                                                | 94 (37.5)  | 1019 (52.5) |
| Radiation to the jaws ***                                                                                                                                                                                                                           | 94 (37.5)  | 1019 (52.5) |
| Sweating                                                                                                                                                                                                                                            | 79 (31.5)  | 747 (38.5)  |
| Nausea or vomiting                                                                                                                                                                                                                                  | 133 (53.0) | 1071 (55.2) |
| Pallor or ashen skin                                                                                                                                                                                                                                | 158 (62.9) | 1361 (70.1) |
| (Near) fainting                                                                                                                                                                                                                                     | 33 (13.1)  | 217 (11.2)  |
| Palpitations                                                                                                                                                                                                                                        | 225 (89.6) | 1615 (83.2) |
| Patient recognizes symptoms from previous cardiac event                                                                                                                                                                                             | 139 (55.4) | 1137 (58.6) |
| *Pain described by patient. Pressing heavy pain: pressing, heavy or tightening pain vs. other types of pain (stabbing, burning, cramping, tearing) Stabbing pain: stabbing vs. other types of pain (pressing, heavy, tightening, burning, cramping) |            |             |
| ** Retrosternal location vs. other pain locations. Left or right side thorax vs. other pain locations                                                                                                                                               |            |             |
| *** Radiation location vs. no radiation and radiation other pain                                                                                                                                                                                    |            |             |

**Appendix-table 5. Patient and call characteristics of 3,204 patients with chest discomfort calling OHS-PC between 2014-2017, comparing patients with and without information on the study outcome.**

| Characteristics<br>N=3,204                             | Follow-up<br>n= 2192 (68.4%) | No follow-up<br>n= 1012 (31.6%) | P-value |
|--------------------------------------------------------|------------------------------|---------------------------------|---------|
| <b>Patient characteristics</b>                         |                              |                                 |         |
| Median age in years (IQR) (n=3,204)                    | 59.1 (19.5)                  | 57.3 (20.4)                     | 0.020   |
| Female sex (n=3,204)                                   | 1213 (55.3)                  | 565 (55.8)                      | 0.794   |
| <b>Call characteristics</b>                            |                              |                                 |         |
| Median total call duration in min (IQR) (n=3,204)      | 6:51 (4:59-9:23)             | 6:56 (5:04-9:15)                | 0.836   |
| Mean patient's introduction in min (IQR) (n=3,204)     | 0:17 (0:11-0:25)             | 0:17 (0:11-0:26)                | 0.052   |
| Triage nurse consulted the GP (n=3,204)                | 1147 (52.3)                  | 519 (51.3)                      | 0.583   |
| Someone else called on behalf of patient (n=3,204)     | 1114 (50.8)                  | 479 (47.3)                      | 0.066   |
| Person who calls expressed concerns (n=1,478)          | 988 (89.7)                   | 430 (90.1)                      | 0.804   |
| <b>Medical history and risk factors</b>                |                              |                                 |         |
| Cardiovascular disease or CV risk factor (n=2,672)     | 1192 (64.6)                  | 515 (62.3)                      | 0.254   |
| History of coronary artery disease (n=1,663)           | 389 (33.8)                   | 166 (32.4)                      | 0.573   |
| Diabetes (n=1,283)                                     | 180 (19.9)                   | 68 (18.0)                       | 0.432   |
| Hypertension (n=1,274)                                 | 323 (36.1)                   | 121 (31.9)                      | 0.150   |
| Hypercholesterolemia/statin use (n=1,176)              | 212 (25.7)                   | 88 (25.1)                       | 0.842   |
| Cardiac arrhythmia (n=1,326)                           | 230 (25.4)                   | 102 (24.3)                      | 0.684   |
| <b>Symptoms</b>                                        |                              |                                 |         |
| Chest pain (n=3,079)                                   | 1981 (93.6)                  | 894 (92.8)                      | 0.417   |
| Shortness of breath (n=2,505)                          | 1094 (64.5)                  | 520 (64.3)                      | 0.911   |
| Chest pain duration <12 hours (n=2,793)                | 1403 (73.2)                  | 610 (69.6)                      | 0.052   |
| Severe pain (NRS >7 in range 1-10) (n=1,351)           | 337 (36.6)                   | 185 (43.0)                      | 0.024   |
| Pressing, heavy pain* (n=2,347)                        | 1023 (62.9)                  | 444 (61.6)                      | 0.538   |
| Stabbing chest pain* (n=2,349)                         | 366 (22.5)                   | 177 (24.5)                      | 0.280   |
| Chest pain located retrosternal** (n=2,298)            | 641 (40.9)                   | 294 (40.2)                      | 0.736   |
| Chest pain located left or right on thorax** (n=2,299) | 627 (40.0)                   | 294 (40.2)                      | 0.945   |
| Radiation of chest pain to any location (n=2,437)      | 1077 (64.3)                  | 458 (60.1)                      | 0.047   |
| Radiation to the arm ***(n=1,521)                      | 452 (42.2)                   | 179 (39.8)                      | 0.373   |

|                                                                   |             |            |       |
|-------------------------------------------------------------------|-------------|------------|-------|
| Radiation to the shoulder blades *** (n=1,519)                    | 326 (30.5)  | 136 (30.2) | 0.924 |
| Radiation to the jaws *** (n=1,984)                               | 124 (11.6)  | 41 (9.1)   | 0.156 |
| Sweating (n=1,758)                                                | 559 (40.9)  | 259 (42.0) | 0.638 |
| Nausea or vomiting (n=1,474)                                      | 489 (49.5)  | 229 (47.1) | 0.381 |
| Pallor or ashen skin (n=1,007)                                    | 322 (47.8)  | 136 (40.8) | 0.038 |
| (Near) fainting (n=2,855)                                         | 143 (7.4)   | 72 (7.8)   | 0.678 |
| Palpitations (n=501)                                              | 284 (80.7)  | 125 (83.9) | 0.396 |
| Patient recognizes symptoms from previous cardiac event (n=1,298) | 250 (27.3)  | 102 (26.7) | 0.819 |
| <b>Urgency allocation</b>                                         |             |            |       |
| High urgency (U1 or U2) (n=3,204)                                 | 1496 (68.2) | 661 (65.3) | 0.100 |
| U1                                                                | 974 (44.5)  | 390 (38.6) |       |
| U2                                                                | 522 (23.8)  | 271 (26.8) |       |
| Low urgency (U3 or U4 or U5)                                      | 696 (31.8)  | 351 (34.7) |       |

**Appendix - Table 6. Base model with age and sex for predicting the diagnosis ACS.**

| Predictors                                                  | Regression coefficients (standard error) |
|-------------------------------------------------------------|------------------------------------------|
| Intercept                                                   | - 14.671 (3.442)                         |
| Age                                                         | 0.289 (0.079)                            |
| Age'                                                        | - 0.379 (0.123)                          |
| Age''                                                       | 1.017 (0.386)                            |
| Female sex                                                  | 2.155 (5.385)                            |
| Age * Female sex                                            | - 0.084 (0.123)                          |
| Age' * Female sex                                           | 0.175 (0.190)                            |
| Age'' * Female sex                                          | - 0.532 (0.589)                          |
| Apparent c-statistic 0.72 (95% CI 0.70-0.75)                |                                          |
| Adjusted c-statistic 0.72 (95% CI 0.68-0.75)                |                                          |
| Calibration slope 0.977 (95% CI 0.617-1.338)                |                                          |
| Calibration 0.016 (95% CI -0.702-0.734)                     |                                          |
| R <sup>2</sup> 0.065                                        |                                          |
| Knots for cubic spline functions placed at 5, 35, 65 and 95 |                                          |

**Appendix - Table 7. Full model including all candidate predictors for predicting the diagnosis ACS**

| Predictors                                                  | Regression coefficients (standard error) |
|-------------------------------------------------------------|------------------------------------------|
| Intercept                                                   | -15.914 (3.55)                           |
| Age                                                         | 0.288 (0.081)                            |
| Age'                                                        | -0.388 (0.126)                           |
| Age''                                                       | 1.058 (0.396)                            |
| Female gender                                               | 2.459 (5.519)                            |
| Age * Female sex                                            | -0.094 (0.126)                           |
| Age' * Female sex                                           | 0.187 (0.195)                            |
| Age'' * Female sex                                          | -0.554 (0.606)                           |
| Chest pain                                                  | -0.064 (0.365)                           |
| Acute chest pain (< 12 hours)                               | 0.258 (0.200)                            |
| Shortness of breath                                         | -0.141 (0.200)                           |
| Sweating                                                    | 0.459 (0.183)                            |
| Retrosternal located pain                                   | 0.178 (0.177)                            |
| Radiation of chest pain                                     | 0.617 (0.180)                            |
| Pressing heavy feeling                                      | 0.619 (0.272)                            |
| Stabbing pain                                               | -0.200 (0.353)                           |
| History of cardiovascular disease*                          | -0.039 (0.247)                           |
| History of coronary artery disease                          | 0.108 (0.234)                            |
| Someone else calls instead of the patient                   | 0.197 (0.160)                            |
| Patient calls during the night (0am-9am)                    | 0.495 (0.152)                            |
| Apparent c-statistic 0.79 (95% CI 0.76-0.81)                |                                          |
| Adjusted c-statistic 0.77 (95% CI 0.74-0.80)                |                                          |
| Calibration slope 0.818 (95% CI 0.650-0.986)                |                                          |
| Calibration -0.238 (-0.621-0.145)                           |                                          |
| R <sup>2</sup> 0.107                                        |                                          |
| Knots for cubic spline functions placed at 5, 35, 65 and 95 |                                          |

Appendix – Figure 1. Calibration of full model with internal external validation

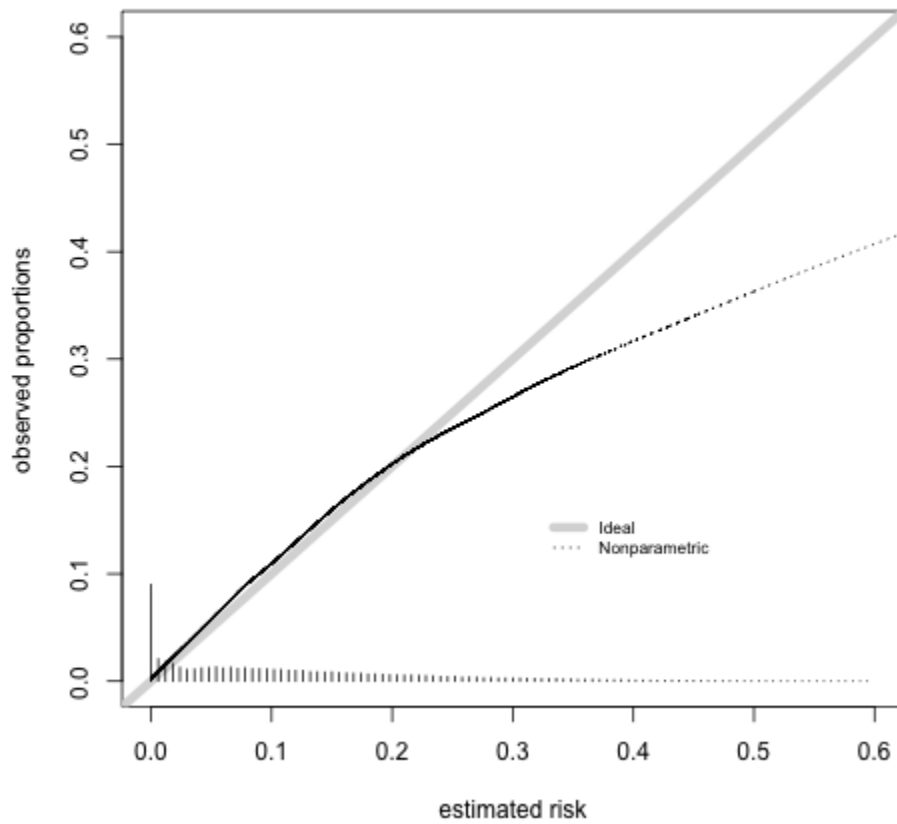

w only



## TRIPOD Checklist: Prediction Model Development and Validation

| Section/Topic                | Item | Checklist Item | Page                                                                                                                                                                                                  |           |
|------------------------------|------|----------------|-------------------------------------------------------------------------------------------------------------------------------------------------------------------------------------------------------|-----------|
| <b>Title and abstract</b>    |      |                |                                                                                                                                                                                                       |           |
| Title                        | 1    | D;V            | Identify the study as developing and/or validating a multivariable prediction model, the target population, and the outcome to be predicted.                                                          | 1         |
| Abstract                     | 2    | D;V            | Provide a summary of objectives, study design, setting, participants, sample size, predictors, outcome, statistical analysis, results, and conclusions.                                               | 2         |
| <b>Introduction</b>          |      |                |                                                                                                                                                                                                       |           |
| Background and objectives    | 3a   | D;V            | Explain the medical context (including whether diagnostic or prognostic) and rationale for developing or validating the multivariable prediction model, including references to existing models.      | 4,5       |
|                              | 3b   | D;V            | Specify the objectives, including whether the study describes the development or validation of the model or both.                                                                                     | 5         |
| <b>Methods</b>               |      |                |                                                                                                                                                                                                       |           |
| Source of data               | 4a   | D;V            | Describe the study design or source of data (e.g., randomized trial, cohort, or registry data), separately for the development and validation data sets, if applicable.                               | 5         |
|                              | 4b   | D;V            | Specify the key study dates, including start of accrual; end of accrual; and, if applicable, end of follow-up.                                                                                        | 5         |
| Participants                 | 5a   | D;V            | Specify key elements of the study setting (e.g., primary care, secondary care, general population) including number and location of centres.                                                          | 5         |
|                              | 5b   | D;V            | Describe eligibility criteria for participants.                                                                                                                                                       | 5,6       |
|                              | 5c   | D;V            | Give details of treatments received, if relevant.                                                                                                                                                     | n.a.      |
| Outcome                      | 6a   | D;V            | Clearly define the outcome that is predicted by the prediction model, including how and when assessed.                                                                                                | 6         |
|                              | 6b   | D;V            | Report any actions to blind assessment of the outcome to be predicted.                                                                                                                                | 6         |
| Predictors                   | 7a   | D;V            | Clearly define all predictors used in developing or validating the multivariable prediction model, including how and when they were measured.                                                         | 6         |
|                              | 7b   | D;V            | Report any actions to blind assessment of predictors for the outcome and other predictors.                                                                                                            | 6         |
| Sample size                  | 8    | D;V            | Explain how the study size was arrived at.                                                                                                                                                            | 6         |
| Missing data                 | 9    | D;V            | Describe how missing data were handled (e.g., complete-case analysis, single imputation, multiple imputation) with details of any imputation method.                                                  | 7         |
| Statistical analysis methods | 10a  | D              | Describe how predictors were handled in the analyses.                                                                                                                                                 | 7         |
|                              | 10b  | D              | Specify type of model, all model-building procedures (including any predictor selection), and method for internal validation.                                                                         | 7         |
|                              | 10c  | V              | For validation, describe how the predictions were calculated.                                                                                                                                         | 7         |
|                              | 10d  | D;V            | Specify all measures used to assess model performance and, if relevant, to compare multiple models.                                                                                                   | 7         |
|                              | 10e  | V              | Describe any model updating (e.g., recalibration) arising from the validation, if done.                                                                                                               | n.a.      |
| Risk groups                  | 11   | D;V            | Provide details on how risk groups were created, if done.                                                                                                                                             | n.a.      |
| Development vs. validation   | 12   | V              | For validation, identify any differences from the development data in setting, eligibility criteria, outcome, and predictors.                                                                         | 7, suppl  |
| <b>Results</b>               |      |                |                                                                                                                                                                                                       |           |
| Participants                 | 13a  | D;V            | Describe the flow of participants through the study, including the number of participants with and without the outcome and, if applicable, a summary of the follow-up time. A diagram may be helpful. | 5         |
|                              | 13b  | D;V            | Describe the characteristics of the participants (basic demographics, clinical features, available predictors), including the number of participants with missing data for predictors and outcome.    | 8,9,10    |
|                              | 13c  | V              | For validation, show a comparison with the development data of the distribution of important variables (demographics, predictors and outcome).                                                        | suppl     |
| Model development            | 14a  | D              | Specify the number of participants and outcome events in each analysis.                                                                                                                               | 8         |
|                              | 14b  | D              | If done, report the unadjusted association between each candidate predictor and outcome.                                                                                                              | 11,12     |
| Model specification          | 15a  | D              | Present the full prediction model to allow predictions for individuals (i.e., all regression coefficients, and model intercept or baseline survival at a given time point).                           | 12, suppl |
|                              | 15b  | D              | Explain how to use the prediction model.                                                                                                                                                              | 13        |
| Model performance            | 16   | D;V            | Report performance measures (with CIs) for the prediction model.                                                                                                                                      | 12, 13    |
| Model-updating               | 17   | V              | If done, report the results from any model updating (i.e., model specification, model performance).                                                                                                   | 12,13     |
| <b>Discussion</b>            |      |                |                                                                                                                                                                                                       |           |
| Limitations                  | 18   | D;V            | Discuss any limitations of the study (such as nonrepresentative sample, few events per predictor, missing data).                                                                                      | 14        |
| Interpretation               | 19a  | V              | For validation, discuss the results with reference to performance in the development data, and any other validation data.                                                                             | 14, 15    |
|                              | 19b  | D;V            | Give an overall interpretation of the results, considering objectives, limitations, results from similar studies, and other relevant evidence.                                                        | 15        |
| Implications                 | 20   | D;V            | Discuss the potential clinical use of the model and implications for future research.                                                                                                                 | 16        |
| <b>Other information</b>     |      |                |                                                                                                                                                                                                       |           |
| Supplementary information    | 21   | D;V            | Provide information about the availability of supplementary resources, such as study protocol, Web calculator, and data sets.                                                                         | 17        |
| Funding                      | 22   | D;V            | Give the source of funding and the role of the funders for the present study.                                                                                                                         | 17        |

\*Items relevant only to the development of a prediction model are denoted by D, items relating solely to a validation of a prediction model are denoted by V, and items relating to both are denoted D;V. We recommend using the TRIPOD Checklist in conjunction with the TRIPOD Explanation and Elaboration document.
